# Supplementary material for: Excess weight by degree and duration and cancer risk (ABACus2 consortium): a cohort study and individual participant data meta-analysis
Source: PubMed Central journal article supplement (PMC11617392; doi:10.1016/j.eclinm.2024.102921), 2024-11-19
Supplement: mmc1.pdf [file mmc1.pdf]

Supplementary

(a) Recall study

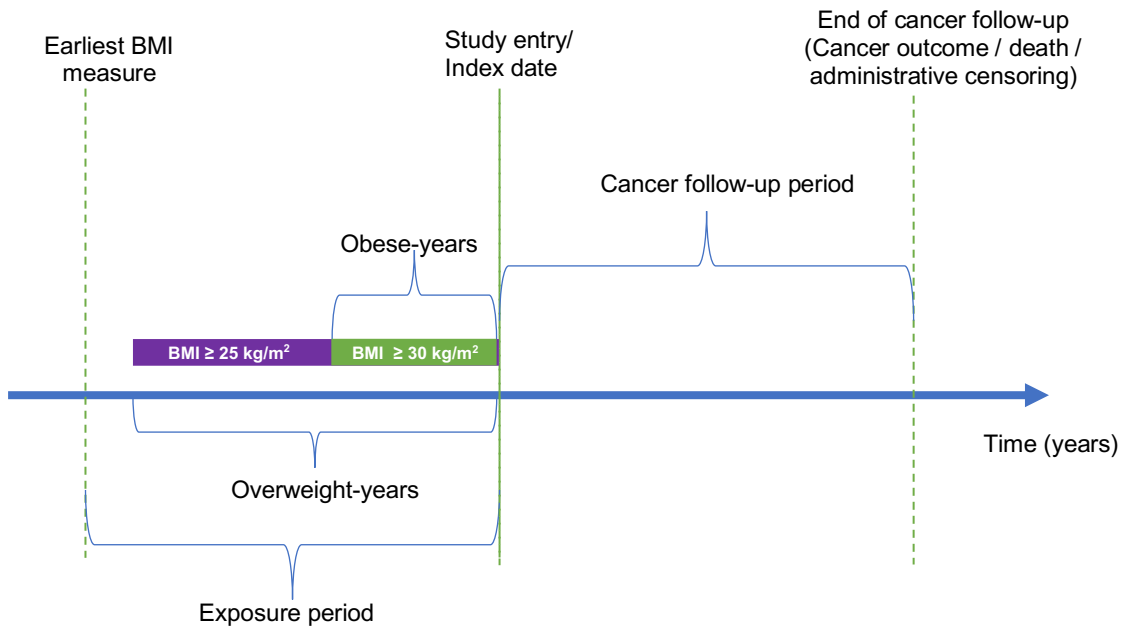

(b) Prospective study

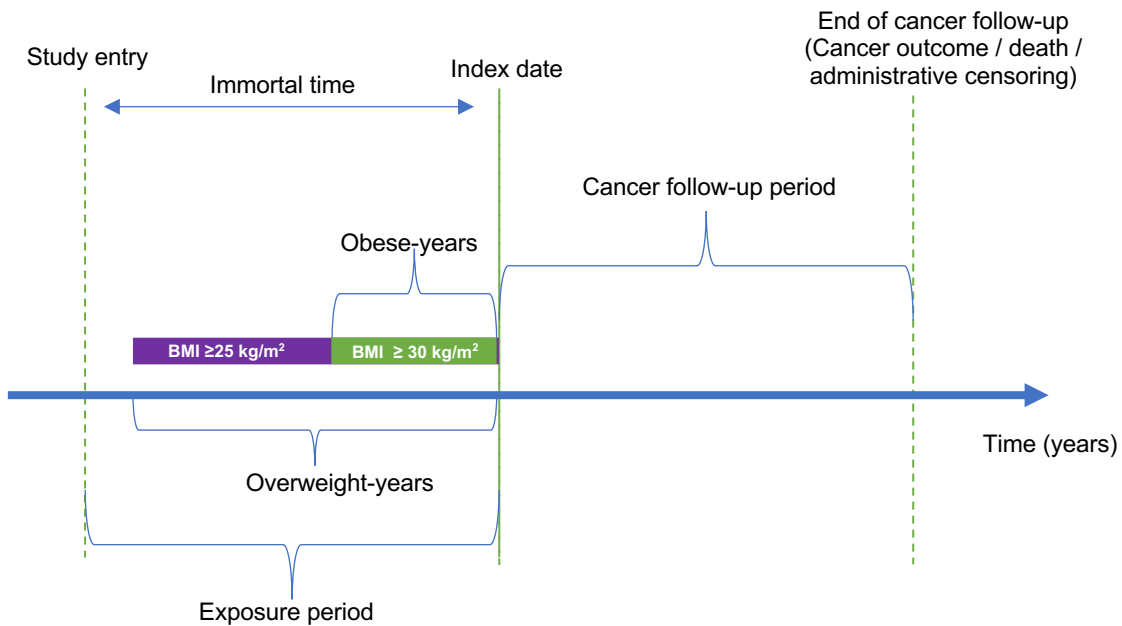

**Figure S1: Diagram of the exposure and follow-up period for a (a) recall and (b) prospective study.** *In the exposure period, overweight-years were calculated for any BMI readings above 24.9 kg/m<sup>2</sup> including those over 30 kg/m<sup>2</sup>. Obese-years were calculated for any BMI readings above 29.9 kg/m<sup>2</sup>. The sum of the overweight- or obese-year exposures before and at the index date and the single BMI measure at the index date were used as excess adiposity exposures. The follow-up period in this study ended with a cancer diagnosis, death or administrative censoring.*

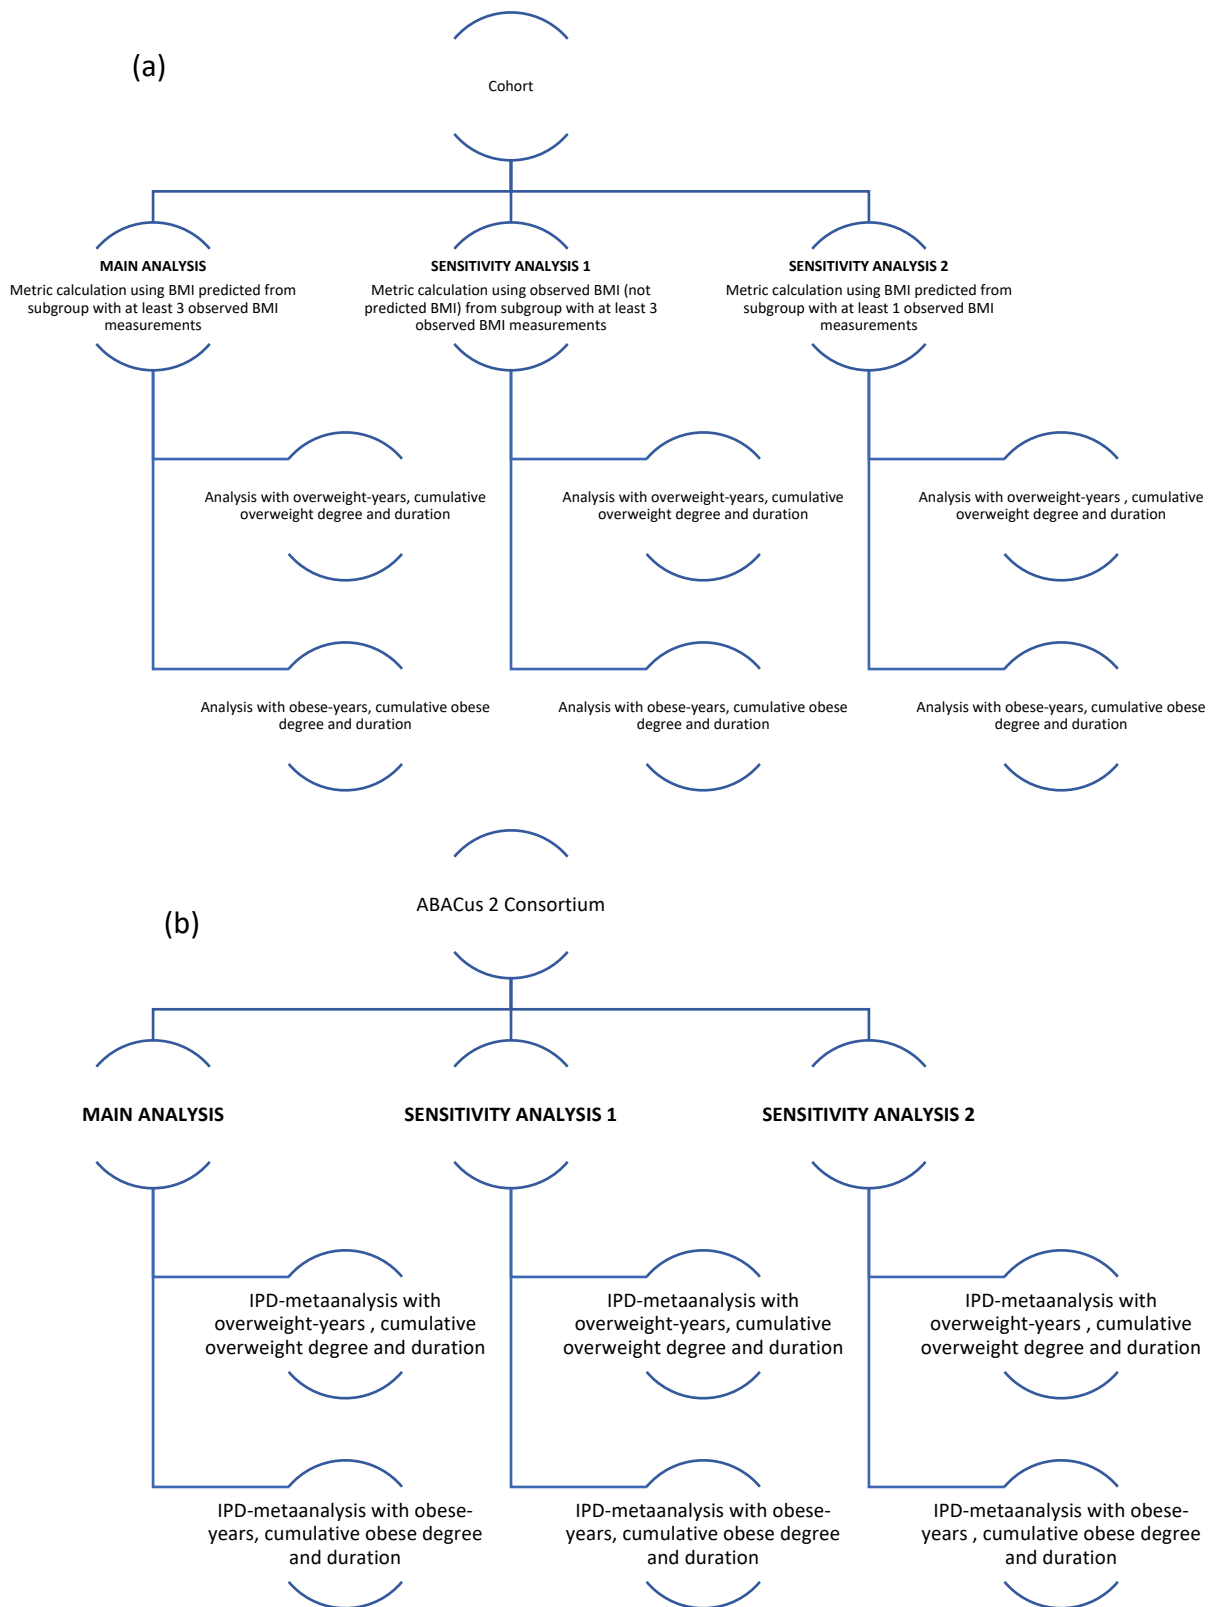

**Figure S2: Diagram of steps within 2-stage IPD metaanalysis: a) individual study analysis undertaken and b) random effects IPD-metaanalysis of the ABACus 2 Consortium.**

**Table S1: Datasets included in the ABACus 2 Consortium.**

| Study                     | Country                  | Study entry date | N       | BMI and WC data collection                                                                                                                                                                                                                                                                     | Disease outcomes                                                                                             | Method of Number of cancer events follow-up                                                                                                                      |
|---------------------------|--------------------------|------------------|---------|------------------------------------------------------------------------------------------------------------------------------------------------------------------------------------------------------------------------------------------------------------------------------------------------|--------------------------------------------------------------------------------------------------------------|------------------------------------------------------------------------------------------------------------------------------------------------------------------|
| <b>ARIC (1)</b>           | US                       | 1987             | 15,792  | Prospective weight and height collection by trained personnel using standardized protocols across centers. Weight, height and WC were collected at Visit 1-4 each 3 years apart and then 15 years later, measures were collected more frequently at Visit 5-8 (1). BMI at age 25 was recalled. | Cancer incidence. Administrative censoring on December 31, 2015.                                             | Linkage to 4 state cancer registries (ICD-O3 codes) supplemented with hospital discharge summaries and medical records.                                          |
| <b>EPIC (2)</b>           | (10 European countries*) | 1990             | 521,000 | BMI and WC data were collected at study entry and BMI at age 20 was recalled. 5 years post study entry, BMI and WC were collected by a questionnaire. Details on data collection by country have been described in-depth elsewhere (3).                                                        | Cancer Incidence. Administrative censoring was center specific (22 collaborating centres).                   | Registry linkage (ICD-10 cancer codes) except in Germany and France, where cancer pathology registries, active-follow-up and health insurance records were used. |
| <b>WHI (3) Women only</b> | US                       | 1991             | 161,808 | At baseline, recall self-reports of BMI at ages 18, 35 and 50 were collected. Height and weight measures were also collected at baseline (5).                                                                                                                                                  | Cancer incidence. Administrative censoring for main study 2005, Extension 1 in 2010 and Extension 2 in 2020. | Annual mailed follow-up questionnaires. Cancer (ICD-10 codes).                                                                                                   |
| <b>PLCO (4)</b>           | US                       | 1993             | 154,887 | Recall BMI at ages 20 and 50 and self-reported BMI at study entry (mean age 63 years) were collected (7).                                                                                                                                                                                      | Cancer incidence. Administrative censoring in 2009.                                                          | Self-reported annual follow-up questionnaires. Cancer codes (ICD-0-3 codes).                                                                                     |
| <b>NIH-AARP (5)</b>       | US                       | 1996             | 566,398 | Recall BMI at ages 18, 35 and 50 were collected by a questionnaire and BMI at study entry (mean age 61) was self-reported.                                                                                                                                                                     | Cancer incidence. Administrative censoring in 2011.                                                          | Cancer registry linkage (ICD-0-3 codes) in the original 8 states of recruitment.                                                                                 |

**Absolute criterion: over three measures of BMI over time**

**\* Denmark, France, Germany, Italy, the Netherlands, Norway, Spain, Sweden and the United Kingdom.**

**Abbreviations: N, number of participants; BMI, body mass index; WC, waist circumference; US, United States; UK, United Kingdom; EPIC, European Prospective Investigation into Cancer and Nutrition; NIH-AARP, NIH-AARP Diet and Health Study; PLCO, Prostate, Lung, Colorectal, Ovarian Cancer Screening Trial; WHI, Women's Health Initiative; ARIC, Atherosclerosis Risk in Communities study.**

1. Joshi CE, Barber JR, Coresh J, Couper DJ, Mosley TH, Vitolins MZ, et al. Enhancing the infrastructure of the atherosclerosis risk in Communities (ARIC) study for cancer epidemiology research: Aric cancer. *Cancer Epidemiol Biomarkers Prev.* 2018 Mar 1;27(3):295–305.
2. Riboli E, Kaaks R. The EPIC Project: Rationale and study design. *Int J Epidemiol.* 1997;26(SUPPL. 1).
3. Anderson G, Cummings S, Freedman LS, Furberg C, Henderson M, Johnson SR, et al. Design of the Women's Health Initiative clinical trial and observational study. *Control Clin Trials.* 1998;19(1):61–109.
4. Black A, Huang W-Y, Wright P, Riley T, Mabie J, Mathew S, et al. PLCO: Evolution of an Epidemiologic Resource and Opportunities for Future Studies. *Rev Recent Clin Trials.* 2015 Oct 7;10(3):238–45.
5. Schatzkin A, Subar AF, Thompson FE, Harlan LC, Tangrea J, Hollenbeck AR, et al. Design and serendipity in establishing a large cohort with wide dietary intake distributions: The National Institutes of Health-American Association of retired persons diet and health study. *Am J Epidemiol.* 2001 Dec 15;154(12):1119–25.

**Table S2: Overweight-years calculation example from an individual in the PLCO cohort.**

| Examination | Interval | Age (Years) | BMI   | Degree of overweight | Duration of overweight | Overweight -years | Cumulative overweight -years | Cumulative excess overweight degree | Cumulative excess overweight duration |
|-------------|----------|-------------|-------|----------------------|------------------------|-------------------|------------------------------|-------------------------------------|---------------------------------------|
| 1           | NA       | 54          | 24.20 | 0.00                 | 0.00                   | 0.00              | 0.00                         | 0.00                                | 0.00                                  |
| 2           | 2        | 56          | 26.40 | 1.50                 | 0.00                   | 0.00              | 0.00                         | 1.50                                | 0.00                                  |
| 3           | 3        | 59          | 26.00 | 1.10                 | 3.00                   | 4.50              | 4.50                         | 2.60                                | 3.00                                  |
| 4           | 5        | 64          | 28.50 | 3.60                 | 5.00                   | 5.50              | 10.00                        | 6.20                                | 8.00                                  |

Example calculation of overweight-years of examination 3 = prior degree of overweight (1.5) x duration of overweight for examination 3 (3) = (1.5 x 3) = 4.5 overweight-years.

**Abbreviation:** BMI, body mass index.

**NB:** This is only a simplified example calculation of the metric. .

**Table S3: Obese-years calculation example from an individual in the PLCO cohort.**

| Examination | Interval | Age (Years) | BMI   | Degree of obesity | Duration of obesity | Obese-years | Cumulative obese-years | Cumulative excess obesity degree | Cumulative excess obesity duration |
|-------------|----------|-------------|-------|-------------------|---------------------|-------------|------------------------|----------------------------------|------------------------------------|
| 1           | NA       | 20          | 29.80 | 0.00              | 0.00                | 0.00        | 0.00                   | 0.00                             | 0.00                               |
| 2           | 1        | 21          | 30.47 | 0.57              | 0.00                | 0.36        | 0.36                   | 0.57                             | 0.00                               |
| 3           | 1        | 22          | 30.68 | 0.78              | 1.00                | 0.57        | 0.94                   | 1.35                             | 1.00                               |
| 4           | 1        | 23          | 30.89 | 0.99              | 1.00                | 0.78        | 1.72                   | 2.34                             | 2.00                               |

Example calculation of obese-years of examination 3 = prior degree of obesity (0.57) x duration of obesity (1) = (0.57x1) = 0.57 obese-years.

**Abbreviation:** BMI, body mass index.

**NB:** This is only a simplified example calculation of the metric. .

**Table S4: Mean exposure to excess BMI at baseline and cancer follow-up.**

| Characteristic                                                                                 | ARIC           | PLCO          | NIH-AARP      | EPIC          | WHI             |
|------------------------------------------------------------------------------------------------|----------------|---------------|---------------|---------------|-----------------|
|                                                                                                | Men            |               |               |               |                 |
| Baseline BMI, kg/m <sup>2</sup>                                                                | 27.70 (4.30)   | 27.50 (4.20)  | 27.20 (4.20)  | 26.30 (3.50)  |                 |
| End of cancer follow up, years                                                                 | 18.00 (8.00)   | 10.40 (4.00)  | 6.70 (4.70)   | 9.30 (3.50)   |                 |
| Incident cancers, N                                                                            | 2,072          | 16,790        | 58,840        | 7,639         |                 |
| Total cumulative overweight years                                                              | 50.00 (65.00)  | 57.00 (81.00) | 52.00 (77.00) | 44.00 (65.00) |                 |
| Total cumulative overweight degree                                                             | 53.00 (67.00)  | 60.00 (84.00) | 55.00 (80.00) | 46.00 (67.00) |                 |
| Total cumulative overweight duration                                                           | 16.00 (12.00)  | 20.00 (16.00) | 19.00 (16.00) | 19.00 (16.00) |                 |
| Total cumulative obese-years                                                                   | 8.00 (26.00)   | 8.00 (32.00)  | 7.00 (30.00)  | 4.00 (20.00)  |                 |
| Total cumulative obese-degree                                                                  | 9.00 (27.00)   | 9.00 (33.00)  | 8.00 (32.00)  | 4.00 (21.00)  |                 |
| Total cumulative obese-duration                                                                | 3.00 (7.00)    | 3.00 (8.00)   | 3.00 (8.00)   | 2.00 (6.40)   |                 |
|                                                                                                | Women          |               |               |               |                 |
| Baseline BMI, kg/m <sup>2</sup>                                                                | 28.20 (6.10)   | 27.10 (5.50)  | 26.80 (5.80)  | 25.30 (4.20)  | 27.20 (5.80)    |
| End of cancer follow up, years                                                                 | 20.00 (7.00)   | 10.80 (3.40)  | 6.40 (4.40)   | 8.70 (3.50)   | 18.20 (5.90)    |
| Incident cancers                                                                               | 1,804          | 10,917        | 29,836        | 10,129        | 11,046          |
| Total cumulative overweight years                                                              | 84.00 (100.00) | 42.00 (83.00) | 41.00 (83.00) | 28.00 (61.00) | 103.00 (132.00) |
| Total cumulative overweight degree                                                             | 89.00 (104.00) | 44.00 (87.00) | 44.00 (87.00) | 29.00 (63.00) | 107.00 (136.00) |
| Total cumulative overweight duration                                                           | 19.00 (13.00)  | 12.00 (14.00) | 12.00 (14.00) | 10.00 (14.00) | 28.00 (18.00)   |
| Total cumulative obese-years                                                                   | 24.00 (55.00)  | 10.00 (40.00) | 10.00 (40.00) | 4.00 (23.00)  | 25.00 (72.00)   |
| Total cumulative obese-degree                                                                  | 26.00 (57.00)  | 11.00 (43.00) | 11.00 (43.00) | 5.00 (25.00)  | 26.00 (75.00)   |
| Total cumulative obese-duration                                                                | 7.00 (10.00)   | 3.00 (7.00)   | 3.00 (7.00)   | 1.60 (5.70)   | 7.00 (13.00)    |
| Mean (SD) at baseline.                                                                         |                |               |               |               |                 |
| <b>Abbreviations:</b> N = number of participants; SD, standard deviation; BMI, body mass index |                |               |               |               |                 |

**Table S5: All-cause and cancer mortality in the original cohorts, main study and sensitivity analyses.**

| Cohorts         | Mortality       |             |              | Cancer Mortality |            |            |
|-----------------|-----------------|-------------|--------------|------------------|------------|------------|
|                 | Original cohort | ≥ 3BMI      | ≥ 1BMI       | Original cohort  | ≥ 3BMI     | ≥ 1BMI     |
|                 | <b>Men</b>      |             |              |                  |            |            |
| <b>ARIC</b>     | 4,281 (61)      | 3,475 (59)  | 3,648 (58)   | 1,079 (15)       | 866 (15)   | 910 (15)   |
| <b>PLCO</b>     | 27,115 (34)     | 25,432 (35) | 25,643 (36)  | 8,270 (11)       | 7,752 (11) | 7,806 (11) |
| <b>NIH-AARP</b> | 194,765 (57)    | 105,150(56) | 186,079 (57) | 26,588 (8)       | 14,519 (8) | 25,049 (8) |
| <b>EPIC</b>     | 21,424 (16)     | 6,784 (14)  | 10,739 (11)  | 1,979 (2)        | 629 (1)    | 944 (1)    |
| <b>Women</b>    |                 |             |              |                  |            |            |
| <b>ARIC</b>     | 4,077 (47)      | 3,407 (45)  | 3,469 (45)   | 889 (10)         | 714 (9)    | 728 (9)    |
| <b>PLCO</b>     | 17,600 (23)     | 16,520 (22) | 16,743 (22)  | 5,591 (8)        | 5,258 (7)  | 5,319 (7)  |
| <b>NIH-AARP</b> | 106,872 (47)    | 57,283 (45) | 100,597 (47) | 14,996 (7)       | 8,226 (6)  | 13,925 (6) |
| <b>EPIC</b>     | 25,212 (8)      | 6,239 (6)   | 10,364 (5)   | 2,161 (1)        | 520 (1)    | 779 (1)    |
| <b>WHI</b>      | 66,068 (41)     | 38,261 (42) | 65,277 (41)  | 9,655 (6)        | 5,680 (6)  | 9,529 (5)  |

Values in parentheses are percentages of the subgroup listed unless stated otherwise.  
**Abbreviations:** N, number of participants; BMI, body mass index; US, United States; UK, United Kingdom; EPIC, European Prospective Investigation into Cancer and Nutrition<sup>1</sup>; NIH-AARP, Diet and Health Study; PLCO, Prostate, Lung, Colorectal, Ovarian Cancer Screening Trial; WHI, Women's Health Initiative; ARIC, Atherosclerosis Risk in Communities study; NA, not applicable. <sup>1</sup>Denmark, France, Germany, Italy, Netherlands, Norway, Spain, Sweden and the United Kingdom.

**Table S6: Characteristics of those included and excluded from this study.**

| Characteristic                                | Men                   |                       |                      |                       |                         |                        |                        |                        |                      |                       |
|-----------------------------------------------|-----------------------|-----------------------|----------------------|-----------------------|-------------------------|------------------------|------------------------|------------------------|----------------------|-----------------------|
|                                               | ARIC                  |                       | PLCO                 |                       | NIH-AARP                |                        | EPIC                   |                        |                      |                       |
|                                               | Included<br>N = 5,897 | Excluded<br>N = 1,173 | Included<br>N=71,667 | Excluded<br>N = 4,197 | Included<br>N = 187,528 | Excluded<br>N=152,138  | Included<br>N = 47,040 | Excluded<br>N = 84,385 |                      |                       |
| Age *, years, mean (SD)                       | 57.0 (6.0)            | 57.2 (5.8)            | 63.0 (5.0)           | 64.0 (6.0)            | 62.0 (5.3)              | 62.0 (5.4)             | 60.0 (8.0)             | 57.0 (9)               |                      |                       |
| Missing                                       | 0                     | 678                   | 0                    | 2,572                 | 0                       | 0                      | 0                      | 0                      |                      |                       |
| Height*, meters, mean (SD)                    | 1.76 (0.07)           | 1.77 (0.07)           | 1.78 (0.08)          | 1.78 (0.08)           | 1.78 (0.07)             | 1.78 (0.08)            | 1.76 (0.07)            | 1.74 (0.07)            |                      |                       |
| Missing                                       | 0                     | 10                    | 0                    | 3,289                 | 0                       | 3,842                  | 0                      | 32,386                 |                      |                       |
| BMI at baseline*, kg/m <sup>2</sup> mean (SD) | 27.7 (4.3)            | 27.4 (4.4)            | 27.5 (4.2)           | 27.0 (5.0)            | 27.2 (4.2)              | 27.4 (4.5)             | 26.3 (3.5)             | 27.0 (3.6)             |                      |                       |
| Missing                                       | 0                     | 693                   | 0                    | 3,768                 | 0                       | 6,580                  | 0                      | 32,386                 |                      |                       |
| <b>Race</b>                                   |                       |                       |                      |                       |                         |                        |                        |                        |                      |                       |
| White                                         | 4,707 (80)            | 710 (61)              | 63,452 (89)          | 1,269 (78)            | 176,095 (95)            | 138,213 (91)           | NA                     |                        |                      |                       |
| Black                                         | 1,190 (20)            | 440 (38)              | 3,163(4)             | 153 (9)               | 3,961 (2)               | 5,343 (4)              |                        |                        |                      |                       |
| Other                                         | NA                    | 23 (2)                | 5,012(7)             | 199 (5)               | 5,670 (3)               | 6,251(4)               |                        |                        |                      |                       |
| Missing                                       | 0                     | 0                     | 40                   | 2,576                 | 0                       | 2,331                  |                        |                        |                      |                       |
| <b>Smoking</b>                                |                       |                       |                      |                       |                         |                        |                        |                        |                      |                       |
| Ever                                          | 4,349 (74)            | 351 (30)              | 45,514 (64)          | 998 (62)              | 125,537 (69)            | 102,629(7)             | 31,224 (67)            | 31,468(64)             |                      |                       |
| Never                                         | 1,533 (26)            | 141 (12)              | 26,141 (36)          | 618 (15)              | 55,489 (31)             | 42,410(28)             | 15,357 (33)            | 17,359(36)             |                      |                       |
| Missing                                       | 15                    | 681                   | 12                   | 2,581                 | 6,502                   | 7,099                  | 459                    | 35,558                 |                      |                       |
| Alcohol consumption, units per week*          | 4 (9)                 | 4 (8)                 | 9 (26)               | 10 (13)               | 8 (20)                  | 2 (5)                  | 15 (19)                | 21 (22)                |                      |                       |
| Missing                                       | 20                    | 683                   | 16,463               | 1,989                 | 0                       | 0                      | 20,688                 | 43,122                 |                      |                       |
|                                               | Women                 |                       |                      |                       |                         |                        |                        |                        |                      |                       |
|                                               | ARIC                  |                       | PLCO                 |                       | NIH-AARP                |                        | EPIC                   |                        | WHI                  |                       |
|                                               | Included<br>N = 7,566 | Excluded<br>N = 1,121 | Included<br>N=74,087 | Excluded<br>N = 3,497 | Included<br>N = 126,906 | Excluded<br>N = 99,826 | Included<br>N=108,486  | Excluded<br>N =210,200 | Included<br>N=91,033 | Excluded<br>N =70,752 |
| Age *, years, mean (SD)                       | 57.0 (6.0)            | 57.0 (6.0)            | 63.0 (5.0)           | 64.0 (6.0)            | 62.0 (5.0)              | 62.0 (5.0)             | 57.0 (10.0)            | 60.0 (10.0)            | 64.0 (7.0)           | 63.0 (7.0)            |
| Missing                                       | 0                     | 766                   | 0                    | 1,893                 | 0                       | 0                      | 0                      | 0                      | 0                    | 3                     |
| Height*, meters, mean (SD)                    | 1.62 (0.06)           | 1.62 (0.06)           | 1.63 (0.02)          | 1.63 (0.08)           | 1.63 (0.06)             | 1.63 (0.07)            | 1.64 (0.06)            | 1.62 (0.07)            | 1.62 (0.07)          | 1.61 (0.07)           |
| Missing                                       | 0                     | 9                     | 0                    | 2,385                 | 0                       | 2,416                  | 0                      | 0                      | 0                    | 891                   |
| BMI at baseline*, kg/m <sup>2</sup> mean (SD) | 28.2 (6.1)            | 28.9 (7.0)            | 27.1 (5.5)           | 29.0 (9.0)            | 26.8 (5.8)              | 27.0 (6.5)             | 25.3 (4.2)             | 25.2 (4.4)             | 27.2 (5.8)           | 28.9 (5.9)            |
| Missing                                       | 0                     | 779                   | 0                    | 2,980                 | 0                       | 7,364                  | 0                      | 79,274                 | 0                    | 1,393                 |
| <b>Race</b>                                   |                       |                       |                      |                       |                         |                        |                        |                        |                      |                       |
| White                                         | 5,475 (72)            | 558 (50)              | 65,856 (89)          | 1,197 (75)            | 116,400 (93)            | 86,206(86)             | NA                     |                        | 76,213 (84)          | 57,305(81)            |
| Black                                         | 2,091 (28)            | 538 (48)              | 4,076(6)             | 222 (6)               | 5,582(5)                | 7,109 (7)              |                        |                        | 10,287 (11)          | 9,234 (13)            |
| Other                                         | NA                    | 25 (2.2)              | 4,129 (6)            | 184(5)                | 3,443 (3)               | 4,335 (4)              |                        |                        | 4,281 (5)            | 4,052 (6)             |
| Missing                                       | 0                     | 0                     | 26                   | 1,894                 | 0                       | 2,176                  |                        |                        | 252                  | 161                   |
| <b>Smoking</b>                                |                       |                       |                      |                       |                         |                        |                        |                        |                      |                       |
| Ever                                          | 3,745 (50)            | 169 (15)              | 32,856 (44)          | 705 (44)              | 67,396 (55)             | 52,547(53)             | 50,190 (50)            | 47,195(40)             | 44,146 (49)          | 34,093(49)            |
| Never                                         | 3,810 (50)            | 182 (16)              | 41,226 (56)          | 895 (26)              | 55,789 (45)             | 42,802(43)             | 50,293 (50)            | 71,351 (60)            | 42,927 (47)          | 35,752 (51)           |
| Missing                                       | 11                    | 770                   | 5                    | 1,897                 | 3,721                   | 4,477                  | 8,003                  | 91,654                 | 1,219                | 907                   |
| Alcohol consumption, units per week*          | 1 (4)                 | 1 (3)                 | 9 (26)               | 3 (12)                | 3 (8)                   | 1 (2)                  | 7 (9)                  | 8 (12)                 | 2 (5)                | 2 (4)                 |
| Missing                                       | 11                    | 771                   | 16,463               | 1,543                 | 0                       | 0                      | 31,496                 | 93,273                 | 47                   | 87                    |
| <b>HRT</b>                                    |                       |                       |                      |                       |                         |                        |                        |                        |                      |                       |
| Ever                                          | 4,109 (54)            | 81 (7)                | 49,058 (67)          | 818 (54)              | 77,513 (62)             | 5,549 (50)             | 25,884 (28)            | 21,517(18)             | 54,296 (60)          | 36,480(52)            |
| Never                                         | 2,242 (35)            | 206 (18)              | 24,578 (33)          | 704 (20)              | 47,797 (38)             | 4,749 (43)             | 66,873 (72)            | 99,592(82)             | 36,659 (40)          | 34,212(48)            |
| Missing                                       | 1,215                 | 834                   | 356                  | 1,975                 | 1,596                   | 852                    | 15,729                 | 89,091                 | 78                   | 60                    |

Values in parentheses are percentages unless otherwise stated.  
\*Baseline refers to the index date.  
**Abbreviations:** N, number of participants; BMI, body mass index; WC, waist circumference; HRT, hormone replacement therapy; US, United States; UK, United Kingdom; EPIC, European Prospective Investigation into Cancer and Nutrition<sup>1</sup>; NIH-AARP, Diet and Health Study; PLCO, Prostate, Lung, Colorectal, Ovarian Cancer Screening Trial; WHI, Women's Health Initiative; ARIC, Atherosclerosis Risk in Communities study; NA, not applicable.  
<sup>1</sup>Denmark, France, Germany, Italy, the Netherlands, Norway, Spain, Sweden and the United Kingdom

**Table S7: Characteristics\* of the analytic cohorts of participants with at least 1 BMI reading.**

| Characteristic                                           | Men                  |                       |                                |                       | Women                |                       |                                |                        |                       |
|----------------------------------------------------------|----------------------|-----------------------|--------------------------------|-----------------------|----------------------|-----------------------|--------------------------------|------------------------|-----------------------|
|                                                          | ARIC<br>N =<br>6,240 | PLCO<br>N =<br>72,016 | NIH-<br>AARP<br>N =<br>327,022 | EPIC<br>N =<br>94,600 | ARIC<br>N =<br>7,701 | PLCO<br>N =<br>74,565 | NIH-<br>AARP<br>N =<br>216,030 | EPIC<br>N =<br>225,704 | WHI<br>N =<br>160,142 |
| Age *, years,<br>mean (SD)                               | 57.0<br>(6.0)        | 63.0<br>(5.0)         | 62.0<br>(5.0)                  | 58.0<br>(9.0)         | 57.0<br>(6.0)        | 63.0<br>(5.0)         | 61.0<br>(5.0)                  | 58.0<br>(10.0)         | 63.0<br>(7.0)         |
| Height*, meters,<br>mean (SD)                            | 1.8<br>(0.1)         | 1.8<br>(0.1)          | 1.8<br>(0.1)                   | 1.8<br>(0.1)          | 1.6<br>(0.1)         | 1.6<br>(0.1)          | 1.6<br>(0.1)                   | 1.6<br>(0.1)           | 1.6<br>(0.1)          |
| Missing                                                  | 0                    | 0                     | 0                              | 0                     | 0                    | 0                     | 0                              | 0                      | 659                   |
| BMI *, kg/m <sup>2</sup>                                 | 27.7<br>(4.3)        | 27.5<br>(4.2)         | 27.3<br>(4.2)                  | 26.7<br>(3.6)         | 28.2<br>(6.0)        | 27.1<br>(5.5)         | 26.9 (5.8)                     | 25.3<br>(4.4)          | 28.0<br>(5.9)         |
| <b>Ethnicity</b>                                         |                      |                       |                                |                       |                      |                       |                                |                        |                       |
| White                                                    | 4,941<br>(79)        | 63,669<br>(88)        | 303,064<br>(94)                |                       | 5,535<br>(72)        | 66,169<br>(89)        | 193,957<br>(91)                |                        | 132,185<br>(83)       |
| Black                                                    | 1,299<br>(21)        | 3,223<br>(5)          | 8,737<br>(3)                   |                       | 2,166<br>(28)        | 4,173<br>(5)          | 11,595<br>(5)                  |                        | 19,316 (12)           |
| Other                                                    | NA                   | 5,082<br>(7)          | 11,422<br>(4)                  |                       | NA                   | 4,197<br>(6)          | 7,215<br>(3)                   |                        | 8,235<br>(5)          |
| Missing                                                  | NA                   | 42                    | 3,799                          |                       | NA                   | 26                    | 3,263                          |                        | 406                   |
| <b>Smoking</b>                                           |                      |                       |                                |                       |                      |                       |                                |                        |                       |
| Ever                                                     | 4,598<br>(74)        | 45,714<br>(63)        | 219,703<br>(70)                | 60,276<br>(65)        | 3,808<br>(50)        | 33,055<br>(44)        | 114,551<br>(55)                | 92,524<br>(44)         | 77,403 (49)           |
| Never                                                    | 1,626<br>(26)        | 26,289<br>(37)        | 94,481 (29)                    | 31,754<br>(34)        | 3,882<br>(50)        | 41,505<br>(56)        | 93,976<br>(44)                 | 155,532<br>(52)        | 80,638 (50)           |
| Missing                                                  | 16                   | 13                    | 12,838                         | 2,570                 | 11                   | 5                     | 7,503                          | 17,648                 | 2,101                 |
| Alcohol<br>consumption,<br>units of alcohol<br>per week* | 4 (9)                | 9 (26)                | 8 (21)                         | 10 (11)               | 1 (4)                | 3 (9)                 | 3 (8)                          | 4 (6)                  | 2 (5)                 |
| Missing                                                  | 22                   | 16,636                | 0                              | 29,760                | 12                   | 15,005                | 0                              | 42,259                 | 134                   |
| <b>HRT</b>                                               |                      |                       |                                |                       |                      |                       |                                |                        |                       |
| Ever                                                     |                      |                       |                                |                       | 4187<br>(54)         | 49,280<br>(67)        | 80,575<br>(62)                 | 45,636<br>(24)         | 89,947 (56)           |
| Never                                                    |                      |                       |                                |                       | 2,272<br>(35)        | 24,823<br>(33)        | 50,310<br>(23)                 | 145,960<br>(65)        | 70,056 (44)           |
| Missing                                                  |                      |                       |                                |                       | 1,242                | 462                   | 85,145                         | 34,108                 | 139                   |

\* Mean (SD); n ()

<sup>1</sup> Values in parentheses are percentages unless otherwise stated.

**Abbreviations:** N, number of participants; BMI, body mass index; WC, waist circumference; HRT, hormone replacement therapy; US, United States; UK, United Kingdom; EPIC, European Prospective Investigation into Cancer and Nutrition<sup>1</sup>; NIH-AARP, Diet and Health Study; PLCO, Prostate, Lung, Colorectal, Ovarian Cancer Screening Trial; WHI, Women's Health Initiative; ARIC, Atherosclerosis Risk in Communities study.

<sup>1</sup>Denmark, France, Germany, Italy, the Netherlands, Norway, Spain, Sweden and the United Kingdom.



**Findings from analysis using predicted BMI from participants with at least 3 measured BMI readings**

a) Analysis of overweight-years exposure

**Table S8: Hazard ratio of specific cancers per 100 overweight-years and per 5-unit baseline BMI, ABACus 2 Consortium.**

| Outcomes                                                                                                                                                                          | Number of cancer events | Overweight-years (per 100 kg-years/m <sup>2</sup> ) |                |                         |                | BMI (per 5 units)        |                |                         |                |
|-----------------------------------------------------------------------------------------------------------------------------------------------------------------------------------|-------------------------|-----------------------------------------------------|----------------|-------------------------|----------------|--------------------------|----------------|-------------------------|----------------|
|                                                                                                                                                                                   |                         | Age-adjusted HR (95% CI)                            | I <sup>2</sup> | MV-adjusted HR (95% CI) | I <sup>2</sup> | Age-adjusted HR (95% CI) | I <sup>2</sup> | MV-adjusted HR (95% CI) | I <sup>2</sup> |
| <b>Men</b>                                                                                                                                                                        |                         |                                                     |                |                         |                |                          |                |                         |                |
| †Total Cancers                                                                                                                                                                    | 85,341                  | 1.02<br>(0.98,1.07)                                 | 0.69           | 1.02<br>(0.98,1.06)     | 0.74           | 1.01<br>(0.99,1.03)      | 0.35           | 1.01<br>(0.98,1.05)     | 0.61           |
| OBR-cancers                                                                                                                                                                       | 12,959                  | 1.20<br>(1.19,1.21)                                 | 0.00           | 1.20<br>(1.19,1.21)     | 0.00           | 1.20<br>(1.18,1.22)      | 0.00           | 1.20<br>(1.19,1.21)     | 0.00           |
| NOR-cancers                                                                                                                                                                       | 64,743                  | 0.97<br>(0.96,0.99)                                 | 0.05           | 0.97<br>(0.94,1.00)     | 0.54           | 0.97<br>(0.96,0.98)      | 0.00           | 0.96<br>(0.94,0.99)     | 0.17           |
| NOR-cancers excluding lung and prostate                                                                                                                                           | 26,178                  | 1.06<br>(1.03,1.08)                                 | 0.02           | 1.05<br>(1.02,1.09)     | 0.05           | 1.05<br>(1.03,1.07)      | 0.00           | 1.04<br>(1.01,1.08)     | 0.00           |
| <b>Specific cancer sites</b>                                                                                                                                                      |                         |                                                     |                |                         |                |                          |                |                         |                |
| Colorectal                                                                                                                                                                        | 6,037                   | 1.22<br>(1.00,1.49)                                 | 0.72           | 1.21<br>(1.00,1.48)     | 0.70           | 1.17<br>(1.12,1.23)      | 0.18           | 1.17<br>(1.12,1.23)     | 0.08           |
| Pancreas                                                                                                                                                                          | 1,957                   | 1.11<br>(1.02,1.21)                                 | 0.00           | 1.11<br>(1.02,1.2)      | 0.00           | 1.09<br>(0.97,1.21)      | 0.00           | 1.09<br>(0.98,1.21)     | 0.00           |
| Kidney                                                                                                                                                                            | 1,967                   | 1.27<br>(1.10,1.46)                                 | 0.23           | 1.26<br>(1.09,1.45)     | 0.24           | 1.31<br>(1.18,1.45)      | 0.22           | 1.30<br>(1.17,1.44)     | 0.22           |
| Bladder                                                                                                                                                                           | 4,018                   | 1.10<br>(1.03,1.18)                                 | 0.00           | 1.09<br>(1.01,1.18)     | 0.00           | 1.09<br>(1.03,1.16)      | 0.00           | 1.07<br>(1.00,1.15)     | 0.00           |
| Lung                                                                                                                                                                              | 8,559                   | 0.92<br>(0.85,0.99)                                 | 0.44           | 0.90<br>(0.83,0.98)     | 0.55           | 0.84<br>(0.72,0.98)      | 0.84           | 0.81<br>(0.71,0.93)     | 0.83           |
| Prostate                                                                                                                                                                          | 30,006                  | 0.95<br>(0.88,1.03)                                 | 0.69           | 0.95<br>(0.88,1.02)     | 0.66           | 0.97<br>(0.89,1.05)      | 0.82           | 0.97<br>(0.90,1.03)     | 0.73           |
| <b>Women</b>                                                                                                                                                                      |                         |                                                     |                |                         |                |                          |                |                         |                |
| †Total Cancers                                                                                                                                                                    | 63,732                  | 1.05<br>(1.02,1.07)                                 | 0.69           | 1.06<br>(1.04,1.07)     | 0.37           | 1.04<br>(1.00,1.08)      | 0.85           | 1.05<br>(1.02,1.09)     | 0.83           |
| OBR-cancers                                                                                                                                                                       | 36,509                  | 1.09<br>(1.08,1.11)                                 | 0.08           | 1.10<br>(1.09,1.12)     | 0.00           | 1.10<br>(1.07,1.12)      | 0.74           | 1.10<br>(1.07,1.14)     | 0.82           |
| NOR-cancers                                                                                                                                                                       | 24,499                  | 0.97<br>(0.96,0.99)                                 | 0.00           | 0.99<br>(0.98,1.01)     | 0.00           | 0.93<br>(0.85,1.03)      | 0.81           | 0.95<br>(0.85,1.06)     | 0.84           |
| NOR-cancers excluding lung                                                                                                                                                        | 16,352                  | 1.01<br>(0.98,1.04)                                 | 0.36           | 1.03<br>(1.01,1.04)     | 0.00           | 0.99<br>(0.94,1.04)      | 0.67           | 1.00<br>(0.95,1.05)     | 0.62           |
| <b>Specific cancer sites</b>                                                                                                                                                      |                         |                                                     |                |                         |                |                          |                |                         |                |
| Colorectal                                                                                                                                                                        | 6,251                   | 1.10<br>(1.08,1.11)                                 | 0.00           | 1.09<br>(1.07,1.10)     | 0.00           | 1.08<br>(1.04,1.12)      | 0.33           | 1.07<br>(1.04,1.11)     | 0.10           |
| Pancreas                                                                                                                                                                          | 2,019                   | 1.06<br>(0.90,1.26)                                 | 0.69           | 1.04<br>(0.93,1.17)     | 0.52           | 1.02<br>(0.96,1.08)      | 0.16           | 1.02<br>(0.98,1.06)     | 0.00           |
| Kidney                                                                                                                                                                            | 1,270                   | 1.25<br>(1.16,1.34)                                 | 0.00           | 1.23<br>(1.15,1.31)     | 0.00           | 1.28<br>(1.10,1.49)      | 0.88           | 1.27<br>(1.09,1.47)     | 0.87           |
| Lung                                                                                                                                                                              | 8,114                   | 0.86<br>(0.80,0.93)                                 | 0.77           | 0.90<br>(0.85,0.95)     | 0.49           | 0.86<br>(0.79,0.94)      | 0.75           | 0.88<br>(0.81,0.96)     | 0.73           |
| Endometria<br>1                                                                                                                                                                   | 3,931                   | 1.36<br>(1.20,1.55)                                 | 0.95           | 1.37<br>(1.21,1.54)     | 0.92           | 1.33<br>(1.16,1.52)      | 0.94           | 1.36<br>(1.16,1.59)     | 0.95           |
| Ovarian                                                                                                                                                                           | 2,717                   | 1.02<br>(0.93,1.12)                                 | 0.55           | 1.03<br>(0.94,1.13)     | 0.48           | 0.99<br>(0.89,1.10)      | 0.70           | 1.01<br>(0.91,1.12)     | 0.69           |
| Post-menopausal breast cancer                                                                                                                                                     | 17,582                  | 1.01<br>(0.98,1.04)                                 | 0.28           | 1.03<br>(0.99,1.08)     | 0.41           | 1.05<br>(1.00,1.10)      | 0.61           | 1.07<br>(1.01,1.13)     | 0.72           |
| *Multivariable adjusted models: baseline age, ethnicity, alcohol, smoking, HRT.                                                                                                   |                         |                                                     |                |                         |                |                          |                |                         |                |
| † The sum of OBR and NOR cancer does not equal total cancers as non-melanoma skin cancers were excluded in the EPIC cohort analyses.                                              |                         |                                                     |                |                         |                |                          |                |                         |                |
| <b>Abbreviations:</b> OBR, obesity-related; NOR, non-obesity-related; CI, confidence interval; HR, hazard ratio; BMI, body mass index; MV, multivariable; SD, standard deviation. |                         |                                                     |                |                         |                |                          |                |                         |                |

**Table S9: Comparison of the overweight degree and duration per 10 units and per 10 years respectively, ABACus 2 Consortium.**

| Outcomes                                                                                                                                                                                                                                                                                                                                                                                                                                                                                                                                                                                                                                   | Number of cancer events | Degree of Overweight (per 10 units) |                |                         |                | Duration of Overweight (per 10 years) |                |                         |                |
|--------------------------------------------------------------------------------------------------------------------------------------------------------------------------------------------------------------------------------------------------------------------------------------------------------------------------------------------------------------------------------------------------------------------------------------------------------------------------------------------------------------------------------------------------------------------------------------------------------------------------------------------|-------------------------|-------------------------------------|----------------|-------------------------|----------------|---------------------------------------|----------------|-------------------------|----------------|
|                                                                                                                                                                                                                                                                                                                                                                                                                                                                                                                                                                                                                                            |                         | Age-adjusted HR (95% CI)            | I <sup>2</sup> | MV-adjusted HR (95% CI) | I <sup>2</sup> | Age-adjusted HR (95% CI)              | I <sup>2</sup> | MV-adjusted HR (95% CI) | I <sup>2</sup> |
| <b>Men</b>                                                                                                                                                                                                                                                                                                                                                                                                                                                                                                                                                                                                                                 |                         |                                     |                |                         |                |                                       |                |                         |                |
| †Total Cancers                                                                                                                                                                                                                                                                                                                                                                                                                                                                                                                                                                                                                             | 85,341                  | 1.00<br>(0.99,1.01)                 | 0.91           | 1.00<br>(0.99,1.01)     | 0.91           | 1.01<br>(0.99,1.02)                   | 0.29           | 1.01<br>(1.00,1.02)     | 0.13           |
| OBR-cancers                                                                                                                                                                                                                                                                                                                                                                                                                                                                                                                                                                                                                                | 12,959                  | 1.02<br>(1.01,1.02)                 | 0.80           | 1.02<br>(1.01,1.02)     | 0.79           | 1.06<br>(1.10,1.11)                   | 0.76           | 1.06<br>(1.00,1.11)     | 0.76           |
| NOR-cancers                                                                                                                                                                                                                                                                                                                                                                                                                                                                                                                                                                                                                                | 64,743                  | 1.00<br>(1.00,1.00)                 | 0.00           | 1.00<br>(1.00,1.00)     | 0.00           | 0.99<br>(0.99,1.00)                   | 0.00           | 1.00<br>(0.98,1.02)     | 0.71           |
| NOR-cancers excluding lung and prostate                                                                                                                                                                                                                                                                                                                                                                                                                                                                                                                                                                                                    | 26,178                  | 1.00<br>(0.99,1.02)                 | 0.86           | 1.00<br>(0.99,1.02)     | 0.86           | 1.03<br>(1.01,1.05)                   | 0.07           | 1.03<br>(1.01,1.05)     | 0.16           |
| <b>Specific cancer sites</b>                                                                                                                                                                                                                                                                                                                                                                                                                                                                                                                                                                                                               |                         |                                     |                |                         |                |                                       |                |                         |                |
| Colorectal                                                                                                                                                                                                                                                                                                                                                                                                                                                                                                                                                                                                                                 | 6,037                   | 1.01<br>(0.99,1.04)                 | 0.86           | 1.01<br>(1.00,1.02)     | 0.47           | 1.04<br>(0.98,1.09)                   | 0.72           | 1.04<br>(0.99,1.09)     | 0.61           |
| Pancreas                                                                                                                                                                                                                                                                                                                                                                                                                                                                                                                                                                                                                                   | 1,957                   | 1.01<br>(1.00,1.02)                 | 0.08           | 1.01<br>(1.00,1.02)     | 0.00           | 1.05<br>(1.02,1.09)                   | 0.00           | 1.05<br>(1.02,1.09)     | 0.00           |
| Kidney                                                                                                                                                                                                                                                                                                                                                                                                                                                                                                                                                                                                                                     | 1,967                   | 1.01<br>(0.99,1.03)                 | 0.29           | 1.01<br>(0.99,1.03)     | 0.29           | 1.10<br>(0.94,1.28)                   | 0.63           | 1.09<br>(0.90,1.33)     | 0.66           |
| Bladder                                                                                                                                                                                                                                                                                                                                                                                                                                                                                                                                                                                                                                    | 4,018                   | 1.01<br>(1.00,1.02)                 | 0.00           | 1.01<br>(1.00,1.02)     | 0.00           | 1.03<br>(0.98,1.07)                   | 0.00           | 1.02<br>(0.98,1.07)     | 0.00           |
| Lung                                                                                                                                                                                                                                                                                                                                                                                                                                                                                                                                                                                                                                       | 8,559                   | 1.00<br>(0.98,1.01)                 | 0.62           | 1.00<br>(0.97,1.02)     | 0.91           | 0.95<br>(0.90,1.01)                   | 0.75           | 0.95<br>(0.88,1.03)     | 0.86           |
| Prostate                                                                                                                                                                                                                                                                                                                                                                                                                                                                                                                                                                                                                                   | 30,006                  | 1.00<br>(0.99,1.01)                 | 0.88           | 0.99<br>(0.98,1.00)     | 0.76           | 0.99<br>(0.97,1.01)                   | 0.22           | 0.99<br>(0.96,1.02)     | 0.68           |
| <b>Women</b>                                                                                                                                                                                                                                                                                                                                                                                                                                                                                                                                                                                                                               |                         |                                     |                |                         |                |                                       |                |                         |                |
| †Total Cancers                                                                                                                                                                                                                                                                                                                                                                                                                                                                                                                                                                                                                             | 63,732                  | 1.00<br>(1.00,1.01)                 | 0.90           | 1.01<br>(1.00,1.01)     | 0.94           | 1.02<br>(1.00,1.04)                   | 0.71           | 1.02<br>(1.00,1.04)     | 0.67           |
| OBR-cancers                                                                                                                                                                                                                                                                                                                                                                                                                                                                                                                                                                                                                                | 36,509                  | 1.00<br>(1.00,1.01)                 | 0.92           | 1.01<br>(1.00,1.01)     | 0.92           | 1.03<br>(1.01,1.06)                   | 0.78           | 1.04<br>(1.01,1.07)     | 0.84           |
| NOR-cancers                                                                                                                                                                                                                                                                                                                                                                                                                                                                                                                                                                                                                                | 24,499                  | 1.00<br>(0.99,1.01)                 | 0.87           | 1.00<br>(0.99,1.01)     | 0.87           | 0.99<br>(0.93,1.05)                   | 0.85           | 1.00<br>(0.95,1.05)     | 0.79           |
| NOR-cancers excluding lung                                                                                                                                                                                                                                                                                                                                                                                                                                                                                                                                                                                                                 | 16,352                  | 1.00<br>(0.99,1.01)                 | 0.80           | 1.00<br>(0.99,1.01)     | 0.83           | 1.03<br>(1.00,1.06)                   | 0.46           | 1.03<br>(1.01,1.05)     | 0.21           |
| <b>Specific cancer sites</b>                                                                                                                                                                                                                                                                                                                                                                                                                                                                                                                                                                                                               |                         |                                     |                |                         |                |                                       |                |                         |                |
| Colorectal                                                                                                                                                                                                                                                                                                                                                                                                                                                                                                                                                                                                                                 | 6,251                   | 1.01<br>(1.00,1.01)                 | 0.00           | 1.01<br>(1.00,1.01)     | 0.00           | 1.05<br>(1.01,1.09)                   | 0.45           | 1.05<br>(1.01,1.09)     | 0.35           |
| Pancreas                                                                                                                                                                                                                                                                                                                                                                                                                                                                                                                                                                                                                                   | 2,019                   | 1.00<br>(0.99,1.02)                 | 0.46           | 1.01<br>(0.99,1.02)     | 0.46           | 1.06<br>(0.98,1.15)                   | 0.53           | 1.07<br>(0.98,1.15)     | 0.49           |
| Kidney                                                                                                                                                                                                                                                                                                                                                                                                                                                                                                                                                                                                                                     | 1,270                   | 1.01<br>(0.99,1.03)                 | 0.84           | 1.01<br>(0.99,1.03)     | 0.84           | 1.16<br>(1.00,1.35)                   | 0.73           | 1.15<br>(0.99,1.33)     | 0.72           |
| Lung                                                                                                                                                                                                                                                                                                                                                                                                                                                                                                                                                                                                                                       | 8,114                   | 0.99<br>(0.98,1.00)                 | 0.70           | 0.99<br>(0.98,1.01)     | 0.78           | 0.95<br>(0.89,1.02)                   | 0.82           | 0.97<br>(0.9,1.04)      | 0.84           |
| Endometrial                                                                                                                                                                                                                                                                                                                                                                                                                                                                                                                                                                                                                                | 3,931                   | 1.02<br>(1.01,1.04)                 | 0.91           | 1.02<br>(1.00,1.04)     | 0.91           | 1.15<br>(1.00,1.32)                   | 0.95           | 1.14<br>(0.99,1.31)     | 0.95           |
| Ovarian                                                                                                                                                                                                                                                                                                                                                                                                                                                                                                                                                                                                                                    | 2,717                   | 1.01<br>(1.00,1.01)                 | 0.00           | 1.01<br>(1.00,1.02)     | 0.35           | 1.02<br>(0.98,1.05)                   | 0.00           | 1.01<br>(0.98,1.05)     | 0.00           |
| Post-menopausal breast cancer                                                                                                                                                                                                                                                                                                                                                                                                                                                                                                                                                                                                              | 17,582                  | 1.00<br>(0.99, 1.00)                | 0.80           | 1.00<br>(0.99,1.01)     | 0.91           | 0.99<br>(0.95,1.03)                   | 0.83           | 1.00<br>(0.96,1.04)     | 0.83           |
| <p>*Multivariable adjusted models: baseline age, ethnicity, alcohol, smoking, HRT.<br/> † The sum of OBR and NOR cancer does not equal total cancers as non-melanoma skin cancers were excluded in the EPIC cohort analyses.<br/> Degree of overweight is the cumulative sum of the number of BMI units <math>\geq 25</math> kg/m<sup>2</sup><br/> Duration of overweight is the cumulative sum of the duration overweight (BMI <math>\geq 25</math> kg/m<sup>2</sup>).<br/> <b>Abbreviations:</b> OBR, obesity-related; NOR, non-obesity-related; CI, confidence interval; HR, hazard ratio; BMI, body mass index; MV, multivariable.</p> |                         |                                     |                |                         |                |                                       |                |                         |                |

**Table S10: Comparison of the overweight-years metric and BMI using Harrell’s C-statistic.**

| Characteristic                                                                                                                                                                                                                                                                                                                                                          | C-statistic overweight - years with BMI (95% CI) | Difference in c-statistic between overweight-years with BMI combined compared with overweight-years (95% CI) | Difference in c-statistic between overweight-years with BMI combined and BMI (95% CI) |
|-------------------------------------------------------------------------------------------------------------------------------------------------------------------------------------------------------------------------------------------------------------------------------------------------------------------------------------------------------------------------|--------------------------------------------------|--------------------------------------------------------------------------------------------------------------|---------------------------------------------------------------------------------------|
| <b>Men</b>                                                                                                                                                                                                                                                                                                                                                              |                                                  |                                                                                                              |                                                                                       |
| Total Cancers                                                                                                                                                                                                                                                                                                                                                           | 0.599 (0.564,0.633)                              | -0.001 (-0.002,0.001)                                                                                        | -0.001 (-0.002,0.001)                                                                 |
| OBR-cancers                                                                                                                                                                                                                                                                                                                                                             | 0.612 (0.577,0.646)                              | -0.000 (-0.002,0.001)                                                                                        | 0.001 (0.000,0.001)                                                                   |
| NOR-cancers                                                                                                                                                                                                                                                                                                                                                             | 0.595 (0.544,0.645)                              | 0.001 (-0.001,0.002)                                                                                         | 0.001 (-0.001,0.003)                                                                  |
| NOR-cancers excluding lung and prostate                                                                                                                                                                                                                                                                                                                                 | 0.604 (0.522,0.680)                              | -0.000 (-0.001,0.000)                                                                                        | 0.000 (-0.001,0.001)                                                                  |
| <b>Specific cancer sites</b>                                                                                                                                                                                                                                                                                                                                            |                                                  |                                                                                                              |                                                                                       |
| Colorectal                                                                                                                                                                                                                                                                                                                                                              | 0.641 (0.629,0.654)                              | -0.001 (-0.002,0.001)                                                                                        | 0.000 (-0.000,0.001)                                                                  |
| Pancreas                                                                                                                                                                                                                                                                                                                                                                | 0.610 (0.563,0.656)                              | -0.000 (-0.002,0.002)                                                                                        | 0.003 (-0.001,0.006)                                                                  |
| Kidney                                                                                                                                                                                                                                                                                                                                                                  | 0.601 (0.580,0.622)                              | 0.006 (0.001,0.011)                                                                                          | 0.001 (-0.001,0.003)                                                                  |
| Bladder                                                                                                                                                                                                                                                                                                                                                                 | 0.680 (0.613,0.740)                              | 0.000 (-0.005,0.006)                                                                                         | 0.000 (-0.005,0.006)                                                                  |
| Lung                                                                                                                                                                                                                                                                                                                                                                    | 0.727 (0.693,0.758)                              | 0.004 (0.002,0.005)                                                                                          | 0.003 (0.002,0.005)                                                                   |
| Prostate                                                                                                                                                                                                                                                                                                                                                                | 0.607 (0.588,0.626)                              | -0.001 (-0.002,0.001)                                                                                        | -0.001 (-0.002,0.000)                                                                 |
| <b>Women</b>                                                                                                                                                                                                                                                                                                                                                            |                                                  |                                                                                                              |                                                                                       |
| Total Cancers                                                                                                                                                                                                                                                                                                                                                           | 0.582 (0.559,0.604)                              | 0.001 (-0.003,0.004)                                                                                         | 0.001 (-0.004,0.005)                                                                  |
| OBR-cancers                                                                                                                                                                                                                                                                                                                                                             | 0.576 (0.549,0.603)                              | 0.004 (-0.001,0.009)                                                                                         | 0.001 (-0.003,0.005)                                                                  |
| NOR-cancers                                                                                                                                                                                                                                                                                                                                                             | 0.641 (0.576,0.701)                              | 0.002 (-0.001,0.005)                                                                                         | 0.001 (-0.002,0.003)                                                                  |
| NOR-cancers excluding lung                                                                                                                                                                                                                                                                                                                                              | 0.598 (0.553,0.642)                              | 0.001 (-0.001,0.004)                                                                                         | 0.001 (-0.002,0.003)                                                                  |
| <b>Specific cancer sites</b>                                                                                                                                                                                                                                                                                                                                            |                                                  |                                                                                                              |                                                                                       |
| Colorectal                                                                                                                                                                                                                                                                                                                                                              | 0.627 (0.585,0.668)                              | 0.000 (-0.000,0.001)                                                                                         | 0.001 (-0.001,0.002)                                                                  |
| Pancreas                                                                                                                                                                                                                                                                                                                                                                | 0.638 (0.587,0.685)                              | 0.001 (-0.001,0.004)                                                                                         | 0.000 (-0.001,0.001)                                                                  |
| Kidney                                                                                                                                                                                                                                                                                                                                                                  | 0.626 (0.600,0.650)                              | 0.013 (0.000,0.026)                                                                                          | -0.001 (-0.003,0.001)                                                                 |
| Lung                                                                                                                                                                                                                                                                                                                                                                    | 0.746 (0.701,0.785)                              | 0.001 (-0.002,0.004)                                                                                         | 0.000 (-0.001,0.002)                                                                  |
| Endometrial                                                                                                                                                                                                                                                                                                                                                             | 0.626 (0.579,0.671)                              | 0.010 (0.001,0.018)                                                                                          | -0.000 (-0.004,0.004)                                                                 |
| Ovarian                                                                                                                                                                                                                                                                                                                                                                 | 0.585 (0.543,0.626)                              | 0.000 (-0.000,0.000)                                                                                         | 0.001 (-0.002,0.004)                                                                  |
| Post-menopausal breast cancer                                                                                                                                                                                                                                                                                                                                           | 0.606 (0.506,0.698)                              | 0.003 (-0.001,0.006)                                                                                         | -0.000 (-0.003,0.002)                                                                 |
| <p><b>Key:</b> Green – significant difference in C-statistic.<br/>                     *All models were multivariable adjusted, including baseline age, ethnicity, alcohol, smoking, HRT.<br/> <b>Abbreviations:</b> SE, standard error; OBR, obesity-related; NOR, non-obesity-related; BMI, body mass index; CI, confidence interval; MV, multivariable-adjusted.</p> |                                                  |                                                                                                              |                                                                                       |

a) Analysis of obese-years exposure

Table S11: Hazard ratio of specific cancers per standard deviation obese-years and BMI, ABACus 2 Consortium.

| Outcomes                                                                                                                                                                          | Number of cancer events | Obese-years (per SD)     |                |                         |                | BMI (per SD)             |                |                         |                |
|-----------------------------------------------------------------------------------------------------------------------------------------------------------------------------------|-------------------------|--------------------------|----------------|-------------------------|----------------|--------------------------|----------------|-------------------------|----------------|
|                                                                                                                                                                                   |                         | Age-adjusted HR (95% CI) | I <sup>2</sup> | MV-adjusted HR (95% CI) | I <sup>2</sup> | Age-adjusted HR (95% CI) | I <sup>2</sup> | MV-adjusted HR (95% CI) | I <sup>2</sup> |
| <b>Men</b>                                                                                                                                                                        |                         |                          |                |                         |                |                          |                |                         |                |
| †Total Cancers                                                                                                                                                                    | 85,341                  | 1.01<br>(0.98,1.05)      | 0.75           | 1.01<br>(0.98,1.05)     | 0.74           | 1.01<br>(0.99,1.03)      | 0.34           | 1.01<br>(0.98,1.04)     | 0.66           |
| OBR-cancers                                                                                                                                                                       | 12,959                  | 1.09<br>(1.07,1.11)      | 0.00           | 1.09<br>(1.07,1.11)     | 0.00           | 1.17<br>(1.16,1.18)      | 0.00           | 1.16<br>(1.15,1.18)     | 0.00           |
| NOR-cancers                                                                                                                                                                       | 64,743                  | 0.99<br>(0.97,1.01)      | 0.33           | 0.98<br>(0.95,1.01)     | 0.67           | 0.98<br>(0.97,0.99)      | 0.00           | 0.97<br>(0.96,0.99)     | 0.35           |
| NOR-cancers excluding lung and prostate                                                                                                                                           | 26,178                  | 1.03<br>(0.98,1.09)      | 0.61           | 1.03<br>(0.98,1.09)     | 0.60           | 1.04<br>(1.02,1.05)      | 0.00           | 1.03 (1,1.07)           | 0.25           |
| <b>Specific cancer sites</b>                                                                                                                                                      |                         |                          |                |                         |                |                          |                |                         |                |
| Colorectal                                                                                                                                                                        | 6,037                   | 1.09<br>(0.99,1.20)      | 0.69           | 1.09<br>(0.99,1.20)     | 0.69           | 1.14<br>(1.10,1.18)      | 0.15           | 1.14<br>(1.09,1.18)     | 0.21           |
| Pancreas                                                                                                                                                                          | 1,957                   | 1.04<br>(0.99,1.10)      | 0.00           | 1.04<br>(0.99,1.10)     | 0.00           | 1.07<br>(1.02,1.12)      | 0.00           | 1.08<br>(1.02,1.14)     | 0.00           |
| Kidney                                                                                                                                                                            | 1,967                   | 1.11<br>(1.07,1.16)      | 0.00           | 1.10<br>(1.06,1.15)     | 0.00           | 1.25<br>(1.15,1.36)      | 0.19           | 1.25<br>(1.15,1.35)     | 0.14           |
| Bladder                                                                                                                                                                           | 4,018                   | 1.05<br>(0.96,1.14)      | 0.56           | 1.05<br>(0.97,1.14)     | 0.47           | 1.08<br>(1.03,1.13)      | 0.00           | 1.06<br>(1.01,1.12)     | 0.00           |
| Lung                                                                                                                                                                              | 8,559                   | 0.97<br>(0.94,1.00)      | 0.00           | 0.97<br>(0.93,1.01)     | 0.00           | 0.87<br>(0.77,0.98)      | 0.83           | 0.85<br>(0.77,0.93)     | 0.82           |
| Prostate                                                                                                                                                                          | 30,006                  | 0.96<br>(0.93,0.98)      | 0.33           | 0.96<br>(0.93,0.98)     | 0.18           | 0.97<br>(0.91,1.04)      | 0.85           | 0.97<br>(0.92,1.03)     | 0.78           |
| <b>Women</b>                                                                                                                                                                      |                         |                          |                |                         |                |                          |                |                         |                |
| †Total Cancers                                                                                                                                                                    | 63,732                  | 1.03<br>(1.00,1.05)      | 0.7            | 1.04<br>(1.02,1.05)     | 0.48           | 1.04<br>(1.00,1.09)      | 0.83           | 1.06<br>(1.01,1.11)     | 0.85           |
| OBR-cancers                                                                                                                                                                       | 36,509                  | 1.06<br>(1.02,1.09)      | 0.74           | 1.06<br>(1.03,1.10)     | 0.75           | 1.10<br>(1.07,1.14)      | 0.72           | 1.11<br>(1.07,1.15)     | 0.79           |
| NOR-cancers                                                                                                                                                                       | 24,499                  | 0.96<br>(0.91,1.00)      | 0.66           | 0.97<br>(0.93,1.02)     | 0.68           | 0.91<br>(0.83,1.01)      | 0.91           | 0.94<br>(0.84,1.04)     | 0.90           |
| NOR-cancers excluding lung                                                                                                                                                        | 16,352                  | 1.00<br>(0.98,1.02)      | 0.00           | 1.02<br>(0.99,1.04)     | 0.00           | 0.99<br>(0.92,1.05)      | 0.69           | 1.01<br>(0.93,1.09)     | 0.65           |
| <b>Specific cancer sites</b>                                                                                                                                                      |                         |                          |                |                         |                |                          |                |                         |                |
| Colorectal                                                                                                                                                                        | 6,251                   | 1.06<br>(1.04,1.08)      | 0.00           | 1.06<br>(1.04,1.08)     | 0.00           | 1.09<br>(1.03,1.14)      | 0.47           | 1.07<br>(1.03,1.12)     | 0.28           |
| Pancreas                                                                                                                                                                          | 2,019                   | 1.02<br>(0.89,1.18)      | 0.65           | 1.01<br>(0.91,1.13)     | 0.51           | 1.02<br>(0.95,1.09)      | 0.13           | 1.02<br>(0.98,1.06)     | 0.00           |
| Kidney                                                                                                                                                                            | 1,270                   | 1.14<br>(1.08,1.21)      | 0.00           | 1.13<br>(1.07,1.19)     | 0.00           | 1.33<br>(1.13,1.56)      | 0.87           | 1.31<br>(1.11,1.54)     | 0.86           |
| Lung                                                                                                                                                                              | 8,114                   | 0.90<br>(0.85,0.96)      | 0.45           | 0.93<br>(0.88,0.97)     | 0.22           | 0.85<br>(0.79,0.91)      | 0.67           | 0.87<br>(0.81,0.93)     | 0.61           |
| Endometrial                                                                                                                                                                       | 3,931                   | 1.18<br>(1.11,1.26)      | 0.85           | 1.18<br>(1.10,1.27)     | 0.80           | 1.35<br>(1.18,1.55)      | 0.92           | 1.38<br>(1.17,1.64)     | 0.94           |
| Ovarian                                                                                                                                                                           | 2,717                   | 1.01<br>(0.96,1.06)      | 0.00           | 1.02<br>(0.97,1.06)     | 0.00           | 0.99<br>(0.88,1.11)      | 0.74           | 1.00<br>(0.90,1.11)     | 0.67           |
| Post-menopausal breast cancer                                                                                                                                                     | 17,582                  | 1.01<br>(0.96,1.05)      | 0.60           | 1.02<br>(0.97,1.06)     | 0.61           | 1.05<br>(1.01,1.10)      | 0.58           | 1.07<br>(1.02,1.12)     | 0.58           |
| *Multivariable adjusted models: baseline age, ethnicity, alcohol, smoking, HRT.                                                                                                   |                         |                          |                |                         |                |                          |                |                         |                |
| † The sum of OBR and NOR cancer does not equal total cancers as non-melanoma skin cancers were excluded in the EPIC cohort analyses.                                              |                         |                          |                |                         |                |                          |                |                         |                |
| <b>Abbreviations:</b> OBR, obesity-related; NOR, non-obesity-related; CI, confidence interval; HR, hazard ratio; BMI, body mass index; MV, multivariable; SD, standard deviation. |                         |                          |                |                         |                |                          |                |                         |                |

**Table S12: Hazard ratio of specific cancers per 100 obese-years and per 5-unit BMI, ABACus 2 Consortium.**

| Outcomes                                                                                                                                                                          | Number of cancer events | Obese-years (per 100 kg-years/m <sup>2</sup> ) |                |                         |                | BMI (per 5 units)        |                |                         |                |
|-----------------------------------------------------------------------------------------------------------------------------------------------------------------------------------|-------------------------|------------------------------------------------|----------------|-------------------------|----------------|--------------------------|----------------|-------------------------|----------------|
|                                                                                                                                                                                   |                         | Age-adjusted HR (95% CI)                       | I <sup>2</sup> | MV-adjusted HR (95% CI) | I <sup>2</sup> | Age-adjusted HR (95% CI) | I <sup>2</sup> | MV-adjusted HR (95% CI) | I <sup>2</sup> |
| <b>Men</b>                                                                                                                                                                        |                         |                                                |                |                         |                |                          |                |                         |                |
| †Total Cancers                                                                                                                                                                    | 85,341                  | 1.07<br>(0.93,1.22)                            | 0.75           | 1.06<br>(0.92,1.23)     | 0.78           | 1.01<br>(0.99,1.03)      | 0.35           | 1.01<br>(0.98,1.05)     | 0.61           |
| OBR-cancers                                                                                                                                                                       | 12,959                  | 1.34<br>(1.23,1.46)                            | 0.34           | 1.35<br>(1.25,1.45)     | 0.20           | 1.20<br>(1.18,1.22)      | 0.00           | 1.20<br>(1.19,1.21)     | 0.00           |
| NOR-cancers                                                                                                                                                                       | 64,743                  | 0.95<br>(0.88,1.03)                            | 0.39           | 0.95<br>(0.87,1.03)     | 0.52           | 0.97<br>(0.96,0.98)      | 0.00           | 0.96<br>(0.94,0.99)     | 0.17           |
| NOR-cancers excluding lung and prostate                                                                                                                                           | 26,178                  | 1.13<br>(0.86,1.48)                            | 0.63           | 1.13<br>(0.86,1.49)     | 0.65           | 1.05<br>(1.03,1.07)      | 0.00           | 1.04<br>(1.01,1.08)     | 0.00           |
| <b>Specific cancer sites</b>                                                                                                                                                      |                         |                                                |                |                         |                |                          |                |                         |                |
| Colorectal                                                                                                                                                                        | 6,037                   | 1.42<br>(0.96,2.08)                            | 0.70           | 1.41<br>(0.97,2.06)     | 0.69           | 1.17<br>(1.12,1.23)      | 0.18           | 1.17<br>(1.12,1.23)     | 0.08           |
| Pancreas                                                                                                                                                                          | 1,957                   | 1.11<br>(0.89,1.39)                            | 0.00           | 1.11<br>(0.89,1.39)     | 0.00           | 1.09<br>(0.97,1.21)      | 0.00           | 1.09<br>(0.98,1.21)     | 0.00           |
| Kidney                                                                                                                                                                            | 1,967                   | 1.43<br>(1.24,1.65)                            | 0.00           | 1.41<br>(1.21,1.64)     | 0.00           | 1.31<br>(1.18,1.45)      | 0.22           | 1.30<br>(1.17,1.44)     | 0.22           |
| Bladder                                                                                                                                                                           | 4,018                   | 1.22<br>(0.80,1.86)                            | 0.66           | 1.23<br>(0.79,1.90)     | 0.66           | 1.09<br>(1.03,1.16)      | 0.00           | 1.07<br>(1.00,1.15)     | 0.00           |
| Lung                                                                                                                                                                              | 8,559                   | 0.90<br>(0.81,1.00)                            | 0.00           | 0.89<br>(0.78,1.02)     | 0.00           | 0.84<br>(0.72,0.98)      | 0.84           | 0.81<br>(0.71,0.93)     | 0.83           |
| Prostate                                                                                                                                                                          | 30,006                  | 0.84<br>(0.78,0.91)                            | 0.03           | 0.84<br>(0.79,0.90)     | 0.00           | 0.97<br>(0.89,1.05)      | 0.82           | 0.97<br>(0.90,1.03)     | 0.73           |
| <b>Women</b>                                                                                                                                                                      |                         |                                                |                |                         |                |                          |                |                         |                |
| †Total Cancers                                                                                                                                                                    | 63,732                  | 1.08<br>(1.03,1.13)                            | 0.75           | 1.10 (1.06,1.14)        | 0.55           | 1.04<br>(1.00,1.08)      | 0.85           | 1.05<br>(1.02,1.09)     | 0.83           |
| OBR-cancers                                                                                                                                                                       | 36,509                  | 1.15<br>(1.11,1.20)                            | 0.42           | 1.16 (1.12,1.20)        | 0.25           | 1.10<br>(1.07,1.12)      | 0.74           | 1.10<br>(1.07,1.14)     | 0.82           |
| NOR-cancers                                                                                                                                                                       | 24,499                  | 0.96<br>(0.94,0.98)                            | 0.00           | 1.00 (0.97,1.02)        | 0.00           | 0.93<br>(0.85,1.03)      | 0.81           | 0.95<br>(0.85,1.06)     | 0.84           |
| NOR-cancers excluding lung                                                                                                                                                        | 16,352                  | 1.03<br>(0.97,1.11)                            | 0.48           | 1.06 (1.01,1.11)        | 0.06           | 0.99<br>(0.94,1.04)      | 0.67           | 1.00<br>(0.95,1.05)     | 0.62           |
| <b>Specific cancer sites</b>                                                                                                                                                      |                         |                                                |                |                         |                |                          |                |                         |                |
| Colorectal                                                                                                                                                                        | 6,251                   | 1.15<br>(1.08,1.22)                            | 0.00           | 1.13 (1.07,1.19)        | 0.00           | 1.08<br>(1.04,1.12)      | 0.33           | 1.07<br>(1.04,1.11)     | 0.10           |
| Pancreas                                                                                                                                                                          | 2,019                   | 1.07<br>(0.79,1.45)                            | 0.68           | 1.04 (0.81,1.35)        | 0.55           | 1.02<br>(0.96,1.08)      | 0.16           | 1.02<br>(0.98,1.06)     | 0.00           |
| Kidney                                                                                                                                                                            | 1,270                   | 1.32<br>(1.17,1.49)                            | 0.00           | 1.29 (1.17,1.42)        | 0.00           | 1.28<br>(1.1,1.49)       | 0.88           | 1.27<br>(1.09,1.47)     | 0.87           |
| Lung                                                                                                                                                                              | 8,114                   | 0.78<br>(0.66,0.92)                            | 0.71           | 0.82 (0.71,0.96)        | 0.59           | 0.86<br>(0.79,0.94)      | 0.75           | 0.88<br>(0.81,0.96)     | 0.73           |
| Endometrial                                                                                                                                                                       | 3,931                   | 1.55<br>(1.31,1.84)                            | 0.93           | 1.56 (1.33,1.82)        | 0.89           | 1.33<br>(1.16,1.52)      | 0.94           | 1.36<br>(1.16,1.59)     | 0.95           |
| Ovarian                                                                                                                                                                           | 2,717                   | 0.99<br>(0.89,1.11)                            | 0.00           | 1.02 (0.92,1.14)        | 0.00           | 0.99<br>(0.89,1.1)       | 0.70           | 1.01<br>(0.91,1.12)     | 0.69           |
| Post-menopausal breast cancer                                                                                                                                                     | 17,582                  | 1.02<br>(0.93,1.13)                            | 0.45           | 1.06 (0.95,1.18)        | 0.48           | 1.05<br>(1.00,1.10)      | 0.61           | 1.07<br>(1.01,1.13)     | 0.72           |
| *Multivariable adjusted models: baseline age, ethnicity, alcohol, smoking, HRT.                                                                                                   |                         |                                                |                |                         |                |                          |                |                         |                |
| † The sum of OBR and NOR cancer does not equal total cancers as non-melanoma skin cancers were excluded in the EPIC cohort analyses.                                              |                         |                                                |                |                         |                |                          |                |                         |                |
| <b>Abbreviations:</b> OBR, obesity-related; NOR, non-obesity-related; CI, confidence interval; HR, hazard ratio; BMI, body mass index; MV, multivariable; SD, standard deviation. |                         |                                                |                |                         |                |                          |                |                         |                |

**Table S13: Comparison of the obesity degree and duration per unit standard deviation, ABACus 2 Consortium.**

| Outcomes                                                                                                                                                                                                                                                                                                                                                                                                                                                                                                                                                                                                                                   | Number of cancer events | Degree of Obese (per SD) |                |                         |                | Duration of Obese (per SD) |                |                         |                |
|--------------------------------------------------------------------------------------------------------------------------------------------------------------------------------------------------------------------------------------------------------------------------------------------------------------------------------------------------------------------------------------------------------------------------------------------------------------------------------------------------------------------------------------------------------------------------------------------------------------------------------------------|-------------------------|--------------------------|----------------|-------------------------|----------------|----------------------------|----------------|-------------------------|----------------|
|                                                                                                                                                                                                                                                                                                                                                                                                                                                                                                                                                                                                                                            |                         | Age-adjusted HR (95% CI) | I <sup>2</sup> | MV-adjusted HR (95% CI) | I <sup>2</sup> | Age-adjusted HR (95% CI)   | I <sup>2</sup> | MV-adjusted HR (95% CI) | I <sup>2</sup> |
| <b>Men</b>                                                                                                                                                                                                                                                                                                                                                                                                                                                                                                                                                                                                                                 |                         |                          |                |                         |                |                            |                |                         |                |
| †Total Cancers                                                                                                                                                                                                                                                                                                                                                                                                                                                                                                                                                                                                                             | 85,341                  | 1.01 (0.98,1.05)         | 0.73           | 1.01 (0.98,1.05)        | 0.72           | 1.02 (0.98,1.05)           | 0.65           | 1.02 (0.98,1.05)        | 0.79           |
| OBR-cancers                                                                                                                                                                                                                                                                                                                                                                                                                                                                                                                                                                                                                                | 12,959                  | 1.06 (0.99,1.15)         | 0.91           | 1.06 (1.00,1.14)        | 0.88           | 1.08 (1.01,1.16)           | 0.86           | 1.08 (1.01,1.16)        | 0.86           |
| NOR-cancers                                                                                                                                                                                                                                                                                                                                                                                                                                                                                                                                                                                                                                | 64,743                  | 0.99 (0.96,1.02)         | 0.61           | 0.99 (0.95,1.03)        | 0.85           | 1.00 (0.96,1.04)           | 0.81           | 1.00 (0.96,1.04)        | 0.81           |
| NOR-cancers excluding lung and prostate                                                                                                                                                                                                                                                                                                                                                                                                                                                                                                                                                                                                    | 26,178                  | 1.02 (0.97,1.08)         | 0.55           | 1.02 (0.96,1.09)        | 0.58           | 1.02 (1.00,1.04)           | 0.00           | 1.02 (1.00,1.04)        | 0.00           |
| <b>Specific cancer sites</b>                                                                                                                                                                                                                                                                                                                                                                                                                                                                                                                                                                                                               |                         |                          |                |                         |                |                            |                |                         |                |
| Colorectal                                                                                                                                                                                                                                                                                                                                                                                                                                                                                                                                                                                                                                 | 6,037                   | 1.06 (0.98,1.14)         | 0.68           | 1.05 (0.97,1.14)        | 0.66           | 1.08 (0.98,1.20)           | 0.74           | 1.08 (0.99,1.17)        | 0.65           |
| Pancreas                                                                                                                                                                                                                                                                                                                                                                                                                                                                                                                                                                                                                                   | 1,957                   | 1.02 (0.91,1.14)         | 0.40           | 1.02 (0.91,1.14)        | 0.40           | 1.06 (1.00,1.12)           | 0.00           | 1.06 (1.00,1.12)        | 0.00           |
| Kidney                                                                                                                                                                                                                                                                                                                                                                                                                                                                                                                                                                                                                                     | 1,967                   | 1.03 (0.92,1.16)         | 0.33           | 1.03 (0.92,1.16)        | 0.32           | 1.06 (0.92,1.23)           | 0.40           | 1.06 (0.93,1.20)        | 0.26           |
| Bladder                                                                                                                                                                                                                                                                                                                                                                                                                                                                                                                                                                                                                                    | 4,018                   | 1.02 (0.81,1.28)         | 0.83           | 1.03 (0.85,1.26)        | 0.77           | 1.04 (0.94,1.15)           | 0.00           | 1.04 (0.96,1.12)        | 0.00           |
| Lung                                                                                                                                                                                                                                                                                                                                                                                                                                                                                                                                                                                                                                       | 8,559                   | 1.00 (0.92,1.08)         | 0.57           | 1.01 (0.9,1.13)         | 0.81           | 1.01 (0.88,1.16)           | 0.81           | 1.01 (0.86,1.20)        | 0.91           |
| Prostate                                                                                                                                                                                                                                                                                                                                                                                                                                                                                                                                                                                                                                   | 30,006                  | 0.98 (0.94,1.01)         | 0.51           | 0.97 (0.94,1.00)        | 0.16           | 0.97 (0.94,1.01)           | 0.53           | 0.97 (0.94,1.01)        | 0.49           |
| <b>Women</b>                                                                                                                                                                                                                                                                                                                                                                                                                                                                                                                                                                                                                               |                         |                          |                |                         |                |                            |                |                         |                |
| †Total Cancers                                                                                                                                                                                                                                                                                                                                                                                                                                                                                                                                                                                                                             | 63,732                  | 1.03 (1.02,1.04)         | 0.00           | 1.03 (1.02,1.04)        | 0.00           | 1.03 (1.02,1.04)           | 0.00           | 1.04 (1.03,1.05)        | 0.00           |
| OBR-cancers                                                                                                                                                                                                                                                                                                                                                                                                                                                                                                                                                                                                                                | 36,509                  | 1.03 (1.02,1.05)         | 0.31           | 1.04 (1.02,1.07)        | 0.64           | 1.05 (1.02,1.07)           | 0.56           | 1.05 (1.02,1.08)        | 0.67           |
| NOR-cancers                                                                                                                                                                                                                                                                                                                                                                                                                                                                                                                                                                                                                                | 24,499                  | 1.01 (0.96,1.06)         | 0.78           | 1.02 (0.97,1.06)        | 0.72           | 1.00 (0.94,1.05)           | 0.81           | 1.01 (0.96,1.06)        | 0.77           |
| NOR-cancers excluding lung                                                                                                                                                                                                                                                                                                                                                                                                                                                                                                                                                                                                                 | 16,352                  | 1.03 (0.98,1.08)         | 0.55           | 1.04 (1.00,1.09)        | 0.46           | 1.02 (0.97,1.08)           | 0.67           | 1.03 (0.98,1.08)        | 0.57           |
| <b>Specific cancer sites</b>                                                                                                                                                                                                                                                                                                                                                                                                                                                                                                                                                                                                               |                         |                          |                |                         |                |                            |                |                         |                |
| Colorectal                                                                                                                                                                                                                                                                                                                                                                                                                                                                                                                                                                                                                                 | 6,251                   | 1.05 (1.01,1.09)         | 0.23           | 1.04 (1.01,1.07)        | 0.00           | 1.05 (1.02,1.09)           | 0.00           | 1.05 (1.02,1.08)        | 0.00           |
| Pancreas                                                                                                                                                                                                                                                                                                                                                                                                                                                                                                                                                                                                                                   | 2,019                   | 0.99 (0.88,1.12)         | 0.50           | 1.00 (0.88,1.13)        | 0.52           | 1.00 (0.86,1.17)           | 0.60           | 1.01 (0.86,1.19)        | 0.62           |
| Kidney                                                                                                                                                                                                                                                                                                                                                                                                                                                                                                                                                                                                                                     | 1,270                   | 1.06 (0.95,1.19)         | 0.51           | 1.05 (0.94,1.18)        | 0.55           | 1.12 (0.95,1.31)           | 0.67           | 1.10 (0.94,1.29)        | 0.69           |
| Lung                                                                                                                                                                                                                                                                                                                                                                                                                                                                                                                                                                                                                                       | 8,114                   | 0.95 (0.88,1.03)         | 0.52           | 0.96 (0.90,1.03)        | 0.44           | 0.95 (0.88,1.03)           | 0.66           | 0.97 (0.89,1.05)        | 0.68           |
| Endometrial                                                                                                                                                                                                                                                                                                                                                                                                                                                                                                                                                                                                                                | 3,931                   | 1.13 (1.06,1.21)         | 0.69           | 1.14 (1.07,1.21)        | 0.70           | 1.20 (1.07,1.35)           | 0.79           | 1.21 (1.09,1.34)        | 0.75           |
| Ovarian                                                                                                                                                                                                                                                                                                                                                                                                                                                                                                                                                                                                                                    | 2,717                   | 1.04 (1.01,1.07)         | 0.00           | 1.04 (1.01,1.08)        | 0.00           | 1.08 (1.03,1.12)           | 0.00           | 1.08 (1.04,1.13)        | 0.00           |
| Post-menopausal breast cancer                                                                                                                                                                                                                                                                                                                                                                                                                                                                                                                                                                                                              | 17,582                  | 0.99 (0.95,1.03)         | 0.68           | 1.00 (0.96,1.04)        | 0.69           | 1.00 (0.96,1.04)           | 0.60           | 1.01 (0.96,1.06)        | 0.76           |
| <p>*Multivariable adjusted models: baseline age, ethnicity, alcohol, smoking, HRT.<br/> † The sum of OBR and NOR cancer does not equal total cancers as non-melanoma skin cancers were excluded in the EPIC cohort analyses.<br/> Degree of overweight is the cumulative sum of the number of BMI units <math>\geq 30</math> kg/m<sup>2</sup><br/> Duration of overweight is the cumulative sum of the duration overweight (BMI <math>\geq 30</math> kg/m<sup>2</sup>).<br/> <b>Abbreviations:</b> OBR, obesity-related; NOR, non-obesity-related; CI, confidence interval; HR, hazard ratio; BMI, body mass index; MV, multivariable.</p> |                         |                          |                |                         |                |                            |                |                         |                |

**Table S14: Comparison of the obesity degree and duration per 10 units and per 10 years respectively, ABACus 2 Consortium.**

| Outcomes                                                                                                                                                                                                                                                                                                                                                                                                                                                                                                                                                                                                                                   | Number of cancer events | Degree of Obese (per 10 units) |                |                         |                | Duration of Obese (per 10 years) |                |                         |                |
|--------------------------------------------------------------------------------------------------------------------------------------------------------------------------------------------------------------------------------------------------------------------------------------------------------------------------------------------------------------------------------------------------------------------------------------------------------------------------------------------------------------------------------------------------------------------------------------------------------------------------------------------|-------------------------|--------------------------------|----------------|-------------------------|----------------|----------------------------------|----------------|-------------------------|----------------|
|                                                                                                                                                                                                                                                                                                                                                                                                                                                                                                                                                                                                                                            |                         | Age-adjusted HR (95% CI)       | I <sup>2</sup> | MV-adjusted HR (95% CI) | I <sup>2</sup> | Age-adjusted HR (95% CI)         | I <sup>2</sup> | MV-adjusted HR (95% CI) | I <sup>2</sup> |
| <b>Men</b>                                                                                                                                                                                                                                                                                                                                                                                                                                                                                                                                                                                                                                 |                         |                                |                |                         |                |                                  |                |                         |                |
| †Total Cancers                                                                                                                                                                                                                                                                                                                                                                                                                                                                                                                                                                                                                             | 85,341                  | 1.01 (0.99,1.03)               | 0.84           | 1.00 (1.00,1.01)        | 0.36           | 1.03 (0.98,1.08)                 | 0.70           | 1.02 (0.97,1.08)        | 0.78           |
| OBR-cancers                                                                                                                                                                                                                                                                                                                                                                                                                                                                                                                                                                                                                                | 12,959                  | 1.03 (0.99,1.06)               | 0.93           | 1.03 (0.99,1.06)        | 0.93           | 1.12 (1.02,1.23)                 | 0.87           | 1.12 (1.03,1.23)        | 0.84           |
| NOR-cancers                                                                                                                                                                                                                                                                                                                                                                                                                                                                                                                                                                                                                                | 64,743                  | 1.00 (0.99,1.01)               | 0.67           | 1.00 (0.99,1.01)        | 0.62           | 1.00 (0.94,1.06)                 | 0.82           | 0.99 (0.94,1.05)        | 0.81           |
| NOR-cancers excluding lung and prostate                                                                                                                                                                                                                                                                                                                                                                                                                                                                                                                                                                                                    | 26,178                  | 1.01 (0.98,1.04)               | 0.60           | 1.01 (0.98,1.03)        | 0.59           | 1.02 (1.00,1.05)                 | 0.00           | 1.03 (1.00,1.05)        | 0.00           |
| <b>Specific cancer sites</b>                                                                                                                                                                                                                                                                                                                                                                                                                                                                                                                                                                                                               |                         |                                |                |                         |                |                                  |                |                         |                |
| Colorectal                                                                                                                                                                                                                                                                                                                                                                                                                                                                                                                                                                                                                                 | 6,037                   | 1.02 (0.99,1.06)               | 0.77           | 1.02 (0.99,1.06)        | 0.77           | 1.11 (0.97,1.27)                 | 0.71           | 1.11 (0.97,1.27)        | 0.71           |
| Pancreas                                                                                                                                                                                                                                                                                                                                                                                                                                                                                                                                                                                                                                   | 1,957                   | 1.00 (0.97,1.04)               | 0.37           | 1.00 (0.97,1.04)        | 0.36           | 1.08 (1.01,1.17)                 | 0.00           | 1.08 (1.00,1.16)        | 0.00           |
| Kidney                                                                                                                                                                                                                                                                                                                                                                                                                                                                                                                                                                                                                                     | 1,967                   | 1.01 (0.98,1.04)               | 0.07           | 1.01 (0.98,1.04)        | 0.06           | 1.08 (0.91,1.29)                 | 0.32           | 1.08 (0.92,1.26)        | 0.19           |
| Bladder                                                                                                                                                                                                                                                                                                                                                                                                                                                                                                                                                                                                                                    | 4,018                   | 1.01 (0.96,1.06)               | 0.79           | 1.01 (0.97,1.06)        | 0.72           | 1.04 (0.96,1.12)                 | 0.00           | 1.05 (0.98,1.13)        | 0.00           |
| Lung                                                                                                                                                                                                                                                                                                                                                                                                                                                                                                                                                                                                                                       | 8,559                   | 1.00 (0.97,1.03)               | 0.68           | 1.00 (0.97,1.04)        | 0.80           | 1.01 (0.84,1.23)                 | 0.82           | 1.02 (0.82,1.28)        | 0.90           |
| Prostate                                                                                                                                                                                                                                                                                                                                                                                                                                                                                                                                                                                                                                   | 30,006                  | 0.99 (0.97,1.01)               | 0.79           | 0.99 (0.98,1.00)        | 0.19           | 0.97 (0.92,1.02)                 | 0.49           | 0.96 (0.91,1.01)        | 0.51           |
| <b>Women</b>                                                                                                                                                                                                                                                                                                                                                                                                                                                                                                                                                                                                                               |                         |                                |                |                         |                |                                  |                |                         |                |
| †Total Cancers                                                                                                                                                                                                                                                                                                                                                                                                                                                                                                                                                                                                                             | 63,732                  | 1.01 (1.00,1.01)               | 0.84           | 1.01 (1.01,1.01)        | 0.00           | 1.04 (1.01,1.07)                 | 0.69           | 1.05 (1.02,1.07)        | 0.49           |
| OBR-cancers                                                                                                                                                                                                                                                                                                                                                                                                                                                                                                                                                                                                                                | 36,509                  | 1.01 (1.00,1.02)               | 0.84           | 1.01 (1.01,1.02)        | 0.53           | 1.06 (1.01,1.11)                 | 0.77           | 1.07 (1.01,1.13)        | 0.82           |
| NOR-cancers                                                                                                                                                                                                                                                                                                                                                                                                                                                                                                                                                                                                                                | 24,499                  | 1.00 (0.99,1.01)               | 0.78           | 1.00 (1.00,1.01)        | 0.54           | 1.00 (0.92,1.07)                 | 0.81           | 1.00 (0.93,1.08)        | 0.81           |
| NOR-cancers excluding lung                                                                                                                                                                                                                                                                                                                                                                                                                                                                                                                                                                                                                 | 16,352                  | 1.00 (0.99,1.02)               | 0.85           | 1.01 (1.00,1.02)        | 0.67           | 1.03 (0.96,1.10)                 | 0.73           | 1.03 (0.97,1.10)        | 0.61           |
| <b>Specific cancer sites</b>                                                                                                                                                                                                                                                                                                                                                                                                                                                                                                                                                                                                               |                         |                                |                |                         |                |                                  |                |                         |                |
| Colorectal                                                                                                                                                                                                                                                                                                                                                                                                                                                                                                                                                                                                                                 | 6,251                   | 1.01 (0.99,1.02)               | 0.65           | 1.01 (0.99,1.02)        | 0.64           | 1.06 (1.00,1.13)                 | 0.35           | 1.06 (1.00,1.12)        | 0.27           |
| Pancreas                                                                                                                                                                                                                                                                                                                                                                                                                                                                                                                                                                                                                                   | 2,019                   | 1.00 (0.97,1.03)               | 0.51           | 1.00 (0.97,1.03)        | 0.52           | 1.01 (0.85,1.21)                 | 0.61           | 1.02 (0.85,1.23)        | 0.62           |
| Kidney                                                                                                                                                                                                                                                                                                                                                                                                                                                                                                                                                                                                                                     | 1,270                   | 1.01 (0.99,1.03)               | 0.52           | 1.01 (0.99,1.03)        | 0.50           | 1.14 (0.91,1.42)                 | 0.78           | 1.12 (0.90,1.39)        | 0.77           |
| Lung                                                                                                                                                                                                                                                                                                                                                                                                                                                                                                                                                                                                                                       | 8,114                   | 0.99 (0.97,1.01)               | 0.61           | 0.99 (0.98,1.01)        | 0.43           | 0.94 (0.83,1.06)                 | 0.72           | 0.96 (0.85,1.07)        | 0.70           |
| Endometrial                                                                                                                                                                                                                                                                                                                                                                                                                                                                                                                                                                                                                                | 3,931                   | 1.03 (1.00,1.05)               | 0.89           | 1.03 (1.00,1.05)        | 0.89           | 1.26 (1.02,1.56)                 | 0.94           | 1.26 (1.02,1.56)        | 0.93           |
| Ovarian                                                                                                                                                                                                                                                                                                                                                                                                                                                                                                                                                                                                                                    | 2,717                   | 1.01 (1.00,1.02)               | 0.00           | 1.01 (1.00,1.02)        | 0.00           | 1.09 (1.02,1.17)                 | 0.00           | 1.10 (1.03,1.18)        | 0.00           |
| Post-menopausal breast cancer                                                                                                                                                                                                                                                                                                                                                                                                                                                                                                                                                                                                              | 17,582                  | 1.00 (0.99,1.01)               | 0.60           | 1.00 (0.99,1.02)        | 0.80           | 1.00 (0.94,1.06)                 | 0.66           | 1.02 (0.95,1.09)        | 0.73           |
| <p>*Multivariable adjusted models: baseline age, ethnicity, alcohol, smoking, HRT.<br/> † The sum of OBR and NOR cancer does not equal total cancers as non-melanoma skin cancers were excluded in the EPIC cohort analyses.<br/> Degree of overweight is the cumulative sum of the number of BMI units <math>\geq 30</math> kg/m<sup>2</sup><br/> Duration of overweight is the cumulative sum of the duration overweight (BMI <math>\geq 30</math> kg/m<sup>2</sup>).<br/> <b>Abbreviations:</b> OBR, obesity-related; NOR, non-obesity-related; CI, confidence interval; HR, hazard ratio; BMI, body mass index; MV, multivariable.</p> |                         |                                |                |                         |                |                                  |                |                         |                |

**Table S15: Comparison of Harrell's C-statistic of metrics, ABACus 2 Consortium.**

| Harrell's C-statistic(95% CI)           |                         |                         |                                                                |                                 |                                                                                           |                                                                         |                         |                         |                                                                  |
|-----------------------------------------|-------------------------|-------------------------|----------------------------------------------------------------|---------------------------------|-------------------------------------------------------------------------------------------|-------------------------------------------------------------------------|-------------------------|-------------------------|------------------------------------------------------------------|
| Characteristic                          | Obese-years             | Baseline BMI            | Difference in c-statistic between baseline BMI and obese-years | Obese - years with baseline BMI | Difference in c-statistic between obese-years with BMI combined compared with obese-years | Difference in c-statistic between obese-years with BMI combined and BMI | Degree of obesity       | Duration of obesity     | Difference in c-statistic between duration and degree of obesity |
| <b>Men</b>                              |                         |                         |                                                                |                                 |                                                                                           |                                                                         |                         |                         |                                                                  |
| Total Cancers                           | 0.600<br>(0.566, 0.634) | 0.589<br>(0.565, 0.613) | 0.000<br>(-0.006, 0.007)                                       | 0.598<br>(0.562, 0.634)         | -0.000<br>(-0.003, 0.002)                                                                 | -0.001<br>(-0.006, 0.003)                                               | 0.598<br>(0.563, 0.633) | 0.592<br>(0.564, 0.619) | -0.000<br>(-0.004, 0.003)                                        |
| OR-cancers                              | 0.608<br>(0.574, 0.640) | 0.612<br>(0.578, 0.644) | 0.001<br>(-0.003, 0.004)                                       | 0.620<br>(0.590, 0.648)         | 0.002<br>(-0.000, 0.005)                                                                  | 0.000<br>(-0.000, 0.001)                                                | 0.608<br>(0.575, 0.640) | 0.611<br>(0.579, 0.642) | -0.001<br>(-0.004, 0.003)                                        |
| NOR-cancers                             | 0.592<br>(0.566, 0.618) | 0.592<br>(0.570, 0.613) | 0.000<br>(-0.001, 0.002)                                       | 0.597<br>(0.555, 0.637)         | 0.001<br>(-0.002, 0.003)                                                                  | 0.000<br>(-0.002, 0.002)                                                | 0.605<br>(0.580, 0.629) | 0.591<br>(0.567, 0.614) | -0.001<br>(-0.003, 0.001)                                        |
| NOR-cancers excluding lung and prostate | 0.615<br>(0.546, 0.678) | 0.615<br>(0.547, 0.678) | -0.000<br>(-0.003, 0.002)                                      | 0.619<br>(0.549, 0.684)         | -0.000<br>(-0.001, 0.001)                                                                 | 0.000<br>(-0.002, 0.003)                                                | 0.615<br>(0.547, 0.678) | 0.615<br>(0.547, 0.679) | 0.000<br>(-0.001, 0.002)                                         |
| <b>Specific cancer sites</b>            |                         |                         |                                                                |                                 |                                                                                           |                                                                         |                         |                         |                                                                  |
| Colorectal                              | 0.624<br>(0.580, 0.665) | 0.623<br>(0.589, 0.656) | 0.001<br>(-0.002, 0.004)                                       | 0.637<br>(0.601, 0.672)         | 0.001<br>(-0.002, 0.005)                                                                  | 0.000<br>(-0.002, 0.002)                                                | 0.623<br>(0.577, 0.667) | 0.626<br>(0.579, 0.671) | -0.000<br>(-0.003, 0.003)                                        |
| Pancreas                                | 0.604<br>(0.547, 0.658) | 0.605<br>(0.549, 0.659) | -0.002<br>(-0.006, 0.002)                                      | 0.608<br>(0.562, 0.653)         | 0.001<br>(-0.001, 0.003)                                                                  | 0.003<br>(-0.002, 0.008)                                                | 0.604<br>(0.545, 0.659) | 0.604<br>(0.545, 0.660) | 0.000<br>(-0.003, 0.004)                                         |
| Kidney                                  | 0.579<br>(0.550, 0.607) | 0.595<br>(0.589, 0.601) | 0.008<br>(-0.003, 0.018)                                       | 0.595<br>(0.584, 0.607)         | 0.008<br>(-0.003, 0.018)                                                                  | 0.001<br>(-0.004, 0.005)                                                | 0.580<br>(0.549, 0.610) | 0.580<br>(0.557, 0.603) | 0.006<br>(-0.005, 0.018)                                         |
| Bladder                                 | 0.679<br>(0.613, 0.739) | 0.678<br>(0.611, 0.739) | 0.001<br>(-0.022, 0.025)                                       | 0.680<br>(0.613, 0.740)         | 0.003<br>(-0.007, 0.012)                                                                  | 0.002<br>(-0.015, 0.018)                                                | 0.679<br>(0.613, 0.739) | 0.677<br>(0.611, 0.736) | -0.005<br>(-0.019, 0.009)                                        |
| Lung                                    | 0.720<br>(0.694, 0.745) | 0.726<br>(0.698, 0.753) | 0.005<br>(0.000, 0.009)                                        | 0.727<br>(0.697, 0.755)         | 0.005<br>(0.001, 0.010)                                                                   | 0.001<br>(-0.001, 0.003)                                                | 0.720<br>(0.695, 0.744) | 0.720<br>(0.695, 0.744) | 0.001<br>(-0.002, 0.005)                                         |
| Prostate                                | 0.604<br>(0.590, 0.618) | 0.603<br>(0.586, 0.619) | -0.001<br>(-0.004, 0.002)                                      | 0.609<br>(0.600, 0.619)         | -0.000<br>(-0.003, 0.002)                                                                 | 0.000<br>(-0.001, 0.001)                                                | 0.604<br>(0.591, 0.618) | 0.604<br>(0.590, 0.618) | -0.001<br>(-0.005, 0.003)                                        |
| <b>Women</b>                            |                         |                         |                                                                |                                 |                                                                                           |                                                                         |                         |                         |                                                                  |
| Total Cancers                           | 0.570<br>(0.532, 0.607) | 0.578<br>(0.556, 0.601) | 0.000<br>(-0.000, 0.001)                                       | 0.579<br>(0.549, 0.607)         | 0.000<br>(-0.000, 0.001)                                                                  | 0.000<br>(-0.000, 0.000)                                                | 0.579<br>(0.558, 0.599) | 0.579<br>(0.558, 0.598) | 0.000<br>(-0.000, 0.001)                                         |
| OR-cancers                              | 0.560<br>(0.529, 0.590) | 0.572<br>(0.545, 0.598) | 0.003<br>(0.001, 0.005)                                        | 0.598<br>(0.535, 0.658)         | 0.003<br>(0.001, 0.005)                                                                   | 0.000<br>(-0.004, 0.005)                                                | 0.560<br>(0.530, 0.590) | 0.568<br>(0.541, 0.595) | 0.001<br>(0.000, 0.002)                                          |
| NOR-cancers                             | 0.639<br>(0.579, 0.695) | 0.640<br>(0.577, 0.699) | 0.002<br>(-0.001, 0.005)                                       | 0.653<br>(0.593, 0.709)         | 0.002<br>(-0.002, 0.006)                                                                  | 0.001<br>(-0.001, 0.002)                                                | 0.638<br>(0.577, 0.695) | 0.639<br>(0.578, 0.695) | 0.000<br>(-0.000, 0.001)                                         |
| NOR-cancers excluding lung              | 0.587<br>(0.538, 0.635) | 0.589<br>(0.540, 0.636) | 0.001<br>(-0.002, 0.004)                                       | 0.590<br>(0.541, 0.637)         | 0.001<br>(-0.002, 0.004)                                                                  | 0.000<br>(-0.000, 0.001)                                                | 0.588<br>(0.539, 0.635) | 0.588<br>(0.540, 0.634) | -0.001<br>(-0.002, 0.001)                                        |
| <b>Specific cancer sites</b>            |                         |                         |                                                                |                                 |                                                                                           |                                                                         |                         |                         |                                                                  |
| Colorectal                              | 0.625<br>(0.555, 0.689) | 0.629<br>(0.572, 0.683) | -0.000<br>(-0.002, 0.001)                                      | 0.629<br>(0.569, 0.684)         | -0.000<br>(-0.000, 0.000)                                                                 | 0.000<br>(-0.001, 0.001)                                                | 0.624<br>(0.555, 0.688) | 0.624<br>(0.556, 0.688) | 0.000<br>(-0.001, 0.002)                                         |
| Pancreas                                | 0.633<br>(0.582, 0.681) | 0.632<br>(0.580, 0.681) | 0.001<br>(-0.001, 0.004)                                       | 0.639<br>(0.589, 0.686)         | 0.001<br>(-0.000, 0.003)                                                                  | -0.000<br>(-0.001, 0.001)                                               | 0.633<br>(0.582, 0.681) | 0.633<br>(0.581, 0.683) | 0.000<br>(-0.002, 0.003)                                         |
| Kidney                                  | 0.619<br>(0.560, 0.674) | 0.645<br>(0.595, 0.692) | 0.011<br>(0.003, 0.019)                                        | 0.647<br>(0.594, 0.696)         | 0.011<br>(0.002, 0.019)                                                                   | -0.001<br>(-0.003, 0.001)                                               | 0.619<br>(0.561, 0.674) | 0.623<br>(0.568, 0.674) | 0.007<br>(-0.001, 0.014)                                         |
| Lung                                    | 0.744<br>(0.714, 0.772) | 0.746<br>(0.713, 0.777) | 0.002<br>(-0.002, 0.006)                                       | 0.741<br>(0.715, 0.766)         | 0.002<br>(-0.002, 0.006)                                                                  | 0.001<br>(-0.001, 0.002)                                                | 0.745<br>(0.715, 0.772) | 0.744<br>(0.712, 0.773) | 0.001<br>(-0.001, 0.002)                                         |
| Endometrial                             | 0.607<br>(0.570, 0.643) | 0.625<br>(0.580, 0.668) | 0.013<br>(0.002, 0.024)                                        | 0.618<br>(0.560, 0.673)         | 0.011<br>(0.003, 0.019)                                                                   | 0.000<br>(-0.002, 0.002)                                                | 0.607<br>(0.569, 0.643) | 0.612<br>(0.575, 0.649) | -0.003<br>(-0.015, 0.010)                                        |
| Ovarian                                 | 0.580<br>(0.536, 0.623) | 0.582<br>(0.542, 0.622) | 0.001<br>(-0.003, 0.004)                                       | 0.589<br>(0.546, 0.630)         | 0.000<br>(-0.003, 0.003)                                                                  | 0.001<br>(0.000, 0.001)                                                 | 0.580<br>(0.536, 0.623) | 0.581<br>(0.535, 0.625) | 0.001<br>(-0.002, 0.004)                                         |
| Post-menopausal breast cancer           | 0.575<br>(0.506, 0.642) | 0.581<br>(0.511, 0.647) | 0.003<br>(0.001, 0.005)                                        | 0.583<br>(0.511, 0.652)         | 0.003<br>(0.001, 0.006)                                                                   | -0.000<br>(-0.000, 0.000)                                               | 0.576<br>(0.507, 0.641) | 0.577<br>(0.508, 0.643) | 0.000<br>(-0.001, 0.001)                                         |

Key: Green – significant difference in C-statistic.  
 \*All models were multivariable adjusted, including baseline age, ethnicity, alcohol, smoking, HRT.  
**Abbreviations:** SE, standard error; OR, obesity-related; NOR, non-obesity-related; BMI, body mass index.



a) **Findings from analyses using measured and not predicted BMI from participants with at least 3 measured BMI readings**

**Analysis of overweight-years exposure**

**Table S16: Hazard ratio of cancers per standard deviation of overweight-years and BMI.**

| Outcomes                                                                                                                                                                          | Number of cancer events | Overweight-years (per SD) |                |                         |                | BMI (per SD)             |                |                         |                |
|-----------------------------------------------------------------------------------------------------------------------------------------------------------------------------------|-------------------------|---------------------------|----------------|-------------------------|----------------|--------------------------|----------------|-------------------------|----------------|
|                                                                                                                                                                                   |                         | Age-adjusted HR (95% CI)  | I <sup>2</sup> | MV-adjusted HR (95% CI) | I <sup>2</sup> | Age-adjusted HR (95% CI) | I <sup>2</sup> | MV-adjusted HR (95% CI) | I <sup>2</sup> |
| <b>Men</b>                                                                                                                                                                        |                         |                           |                |                         |                |                          |                |                         |                |
| †Total Cancers                                                                                                                                                                    | 85,341                  | 1.01 (0.97,1.05)          | 0.87           | 1.01 (0.96,1.05)        | 0.91           | 1.01 (0.99,1.03)         | 0.34           | 1.01 (0.98,1.04)        | 0.67           |
| OBR-cancers                                                                                                                                                                       | 12,959                  | 1.10 (1.05,1.15)          | 0.72           | 1.09 (1.04,1.15)        | 0.77           | 1.16 (1.16,1.16)         | 0.00           | 1.16 (1.15,1.17)        | 0.00           |
| NOR-cancers                                                                                                                                                                       | 64,743                  | 0.98 (0.93,1.03)          | 0.84           | 0.98 (0.93,1.03)        | 0.84           | 0.96 (0.93,1.00)         | 0.79           | 0.96 (0.93,1.00)        | 0.71           |
| NOR-cancers excluding lung and prostate                                                                                                                                           | 26,178                  | 1.03 (0.93,1.13)          | 0.79           | 1.03 (0.94,1.12)        | 0.76           | 1.04 (1.01,1.07)         | 0.00           | 1.03 (0.99,1.07)        | 0.02           |
| <b>Specific cancer sites</b>                                                                                                                                                      |                         |                           |                |                         |                |                          |                |                         |                |
| Colorectal                                                                                                                                                                        | 6,037                   | 1.09 (1.02,1.17)          | 0.56           | 1.10 (1.02,1.17)        | 0.57           | 1.13 (1.09,1.18)         | 0.09           | 1.13 (1.09,1.18)        | 0.19           |
| Pancreas                                                                                                                                                                          | 1,957                   | 1.05 (0.94,1.18)          | 0.44           | 1.05 (0.94,1.17)        | 0.44           | 1.07 (1.02,1.12)         | 0.00           | 1.07 (1.02,1.12)        | 0.00           |
| Kidney                                                                                                                                                                            | 1,967                   | 1.13 (1.01,1.25)          | 0.53           | 1.12 (1.01,1.24)        | 0.50           | 1.25 (1.19,1.31)         | 0.00           | 1.24 (1.18,1.3)         | 0.00           |
| Bladder                                                                                                                                                                           | 4,018                   | 1.08 (1.06,1.11)          | 0.00           | 1.08 (1.05,1.11)        | 0.00           | 1.08 (1.02,1.15)         | 0.00           | 1.07 (1.01,1.14)        | 0.00           |
| Lung                                                                                                                                                                              | 8,559                   | 0.96 (0.87,1.06)          | 0.78           | 0.96 (0.86,1.06)        | 0.79           | 0.87 (0.78,0.97)         | 0.82           | 0.85 (0.77,0.93)        | 0.82           |
| Prostate                                                                                                                                                                          | 30,006                  | 0.97 (0.91,1.03)          | 0.83           | 0.96 (0.90,1.03)        | 0.84           | 0.97 (0.91,1.04)         | 0.85           | 0.97 (0.92,1.03)        | 0.78           |
| <b>Women</b>                                                                                                                                                                      |                         |                           |                |                         |                |                          |                |                         |                |
| †Total Cancers                                                                                                                                                                    | 63,732                  | 1.03 (1.00,1.05)          | 0.58           | 1.03 (1.01,1.07)        | 0.65           | 1.05 (1.01,1.09)         | 0.84           | 1.06 (1.01,1.11)        | 0.86           |
| OBR-cancers                                                                                                                                                                       | 36,509                  | 1.06 (1.03,1.09)          | 0.50           | 1.06 (1.03,1.10)        | 0.67           | 1.11 (1.07,1.15)         | 0.74           | 1.12 (1.08,1.16)        | 0.81           |
| NOR-cancers                                                                                                                                                                       | 24,499                  | 0.96 (0.92,1.00)          | 0.61           | 0.98 (0.94,1.02)        | 0.68           | 0.91 (0.82,1.01)         | 0.91           | 0.93 (0.83,1.05)        | 0.91           |
| NOR-cancers excluding lung                                                                                                                                                        | 16,352                  | 1.01 (0.97,1.04)          | 0.27           | 1.02 (0.96,1.08)        | 0.49           | 0.99 (0.92,1.06)         | 0.69           | 1.01 (0.93,1.09)        | 0.66           |
| <b>Specific cancer sites</b>                                                                                                                                                      |                         |                           |                |                         |                |                          |                |                         |                |
| Colorectal                                                                                                                                                                        | 6,251                   | 1.08 (1.05,1.11)          | 0.00           | 1.08 (1.05,1.11)        | 0.00           | 1.09 (1.04,1.14)         | 0.39           | 1.08 (1.03,1.12)        | 0.24           |
| Pancreas                                                                                                                                                                          | 2,019                   | 1.06 (0.93,1.21)          | 0.59           | 1.06 (0.94,1.21)        | 0.54           | 1.02 (0.95,1.09)         | 0.13           | 1.02 (0.97,1.07)        | 0.00           |
| Kidney                                                                                                                                                                            | 1,270                   | 1.18 (1.14,1.21)          | 0.00           | 1.16 (1.12,1.20)        | 0.00           | 1.33 (1.18,1.49)         | 0.83           | 1.31 (1.17,1.48)        | 0.83           |
| Lung                                                                                                                                                                              | 8,114                   | 0.90 (0.85,0.95)          | 0.33           | 0.92 (0.89,0.96)        | 0.00           | 0.85 (0.78,0.92)         | 0.72           | 0.87 (0.80,0.94)        | 0.67           |
| Endometrial                                                                                                                                                                       | 3,931                   | 1.21 (1.09,1.34)          | 0.81           | 1.21 (1.11,1.32)        | 0.65           | 1.37 (1.19,1.58)         | 0.93           | 1.40 (1.18,1.67)        | 0.95           |
| Ovarian                                                                                                                                                                           | 2,717                   | 1.01 (0.91,1.12)          | 0.46           | 1.01 (0.92,1.11)        | 0.43           | 0.99 (0.88,1.11)         | 0.73           | 1.01 (0.90,1.12)        | 0.67           |
| Post-menopausal breast cancer                                                                                                                                                     | 17,582                  | 0.98 (0.96,0.99)          | 0.00           | 0.99 (0.97,1.01)        | 0.00           | 1.05 (1.01,1.10)         | 0.59           | 1.08 (1.02,1.14)        | 0.67           |
| *Multivariable adjusted models: baseline age, ethnicity, alcohol, smoking, HRT.                                                                                                   |                         |                           |                |                         |                |                          |                |                         |                |
| † The sum of OBR and NOR cancer does not equal total cancers as non-melanoma skin cancers were excluded in the EPIC cohort analyses.                                              |                         |                           |                |                         |                |                          |                |                         |                |
| <b>Abbreviations:</b> OBR, obesity-related; NOR, non-obesity-related; CI, confidence interval; HR, hazard ratio; BMI, body mass index; MV, multivariable; SD, standard deviation. |                         |                           |                |                         |                |                          |                |                         |                |

**Table S17: Hazard ratio of specific cancers per 100 overweight-years and per 5-unit baseline BMI, ABACus 2 Consortium.**

| Outcomes                                                                                                                                                                          | Number of cancer events | Overweight-years (per 100 kg-years/m <sup>2</sup> ) |                |                         |                | BMI (per 5 units)        |                |                         |                |
|-----------------------------------------------------------------------------------------------------------------------------------------------------------------------------------|-------------------------|-----------------------------------------------------|----------------|-------------------------|----------------|--------------------------|----------------|-------------------------|----------------|
|                                                                                                                                                                                   |                         | Age-adjusted HR (95% CI)                            | I <sup>2</sup> | MV-adjusted HR (95% CI) | I <sup>2</sup> | Age-adjusted HR (95% CI) | I <sup>2</sup> | MV-adjusted HR (95% CI) | I <sup>2</sup> |
| <b>Men</b>                                                                                                                                                                        |                         |                                                     |                |                         |                |                          |                |                         |                |
| †Total Cancers                                                                                                                                                                    | 85,341                  | 1.02<br>(0.95,1.09)                                 | 0.90           | 1.01<br>(0.94,1.09)     | 0.92           | 1.01<br>(0.99,1.03)      | 0.35           | 1.01<br>(0.98,1.05)     | 0.61           |
| OBR-cancers                                                                                                                                                                       | 12,959                  | 1.16<br>(1.12,1.21)                                 | 0.04           | 1.16<br>(1.10,1.22)     | 0.37           | 1.20<br>(1.18,1.22)      | 0.00           | 1.20<br>(1.19,1.21)     | 0.00           |
| NOR-cancers                                                                                                                                                                       | 64,743                  | 0.96<br>(0.90,1.04)                                 | 0.68           | 0.97<br>(0.89,1.04)     | 0.74           | 0.96<br>(0.92,1.01)      | 0.80           | 0.95<br>(0.91,0.99)     | 0.61           |
| NOR-cancers excluding lung and prostate                                                                                                                                           | 26,178                  | 1.05<br>(0.89,1.23)                                 | 0.80           | 1.04<br>(0.89,1.22)     | 0.81           | 1.05<br>(1.02,1.09)      | 0.00           | 1.04<br>(1.00,1.08)     | 0.00           |
| <b>Specific cancer sites</b>                                                                                                                                                      |                         |                                                     |                |                         |                |                          |                |                         |                |
| Colorectal                                                                                                                                                                        | 6,037                   | 1.15<br>(1.09,1.21)                                 | 0.22           | 1.15<br>(1.09,1.21)     | 0.19           | 1.17<br>(1.12,1.23)      | 0.18           | 1.17<br>(1.12,1.23)     | 0.08           |
| Pancreas                                                                                                                                                                          | 1,957                   | 1.07<br>(0.89,1.28)                                 | 0.47           | 1.07<br>(0.90,1.28)     | 0.45           | 1.09<br>(1.02,1.16)      | 0.00           | 1.09<br>(1.02,1.16)     | 0.00           |
| Kidney                                                                                                                                                                            | 1,967                   | 1.20<br>(1.05,1.36)                                 | 0.34           | 1.19<br>(1.05,1.36)     | 0.29           | 1.31<br>(1.23,1.40)      | 0.00           | 1.30<br>(1.22,1.39)     | 0.00           |
| Bladder                                                                                                                                                                           | 4,018                   | 1.11<br>(1.01,1.21)                                 | 0.17           | 1.10<br>(1.01,1.21)     | 0.14           | 1.09<br>(1.03,1.16)      | 0.00           | 1.07<br>(1.00,1.15)     | 0.00           |
| Lung                                                                                                                                                                              | 8,559                   | 0.94<br>(0.82,1.08)                                 | 0.78           | 0.94<br>(0.81,1.09)     | 0.80           | 0.84<br>(0.72,0.98)      | 0.84           | 0.81<br>(0.71,0.93)     | 0.83           |
| Prostate                                                                                                                                                                          | 30,006                  | 0.95<br>(0.87,1.04)                                 | 0.72           | 0.95<br>(0.86,1.04)     | 0.71           | 0.97<br>(0.89,1.05)      | 0.82           | 0.97<br>(0.90,1.03)     | 0.74           |
| <b>Women</b>                                                                                                                                                                      |                         |                                                     |                |                         |                |                          |                |                         |                |
| †Total Cancers                                                                                                                                                                    | 63,732                  | 1.03<br>(1.00,1.06)                                 | 0.63           | 1.04<br>(1.01,1.07)     | 0.55           | 1.04<br>(1.00,1.08)      | 0.85           | 1.05<br>(1.02,1.09)     | 0.83           |
| OBR-cancers                                                                                                                                                                       | 36,509                  | 1.06<br>(1.04,1.08)                                 | 0.12           | 1.07<br>(1.05,1.09)     | 0.15           | 1.10<br>(1.07,1.12)      | 0.74           | 1.10<br>(1.07,1.14)     | 0.82           |
| NOR-cancers                                                                                                                                                                       | 24,499                  | 0.95<br>(0.91,1.00)                                 | 0.72           | 0.97<br>(0.93,1.01)     | 0.68           | 0.92<br>(0.83,1.02)      | 0.91           | 0.94<br>(0.84,1.05)     | 0.90           |
| NOR-cancers excluding lung                                                                                                                                                        | 16,352                  | 1.01<br>(0.98,1.04)                                 | 0.27           | 1.01<br>(0.96,1.07)     | 0.43           | 0.99<br>(0.94,1.05)      | 0.67           | 1.00<br>(0.94,1.07)     | 0.62           |
| <b>Specific cancer sites</b>                                                                                                                                                      |                         |                                                     |                |                         |                |                          |                |                         |                |
| Colorectal                                                                                                                                                                        | 6,251                   | 1.08<br>(1.02,1.15)                                 | 0.48           | 1.07<br>(1.02,1.12)     | 0.30           | 1.08<br>(1.04,1.12)      | 0.33           | 1.07<br>(1.04,1.11)     | 0.10           |
| Pancreas                                                                                                                                                                          | 2,019                   | 1.07<br>(0.94,1.22)                                 | 0.63           | 1.07<br>(0.95,1.21)     | 0.57           | 1.02<br>(0.96,1.08)      | 0.16           | 1.02<br>(0.98,1.06)     | 0.00           |
| Kidney                                                                                                                                                                            | 1,270                   | 1.19<br>(1.10,1.28)                                 | 0.26           | 1.17<br>(1.09,1.25)     | 0.05           | 1.29<br>(1.15,1.44)      | 0.85           | 1.28<br>(1.14,1.43)     | 0.84           |
| Lung                                                                                                                                                                              | 8,114                   | 0.90<br>(0.80,1.00)                                 | 0.76           | 0.92<br>(0.86,0.99)     | 0.49           | 0.86<br>(0.79,0.94)      | 0.75           | 0.88<br>(0.81,0.96)     | 0.73           |
| Endometrial                                                                                                                                                                       | 3,931                   | 1.24<br>(1.07,1.43)                                 | 0.95           | 1.24<br>(1.08,1.41)     | 0.92           | 1.33<br>(1.16,1.52)      | 0.94           | 1.36<br>(1.16,1.59)     | 0.95           |
| Ovarian                                                                                                                                                                           | 2,717                   | 1.01<br>(0.91,1.13)                                 | 0.50           | 1.02<br>(0.93,1.12)     | 0.40           | 0.99<br>(0.89,1.10)      | 0.70           | 1.01<br>(0.91,1.12)     | 0.69           |
| Post-menopausal breast cancer                                                                                                                                                     | 17,582                  | 0.97<br>(0.94,1.00)                                 | 0.00           | 0.98<br>(0.95,1.01)     | 0.00           | 1.05<br>(1.00,1.10)      | 0.61           | 1.07<br>(1.01,1.13)     | 0.72           |
| *Multivariable adjusted models: baseline age, ethnicity, alcohol, smoking, HRT.                                                                                                   |                         |                                                     |                |                         |                |                          |                |                         |                |
| † The sum of OBR and NOR cancer does not equal total cancers as non-melanoma skin cancers were excluded in the EPIC cohort analyses.                                              |                         |                                                     |                |                         |                |                          |                |                         |                |
| <b>Abbreviations:</b> OBR, obesity-related; NOR, non-obesity-related; CI, confidence interval; HR, hazard ratio; BMI, body mass index; MV, multivariable; SD, standard deviation. |                         |                                                     |                |                         |                |                          |                |                         |                |

**Table S18: Hazard ratios of cancers per standard deviation overweight degree and duration.**

| Outcomes                                                                                                                                                                                                                                                                                                                                                                                                                                                                                                                                                                                                                                   | Number of cancer events | Degree of Overweight (per SD) |                |                         |                | Duration of Overweight (per SD) |                |                         |                |
|--------------------------------------------------------------------------------------------------------------------------------------------------------------------------------------------------------------------------------------------------------------------------------------------------------------------------------------------------------------------------------------------------------------------------------------------------------------------------------------------------------------------------------------------------------------------------------------------------------------------------------------------|-------------------------|-------------------------------|----------------|-------------------------|----------------|---------------------------------|----------------|-------------------------|----------------|
|                                                                                                                                                                                                                                                                                                                                                                                                                                                                                                                                                                                                                                            |                         | Age-adjusted HR (95% CI)      | I <sup>2</sup> | MV-adjusted HR (95% CI) | I <sup>2</sup> | Age-adjusted HR (95% CI)        | I <sup>2</sup> | MV-adjusted HR (95% CI) | I <sup>2</sup> |
| <b>Men</b>                                                                                                                                                                                                                                                                                                                                                                                                                                                                                                                                                                                                                                 |                         |                               |                |                         |                |                                 |                |                         |                |
| †Total Cancers                                                                                                                                                                                                                                                                                                                                                                                                                                                                                                                                                                                                                             | 85,341                  | 1.01 (0.83,1.22)              | 0.98           | 1.01 (0.84,1.2)         | 0.98           | 1.01 (0.95,1.06)                | 0.78           | 1.00 (0.95,1.05)        | 0.00           |
| OBR-cancers                                                                                                                                                                                                                                                                                                                                                                                                                                                                                                                                                                                                                                | 12,959                  | 1.08 (0.80,1.45)              | 0.94           | 1.08 (0.82,1.44)        | 0.94           | 1.01 (0.85,1.20)                | 0.85           | 0.98 (0.81,1.19)        | 0.00           |
| NOR-cancers                                                                                                                                                                                                                                                                                                                                                                                                                                                                                                                                                                                                                                | 64,743                  | 0.97 (0.83,1.13)              | 0.97           | 0.97 (0.84,1.11)        | 0.96           | 1.01 (0.97,1.04)                | 0.59           | 1.00 (0.97,1.03)        | 0.00           |
| NOR-cancers excluding lung and prostate                                                                                                                                                                                                                                                                                                                                                                                                                                                                                                                                                                                                    | 26,178                  | 0.96 (0.80,1.16)              | 0.95           | 0.97 (0.80,1.16)        | 0.95           | 1.05 (0.97,1.13)                | 0.74           | 1.03 (0.95,1.12)        | 0.00           |
| <b>Specific cancer sites</b>                                                                                                                                                                                                                                                                                                                                                                                                                                                                                                                                                                                                               |                         |                               |                |                         |                |                                 |                |                         |                |
| Colorectal                                                                                                                                                                                                                                                                                                                                                                                                                                                                                                                                                                                                                                 | 6,037                   | 1.13 (0.77,1.66)              | 0.86           | 1.13 (0.79,1.63)        | 0.85           | 1.00 (0.88,1.14)                | 0.63           | 0.95 (0.79,1.15)        | 0.00           |
| Pancreas                                                                                                                                                                                                                                                                                                                                                                                                                                                                                                                                                                                                                                   | 1,957                   | 0.90 (0.47,1.72)              | 0.91           | 0.90 (0.47,1.73)        | 0.91           | 1.10 (0.91,1.32)                | 0.57           | 1.07 (0.87,1.31)        | 0.00           |
| Kidney                                                                                                                                                                                                                                                                                                                                                                                                                                                                                                                                                                                                                                     | 1,967                   | 1.01 (0.83,1.24)              | 0.6            | 1.01 (0.83,1.23)        | 0.57           | 1.08 (0.95,1.23)                | 0.32           | 0.97 (0.78,1.21)        | 0.00           |
| Bladder                                                                                                                                                                                                                                                                                                                                                                                                                                                                                                                                                                                                                                    | 4,018                   | 1.05 (0.93,1.18)              | 0.00           | 1.05 (0.92,1.20)        | 0.05           | 0.99 (0.96,1.03)                | 0.00           | 1.01 (0.93,1.10)        | 0.00           |
| Lung                                                                                                                                                                                                                                                                                                                                                                                                                                                                                                                                                                                                                                       | 8,559                   | 1.01 (0.53,1.93)              | 0.97           | 1.04 (0.58,1.87)        | 0.97           | 0.94 (0.78,1.14)                | 0.91           | 0.92 (0.76,1.12)        | 0.00           |
| Prostate                                                                                                                                                                                                                                                                                                                                                                                                                                                                                                                                                                                                                                   | 30,006                  | 0.93 (0.91,0.96)              | 0.00           | 0.93 (0.92,0.94)        | 0.00           | 0.99 (0.97,1.01)                | 0.00           | 1.00 (0.96,1.05)        | 0.00           |
| <b>Women</b>                                                                                                                                                                                                                                                                                                                                                                                                                                                                                                                                                                                                                               |                         |                               |                |                         |                |                                 |                |                         |                |
| †Total Cancers                                                                                                                                                                                                                                                                                                                                                                                                                                                                                                                                                                                                                             | 63,732                  | 1.00 (0.93,1.07)              | 0.91           | 1.00 (0.93,1.08)        | 0.92           | 1.02 (1.00,1.05)                | 0.66           | 1.03 (1.00,1.06)        | 0.72           |
| OBR-cancers                                                                                                                                                                                                                                                                                                                                                                                                                                                                                                                                                                                                                                | 36,509                  | 1.00 (0.94,1.07)              | 0.86           | 1.01 (0.94,1.08)        | 0.87           | 1.02 (0.99,1.05)                | 0.39           | 1.02 (1.00,1.04)        | 0.00           |
| NOR-cancers                                                                                                                                                                                                                                                                                                                                                                                                                                                                                                                                                                                                                                | 24,499                  | 1.01 (0.84,1.22)              | 0.92           | 1.02 (0.86,1.22)        | 0.91           | 1.04 (0.98,1.09)                | 0.75           | 1.05 (0.98,1.12)        | 0.85           |
| NOR-cancers excluding lung                                                                                                                                                                                                                                                                                                                                                                                                                                                                                                                                                                                                                 | 16,352                  | 1.00 (0.90,1.12)              | 0.79           | 1.00 (0.90,1.12)        | 0.79           | 1.07 (1.00,1.14)                | 0.70           | 1.07 (1.00,1.15)        | 0.74           |
| <b>Specific cancer sites</b>                                                                                                                                                                                                                                                                                                                                                                                                                                                                                                                                                                                                               |                         |                               |                |                         |                |                                 |                |                         |                |
| Colorectal                                                                                                                                                                                                                                                                                                                                                                                                                                                                                                                                                                                                                                 | 6,251                   | 1.06 (0.97,1.15)              | 0.44           | 1.06 (0.99,1.14)        | 0.33           | 1.08 (0.99,1.18)                | 0.66           | 1.08 (1.00,1.18)        | 0.63           |
| Pancreas                                                                                                                                                                                                                                                                                                                                                                                                                                                                                                                                                                                                                                   | 2,019                   | 0.97 (0.66,1.43)              | 0.75           | 0.98 (0.67,1.44)        | 0.74           | 1.14 (0.99,1.31)                | 0.56           | 1.14 (0.98,1.32)        | 0.60           |
| Kidney                                                                                                                                                                                                                                                                                                                                                                                                                                                                                                                                                                                                                                     | 1,270                   | 1.03 (0.89,1.18)              | 0.50           | 1.02 (0.90,1.16)        | 0.33           | 1.16 (1.04,1.29)                | 0.09           | 1.15 (1.05,1.25)        | 0.00           |
| Lung                                                                                                                                                                                                                                                                                                                                                                                                                                                                                                                                                                                                                                       | 8,114                   | 0.96 (0.70,1.32)              | 0.92           | 0.97 (0.73,1.29)        | 0.90           | 0.99 (0.90,1.09)                | 0.76           | 1.02 (0.90,1.15)        | 0.86           |
| Endometrial                                                                                                                                                                                                                                                                                                                                                                                                                                                                                                                                                                                                                                | 3,931                   | 1.12 (1.01,1.24)              | 0.87           | 1.11 (1.01,1.23)        | 0.86           | 1.05 (0.89,1.24)                | 0.93           | 1.05 (0.90,1.22)        | 0.91           |
| Ovarian                                                                                                                                                                                                                                                                                                                                                                                                                                                                                                                                                                                                                                    | 2,717                   | 1.03 (0.82,1.29)              | 0.69           | 1.03 (0.82,1.29)        | 0.70           | 0.99 (0.94,1.04)                | 0.00           | 0.99 (0.94,1.04)        | 0.00           |
| Post-menopausal breast cancer                                                                                                                                                                                                                                                                                                                                                                                                                                                                                                                                                                                                              | 17,582                  | 0.92 (0.90,0.94)              | 0.00           | 0.93 (0.90,0.95)        | 0.00           | 0.97 (0.93,1.01)                | 0.31           | 0.98 (0.94,1.02)        | 0.29           |
| <p>*Multivariable adjusted models: baseline age, ethnicity, alcohol, smoking, HRT.<br/> † The sum of OBR and NOR cancer does not equal total cancers as non-melanoma skin cancers were excluded in the EPIC cohort analyses.<br/> Degree of overweight is the cumulative sum of the number of BMI units <math>\geq 25</math> kg/m<sup>2</sup><br/> Duration of overweight is the cumulative sum of the duration overweight (BMI <math>\geq 25</math> kg/m<sup>2</sup>).<br/> <b>Abbreviations:</b> OBR, obesity-related; NOR, non-obesity-related; CI, confidence interval; HR, hazard ratio; BMI, body mass index; MV, multivariable.</p> |                         |                               |                |                         |                |                                 |                |                         |                |

**Table S19: Comparison of the overweight degree and duration per 10 units and per 10 years respectively, ABACus 2 Consortium.**

| Outcomes                                                                                                                                                                                                                                                                                                                                                                                                                                                                                                                                                                                                                                   | Number of cancer events | Degree of Overweight (per 10 units) |                |                         |                | Duration of Overweight (per 10 years) |                |                         |                |
|--------------------------------------------------------------------------------------------------------------------------------------------------------------------------------------------------------------------------------------------------------------------------------------------------------------------------------------------------------------------------------------------------------------------------------------------------------------------------------------------------------------------------------------------------------------------------------------------------------------------------------------------|-------------------------|-------------------------------------|----------------|-------------------------|----------------|---------------------------------------|----------------|-------------------------|----------------|
|                                                                                                                                                                                                                                                                                                                                                                                                                                                                                                                                                                                                                                            |                         | Age-adjusted HR (95% CI)            | I <sup>2</sup> | MV-adjusted HR (95% CI) | I <sup>2</sup> | Age-adjusted HR (95% CI)              | I <sup>2</sup> | MV-adjusted HR (95% CI) | I <sup>2</sup> |
| <b>Men</b>                                                                                                                                                                                                                                                                                                                                                                                                                                                                                                                                                                                                                                 |                         |                                     |                |                         |                |                                       |                |                         |                |
| †Total Cancers                                                                                                                                                                                                                                                                                                                                                                                                                                                                                                                                                                                                                             | 85,341                  | 1.04 (0.84,1.29)                    | 0.98           | 1.04 (0.85,1.27)        | 0.97           | 1.00 (0.98,1.03)                      | 0.77           | 1.00 (0.98,1.03)        | 0.77           |
| OBR-cancers                                                                                                                                                                                                                                                                                                                                                                                                                                                                                                                                                                                                                                | 12,959                  | 1.14 (0.80,1.62)                    | 0.95           | 1.14 (0.81,1.62)        | 0.95           | 1.01 (0.90,1.12)                      | 0.85           | 1.01 (0.91,1.12)        | 0.84           |
| NOR-cancers                                                                                                                                                                                                                                                                                                                                                                                                                                                                                                                                                                                                                                | 64,743                  | 0.98 (0.85,1.12)                    | 0.95           | 0.98 (0.86,1.11)        | 0.95           | 1.01 (0.99,1.02)                      | 0.66           | 1.01 (0.99,1.02)        | 0.66           |
| NOR-cancers excluding lung and prostate                                                                                                                                                                                                                                                                                                                                                                                                                                                                                                                                                                                                    | 26,178                  | 0.97 (0.81,1.17)                    | 0.95           | 0.97 (0.81,1.17)        | 0.95           | 1.03 (0.98,1.08)                      | 0.75           | 1.03 (0.98,1.07)        | 0.75           |
| <b>Specific cancer sites</b>                                                                                                                                                                                                                                                                                                                                                                                                                                                                                                                                                                                                               |                         |                                     |                |                         |                |                                       |                |                         |                |
| Colorectal                                                                                                                                                                                                                                                                                                                                                                                                                                                                                                                                                                                                                                 | 6,037                   | 1.20 (0.74,1.97)                    | 0.88           | 1.21 (0.75,1.93)        | 0.87           | 1.00 (0.92,1.09)                      | 0.67           | 1.00 (0.92,1.09)        | 0.67           |
| Pancreas                                                                                                                                                                                                                                                                                                                                                                                                                                                                                                                                                                                                                                   | 1,957                   | 0.96 (0.49,1.90)                    | 0.91           | 0.95 (0.48,1.90)        | 0.91           | 1.05 (0.95,1.17)                      | 0.58           | 1.05 (0.95,1.17)        | 0.58           |
| Kidney                                                                                                                                                                                                                                                                                                                                                                                                                                                                                                                                                                                                                                     | 1,967                   | 1.03 (0.82,1.28)                    | 0.69           | 1.02 (0.82,1.27)        | 0.67           | 1.04 (0.97,1.13)                      | 0.35           | 1.05 (0.99,1.11)        | 0.23           |
| Bladder                                                                                                                                                                                                                                                                                                                                                                                                                                                                                                                                                                                                                                    | 4,018                   | 1.04 (0.90,1.20)                    | 0.12           | 1.06 (0.90,1.25)        | 0.35           | 1.00 (0.98,1.02)                      | 0.00           | 1.00 (0.98,1.02)        | 0.00           |
| Lung                                                                                                                                                                                                                                                                                                                                                                                                                                                                                                                                                                                                                                       | 8,559                   | 1.12 (0.56,2.22)                    | 0.97           | 1.14 (0.60,2.15)        | 0.97           | 0.97 (0.86,1.08)                      | 0.91           | 0.97 (0.85,1.10)        | 0.92           |
| Prostate                                                                                                                                                                                                                                                                                                                                                                                                                                                                                                                                                                                                                                   | 30,006                  | 0.93 (0.91,0.94)                    | 0.00           | 0.93 (0.90,0.95)        | 0.00           | 1.00 (0.99,1.01)                      | 0.00           | 0.99 (0.97,1.02)        | 0.48           |
| <b>Women</b>                                                                                                                                                                                                                                                                                                                                                                                                                                                                                                                                                                                                                               |                         |                                     |                |                         |                |                                       |                |                         |                |
| †Total Cancers                                                                                                                                                                                                                                                                                                                                                                                                                                                                                                                                                                                                                             | 63,732                  | 1.01 (0.94,1.07)                    | 0.92           | 1.01 (0.94,1.08)        | 0.93           | 1.01 (1.00,1.03)                      | 0.65           | 1.02 (1.00,1.04)        | 0.78           |
| OBR-cancers                                                                                                                                                                                                                                                                                                                                                                                                                                                                                                                                                                                                                                | 36,509                  | 1.01 (0.95,1.06)                    | 0.87           | 1.01 (0.95,1.07)        | 0.88           | 1.01 (1.00,1.03)                      | 0.38           | 1.01 (1.00,1.02)        | 0.04           |
| NOR-cancers                                                                                                                                                                                                                                                                                                                                                                                                                                                                                                                                                                                                                                | 24,499                  | 1.04 (0.82,1.33)                    | 0.93           | 1.04 (0.83,1.30)        | 0.91           | 1.02 (0.99,1.06)                      | 0.77           | 1.03 (0.99,1.07)        | 0.85           |
| NOR-cancers excluding lung                                                                                                                                                                                                                                                                                                                                                                                                                                                                                                                                                                                                                 | 16,352                  | 1.00 (0.91,1.11)                    | 0.81           | 1.01 (0.91,1.11)        | 0.81           | 1.04 (1.01,1.08)                      | 0.65           | 1.04 (1.00,1.09)        | 0.71           |
| Colorectal                                                                                                                                                                                                                                                                                                                                                                                                                                                                                                                                                                                                                                 | 6,251                   | 1.05 (0.94,1.16)                    | 0.60           | 1.04 (0.95,1.15)        | 0.54           | 1.05 (1.00,1.11)                      | 0.68           | 1.05 (1.00,1.10)        | 0.64           |
| Pancreas                                                                                                                                                                                                                                                                                                                                                                                                                                                                                                                                                                                                                                   | 2,019                   | 0.98 (0.71,1.37)                    | 0.74           | 0.99 (0.71,1.39)        | 0.75           | 1.08 (0.99,1.17)                      | 0.59           | 1.08 (0.98,1.18)        | 0.63           |
| Kidney                                                                                                                                                                                                                                                                                                                                                                                                                                                                                                                                                                                                                                     | 1,270                   | 1.03 (0.90,1.18)                    | 0.54           | 1.02 (0.90,1.16)        | 0.43           | 1.09 (1.01,1.17)                      | 0.25           | 1.09 (1.02,1.15)        | 0.01           |
| Lung                                                                                                                                                                                                                                                                                                                                                                                                                                                                                                                                                                                                                                       | 8,114                   | 1.01 (0.7,1.46)                     | 0.91           | 1.02 (0.73,1.43)        | 0.89           | 0.99 (0.94,1.06)                      | 0.77           | 1.01 (0.94,1.09)        | 0.86           |
| Endometrial                                                                                                                                                                                                                                                                                                                                                                                                                                                                                                                                                                                                                                | 3,931                   | 1.12 (0.98,1.28)                    | 0.92           | 1.11 (0.98,1.26)        | 0.91           | 1.03 (0.93,1.14)                      | 0.93           | 1.03 (0.94,1.13)        | 0.92           |
| Ovarian                                                                                                                                                                                                                                                                                                                                                                                                                                                                                                                                                                                                                                    | 2,717                   | 1.04 (0.83,1.31)                    | 0.71           | 1.05 (0.83,1.32)        | 0.72           | 0.99 (0.96,1.02)                      | 0.00           | 0.99 (0.96,1.03)        | 0.00           |
| Post-menopausal breast cancer                                                                                                                                                                                                                                                                                                                                                                                                                                                                                                                                                                                                              | 17,582                  | 0.92 (0.90,0.95)                    | 0.00           | 0.93 (0.90,0.96)        | 0.00           | 0.98 (0.96,1.00)                      | 0.25           | 0.99 (0.96,1.01)        | 0.43           |
| <p>*Multivariable adjusted models: baseline age, ethnicity, alcohol, smoking, HRT.<br/> † The sum of OBR and NOR cancer does not equal total cancers as non-melanoma skin cancers were excluded in the EPIC cohort analyses.<br/> Degree of overweight is the cumulative sum of the number of BMI units <math>\geq 25</math> kg/m<sup>2</sup><br/> Duration of overweight is the cumulative sum of the duration overweight (BMI <math>\geq 25</math> kg/m<sup>2</sup>).<br/> <b>Abbreviations:</b> OBR, obesity-related; NOR, non-obesity-related; CI, confidence interval; HR, hazard ratio; BMI, body mass index; MV, multivariable.</p> |                         |                                     |                |                         |                |                                       |                |                         |                |

**Table S20: Comparison of Harrell’s C-statistic of metrics, ABACus 2 Consortium.**

| Harrell’s C-statistic(95% CI)                  |                      |                      |                                                            |                           |                                                                                                     |                                                                              |                      |                        |                                                                     |
|------------------------------------------------|----------------------|----------------------|------------------------------------------------------------|---------------------------|-----------------------------------------------------------------------------------------------------|------------------------------------------------------------------------------|----------------------|------------------------|---------------------------------------------------------------------|
| Characteristic                                 | Overweight-years     | BMI                  | Difference in c-statistic between BMI and overweight-years | Overweight-years with BMI | Difference in c-statistic between overweight-years with BMI combined compared with overweight-years | Difference in c-statistic between overweight-years with BMI combined and BMI | Degree of overweight | Duration of overweight | Difference in c-statistic between duration and degree of overweight |
| <b>Men</b>                                     |                      |                      |                                                            |                           |                                                                                                     |                                                                              |                      |                        |                                                                     |
| <b>Total Cancers</b>                           | 0.601 (0.571, 0.629) | 0.600 (0.571, 0.629) | -0.000 (-0.001, 0.000)                                     | 0.606 (0.574, 0.637)      | 0.000 (-0.000, 0.000)                                                                               | 0.000 (-0.000, 0.001)                                                        | 0.601 (0.570, 0.630) | 0.600 (0.570, 0.630)   | -0.000 (-0.001, 0.000)                                              |
| <b>OR-cancers</b>                              | 0.607 (0.573, 0.640) | 0.612 (0.579, 0.643) | 0.005 (0.001, 0.008)                                       | 0.613 (0.579, 0.645)      | 0.005 (0.001, 0.009)                                                                                | 0.001 (-0.000, 0.002)                                                        | 0.610 (0.574, 0.646) | 0.608 (0.574, 0.641)   | 0.000 (-0.007, 0.008)                                               |
| <b>NOR-cancers</b>                             | 0.601 (0.569, 0.632) | 0.601 (0.568, 0.634) | 0.001 (-0.000, 0.001)                                      | 0.602 (0.567, 0.635)      | 0.000 (-0.000, 0.001)                                                                               | 0.000 (-0.000, 0.001)                                                        | 0.601 (0.568, 0.633) | 0.601 (0.567, 0.634)   | 0.000 (-0.000, 0.001)                                               |
| <b>NOR-cancers excluding lung and prostate</b> | 0.611 (0.539, 0.678) | 0.610 (0.537, 0.677) | -0.001 (-0.004, 0.001)                                     | 0.615 (0.548, 0.678)      | 0.000 (-0.002, 0.002)                                                                               | 0.001 (-0.001, 0.003)                                                        | 0.611 (0.541, 0.677) | 0.611 (0.540, 0.677)   | 0.001 (-0.001, 0.004)                                               |
| <b>Specific cancer sites</b>                   |                      |                      |                                                            |                           |                                                                                                     |                                                                              |                      |                        |                                                                     |
| <b>Colorectal</b>                              | 0.624 (0.584, 0.662) | 0.624 (0.586, 0.662) | 0.002 (-0.002, 0.006)                                      | 0.630 (0.593, 0.666)      | 0.003 (0.000, 0.006)                                                                                | 0.001 (-0.001, 0.002)                                                        | 0.628 (0.584, 0.670) | 0.622 (0.586, 0.656)   | -0.002 (-0.004, 0.001)                                              |
| <b>Pancreas</b>                                | 0.609 (0.569, 0.647) | 0.610 (0.566, 0.651) | 0.001 (-0.002, 0.003)                                      | 0.611 (0.564, 0.657)      | 0.002 (-0.000, 0.005)                                                                               | 0.005 (-0.003, 0.013)                                                        | 0.614 (0.566, 0.660) | 0.612 (0.577, 0.646)   | 0.003 (-0.004, 0.011)                                               |
| <b>Kidney</b>                                  | 0.591 (0.563, 0.618) | 0.603 (0.584, 0.622) | 0.007 (-0.004, 0.019)                                      | 0.603 (0.584, 0.622)      | 0.006 (-0.002, 0.015)                                                                               | 0.001 (-0.002, 0.005)                                                        | 0.598 (0.561, 0.634) | 0.599 (0.580, 0.619)   | 0.003 (-0.007, 0.014)                                               |
| <b>Bladder</b>                                 | 0.702 (0.638, 0.759) | 0.700 (0.634, 0.759) | -0.002 (-0.027, 0.023)                                     | 0.706 (0.640, 0.764)      | 0.004 (-0.013, 0.021)                                                                               | 0.006 (-0.012, 0.023)                                                        | 0.703 (0.638, 0.762) | 0.694 (0.628, 0.753)   | -0.009 (-0.030, 0.011)                                              |
| <b>Lung</b>                                    | 0.722 (0.694, 0.748) | 0.726 (0.697, 0.754) | 0.003 (-0.001, 0.008)                                      | 0.727 (0.698, 0.754)      | 0.004 (0.001, 0.008)                                                                                | 0.001 (-0.000, 0.002)                                                        | 0.727 (0.691, 0.761) | 0.727 (0.701, 0.751)   | -0.000 (-0.012, 0.012)                                              |
| <b>Prostate</b>                                | 0.599 (0.571, 0.627) | 0.599 (0.571, 0.626) | -0.000 (-0.000, 0.000)                                     | 0.600 (0.573, 0.626)      | -0.000 (-0.000, 0.000)                                                                              | -0.000 (-0.000, 0.000)                                                       | 0.600 (0.572, 0.627) | 0.599 (0.571, 0.627)   | -0.000 (-0.001, 0.001)                                              |
| <b>Women</b>                                   |                      |                      |                                                            |                           |                                                                                                     |                                                                              |                      |                        |                                                                     |
| <b>Total Cancers</b>                           | 0.584 (0.551, 0.616) | 0.585 (0.554, 0.617) | 0.001 (-0.000, 0.001)                                      | 0.588 (0.556, 0.619)      | 0.001 (-0.000, 0.001)                                                                               | 0.000 (-0.000, 0.000)                                                        | 0.585 (0.552, 0.617) | 0.586 (0.554, 0.617)   | -0.000 (-0.001, 0.001)                                              |
| <b>OR-cancers</b>                              | 0.560 (0.528, 0.592) | 0.569 (0.542, 0.596) | 0.007 (-0.000, 0.014)                                      | 0.577 (0.554, 0.599)      | 0.007 (0.001, 0.013)                                                                                | 0.000 (-0.000, 0.000)                                                        | 0.567 (0.537, 0.596) | 0.567 (0.538, 0.595)   | -0.000 (-0.002, 0.001)                                              |
| <b>NOR-cancers</b>                             | 0.641 (0.581, 0.696) | 0.641 (0.580, 0.699) | 0.001 (-0.002, 0.004)                                      | 0.642 (0.579, 0.701)      | 0.002 (0.000, 0.004)                                                                                | 0.000 (-0.000, 0.001)                                                        | 0.641 (0.580, 0.697) | 0.641 (0.581, 0.697)   | 0.001 (0.000, 0.002)                                                |
| <b>NOR-cancers excluding lung</b>              | 0.589 (0.543, 0.634) | 0.590 (0.543, 0.635) | 0.000 (-0.002, 0.003)                                      | 0.599 (0.555, 0.641)      | 0.002 (-0.001, 0.004)                                                                               | 0.000 (-0.000, 0.000)                                                        | 0.589 (0.542, 0.635) | 0.592 (0.545, 0.636)   | 0.002 (-0.003, 0.006)                                               |
| <b>Specific cancer sites</b>                   |                      |                      |                                                            |                           |                                                                                                     |                                                                              |                      |                        |                                                                     |
| <b>Colorectal</b>                              | 0.623 (0.570, 0.672) | 0.630 (0.593, 0.665) | -0.000 (-0.002, 0.002)                                     | 0.627 (0.587, 0.666)      | -0.000 (-0.001, 0.001)                                                                              | -0.000 (-0.000, 0.000)                                                       | 0.628 (0.588, 0.667) | 0.630 (0.592, 0.667)   | -0.000 (-0.001, 0.001)                                              |
| <b>Pancreas</b>                                | 0.634 (0.583, 0.683) | 0.634 (0.582, 0.683) | 0.001 (-0.001, 0.003)                                      | 0.638 (0.584, 0.688)      | 0.000 (-0.001, 0.002)                                                                               | -0.000 (-0.002, 0.002)                                                       | 0.637 (0.586, 0.685) | 0.633 (0.584, 0.679)   | -0.001 (-0.005, 0.004)                                              |
| <b>Kidney</b>                                  | 0.603 (0.583, 0.623) | 0.626 (0.606, 0.646) | 0.019 (0.005, 0.032)                                       | 0.628 (0.606, 0.650)      | 0.018 (0.004, 0.032)                                                                                | -0.001 (-0.003, 0.001)                                                       | 0.608 (0.584, 0.632) | 0.621 (0.606, 0.636)   | 0.011 (-0.001, 0.024)                                               |
| <b>Lung</b>                                    | 0.745 (0.713, 0.774) | 0.747 (0.715, 0.776) | 0.002 (-0.001, 0.006)                                      | 0.750 (0.725, 0.773)      | 0.002 (-0.001, 0.005)                                                                               | 0.000 (-0.000, 0.001)                                                        | 0.746 (0.712, 0.778) | 0.745 (0.716, 0.772)   | -0.000 (-0.003, 0.003)                                              |
| <b>Endometrial</b>                             | 0.600 (0.564, 0.634) | 0.627 (0.582, 0.669) | 0.027 (0.006, 0.047)                                       | 0.628 (0.582, 0.671)      | 0.024 (0.007, 0.041)                                                                                | -0.000 (-0.000, 0.000)                                                       | 0.624 (0.569, 0.676) | 0.614 (0.563, 0.662)   | -0.008 (-0.016, 0.000)                                              |
| <b>Ovarian</b>                                 | 0.586 (0.544, 0.626) | 0.585 (0.545, 0.623) | 0.000 (-0.004, 0.005)                                      | 0.587 (0.546, 0.627)      | 0.001 (-0.005, 0.006)                                                                               | -0.001 (-0.003, 0.002)                                                       | 0.586 (0.543, 0.627) | 0.588 (0.549, 0.626)   | 0.001 (-0.005, 0.008)                                               |
| <b>Post-menopausal breast cancer</b>           | 0.623 (0.570, 0.672) | 0.630 (0.593, 0.665) | 0.004 (0.002, 0.007)                                       | 0.627 (0.587, 0.666)      | 0.004 (0.002, 0.007)                                                                                | 0.000 (-0.001, 0.001)                                                        | 0.628 (0.588, 0.667) | 0.630 (0.592, 0.667)   | -0.000 (-0.001, 0.001)                                              |

Key: Green – significant difference in C-statistic.

\*All models were multivariable adjusted, including baseline age, ethnicity, alcohol, smoking, HRT.

Abbreviations: SE, standard error; OR, obesity-related;; NOR, non-obesity-related; BMI, body mass index.

a) Analysis of obese-years exposure

Table S21: Hazard ratio of cancers per standard deviation of obese-years and BMI, ABACus 2 Consortium.

| Outcomes                                                                                                                                                                          | Number of cancer events | Obese-years (per SD)     |                |                         |                | BMI (per SD)             |                |                         |                |
|-----------------------------------------------------------------------------------------------------------------------------------------------------------------------------------|-------------------------|--------------------------|----------------|-------------------------|----------------|--------------------------|----------------|-------------------------|----------------|
|                                                                                                                                                                                   |                         | Age-adjusted HR (95% CI) | I <sup>2</sup> | MV-adjusted HR (95% CI) | I <sup>2</sup> | Age-adjusted HR (95% CI) | I <sup>2</sup> | MV-adjusted HR (95% CI) | I <sup>2</sup> |
| <b>Men</b>                                                                                                                                                                        |                         |                          |                |                         |                |                          |                |                         |                |
| †Total Cancers                                                                                                                                                                    | 85,341                  | 1.00 (0.98,1.03)         | 0.8            | 1.00 (0.98,1.03)        | 0.79           | 1.01 (0.99,1.03)         | 0.34           | 1.01 (0.98,1.04)        | 0.67           |
| OBR-cancers                                                                                                                                                                       | 12,959                  | 1.06 (1.03,1.09)         | 0.64           | 1.06 (1.03,1.09)        | 0.64           | 1.16 (1.16,1.16)         | 0.00           | 1.16 (1.15,1.17)        | 0.00           |
| NOR-cancers                                                                                                                                                                       | 64,743                  | 0.98 (0.94,1.03)         | 0.85           | 0.98 (0.93,1.03)        | 0.88           | 0.96 (0.93,1.00)         | 0.79           | 0.96 (0.93,1.00)        | 0.71           |
| NOR-cancers excluding lung and prostate                                                                                                                                           | 26,178                  | 1.02 (0.97,1.07)         | 0.68           | 1.01 (0.97,1.06)        | 0.54           | 1.04 (1.01,1.07)         | 0.00           | 1.03 (0.99,1.07)        | 0.02           |
| <b>Specific cancer sites</b>                                                                                                                                                      |                         |                          |                |                         |                |                          |                |                         |                |
| Colorectal                                                                                                                                                                        | 6,037                   | 1.06 (1.03,1.10)         | 0.36           | 1.07 (1.03,1.11)        | 0.44           | 1.13 (1.09,1.18)         | 0.09           | 1.13 (1.09,1.18)        | 0.19           |
| Pancreas                                                                                                                                                                          | 1,957                   | 1.04 (1.00,1.07)         | 0.00           | 1.04 (1.00,1.08)        | 0.00           | 1.07 (1.02,1.12)         | 0.00           | 1.07 (1.02,1.12)        | 0.00           |
| Kidney                                                                                                                                                                            | 1,967                   | 1.07 (1.02,1.13)         | 0.08           | 1.07 (1.03,1.12)        | 0.00           | 1.25 (1.19,1.31)         | 0.00           | 1.24 (1.18,1.3)         | 0.00           |
| Bladder                                                                                                                                                                           | 4,018                   | 1.05 (1.00,1.09)         | 0.00           | 1.05 (1.00,1.10)        | 0.07           | 1.08 (1.02,1.15)         | 0.00           | 1.07 (1.01,1.14)        | 0.00           |
| Lung                                                                                                                                                                              | 8,559                   | 0.98 (0.9,1.06)          | 0.69           | 0.98 (0.90,1.07)        | 0.71           | 0.87 (0.78,0.97)         | 0.82           | 0.85 (0.77,0.93)        | 0.82           |
| Prostate                                                                                                                                                                          | 30,006                  | 0.96 (0.92,1.00)         | 0.48           | 0.96 (0.92,0.99)        | 0.43           | 0.97 (0.91,1.04)         | 0.85           | 0.97 (0.92,1.03)        | 0.78           |
| <b>Women</b>                                                                                                                                                                      |                         |                          |                |                         |                |                          |                |                         |                |
| †Total Cancers                                                                                                                                                                    | 63,732                  | 1.02 (1.00,1.04)         | 0.58           | 1.03 (1.01,1.04)        | 0.24           | 1.05 (1.01,1.09)         | 0.84           | 1.06 (1.01,1.11)        | 0.86           |
| OBR-cancers                                                                                                                                                                       | 36,509                  | 1.04 (1.02,1.07)         | 0.6            | 1.05 (1.00,1.09)        | 0.69           | 1.11 (1.07,1.15)         | 0.74           | 1.12 (1.08,1.16)        | 0.81           |
| NOR-cancers                                                                                                                                                                       | 24,499                  | 0.97 (0.94,0.99)         | 0.00           | 0.98 (0.96,1.01)        | 0.31           | 0.91 (0.82,1.01)         | 0.91           | 0.93 (0.83,1.05)        | 0.91           |
| NOR-cancers excluding lung                                                                                                                                                        | 16,352                  | 1.00 (0.99,1.02)         | 0.00           | 1.02 (1.00,1.04)        | 0.00           | 0.99 (0.92,1.06)         | 0.69           | 1.01 (0.93,1.09)        | 0.66           |
| <b>Specific cancer sites</b>                                                                                                                                                      |                         |                          |                |                         |                |                          |                |                         |                |
| Colorectal                                                                                                                                                                        | 6,251                   | 1.06 (1.03,1.10)         | 0.00           | 1.06 (1.03,1.09)        | 0.00           | 1.09 (1.04,1.14)         | 0.39           | 1.08 (1.03,1.12)        | 0.24           |
| Pancreas                                                                                                                                                                          | 2,019                   | 1.03 (0.88,1.20)         | 0.64           | 1.03 (0.88,1.19)        | 0.61           | 1.02 (0.95,1.09)         | 0.13           | 1.02 (0.97,1.07)        | 0.00           |
| Kidney                                                                                                                                                                            | 1,270                   | 1.12 (1.11,1.13)         | 0.00           | 1.11 (1.10,1.12)        | 0.00           | 1.33 (1.18,1.49)         | 0.83           | 1.31 (1.17,1.48)        | 0.83           |
| Lung                                                                                                                                                                              | 8,114                   | 0.91 (0.89,0.93)         | 0.00           | 0.93 (0.91,0.95)        | 0.00           | 0.85 (0.78,0.92)         | 0.72           | 0.87 (0.80,0.94)        | 0.67           |
| Endometrial                                                                                                                                                                       | 3,931                   | 1.18 (1.01,1.38)         | 0.8            | 1.18 (1.00,1.39)        | 0.75           | 1.37 (1.19,1.58)         | 0.93           | 1.40 (1.18,1.67)        | 0.95           |
| Ovarian                                                                                                                                                                           | 2,717                   | 1.00 (0.91,1.10)         | 0.53           | 1.01 (0.93,1.10)        | 0.5            | 0.99 (0.88,1.11)         | 0.73           | 1.01 (0.90,1.12)        | 0.67           |
| Post-menopausal breast cancer                                                                                                                                                     | 17,582                  | 0.97 (0.95,1.00)         | 0.11           | 0.98 (0.96,1.01)        | 0.16           | 1.05 (1.01,1.10)         | 0.59           | 1.08 (1.02,1.14)        | 0.67           |
| *Multivariable adjusted models: baseline age, ethnicity, alcohol, smoking, HRT.                                                                                                   |                         |                          |                |                         |                |                          |                |                         |                |
| † The sum of OBR and NOR cancer does not equal total cancers as non-melanoma skin cancers were excluded in the EPIC cohort analyses.                                              |                         |                          |                |                         |                |                          |                |                         |                |
| <b>Abbreviations:</b> OBR, obesity-related; NOR, non-obesity-related; CI, confidence interval; HR, hazard ratio; BMI, body mass index; MV, multivariable; SD, standard deviation. |                         |                          |                |                         |                |                          |                |                         |                |

**Table S22: Hazard ratio of cancers per standard deviation 100 obese-years and 5-unit BMI, ABACus 2 Consortium.**

| Outcomes                                                                                                                                                                          | Number of cancer events | Obese-years (per 100 kg-years/m <sup>2</sup> ) |                |                         |                | BMI (per 5 units)        |                |                         |                |
|-----------------------------------------------------------------------------------------------------------------------------------------------------------------------------------|-------------------------|------------------------------------------------|----------------|-------------------------|----------------|--------------------------|----------------|-------------------------|----------------|
|                                                                                                                                                                                   |                         | Age-adjusted HR (95% CI)                       | I <sup>2</sup> | MV-adjusted HR (95% CI) | I <sup>2</sup> | Age-adjusted HR (95% CI) | I <sup>2</sup> | MV-adjusted HR (95% CI) | I <sup>2</sup> |
| <b>Men</b>                                                                                                                                                                        |                         |                                                |                |                         |                |                          |                |                         |                |
| †Total Cancers                                                                                                                                                                    | 85,341                  | 1.03 (0.90,1.18)                               | 0.85           | 1.03 (0.90,1.18)        | 0.86           | 1.01 (0.99,1.03)         | 0.35           | 1.01 (0.98,1.05)        | 0.61           |
| OBR-cancers                                                                                                                                                                       | 12,959                  | 1.28 (1.23,1.32)                               | 0.00           | 1.28 (1.22,1.34)        | 0.00           | 1.20 (1.18,1.22)         | 0.00           | 1.20 (1.19,1.21)        | 0.00           |
| NOR-cancers                                                                                                                                                                       | 64,743                  | 0.94 (0.79,1.12)                               | 0.78           | 0.94 (0.78,1.12)        | 0.78           | 0.96 (0.92,1.01)         | 0.80           | 0.95 (0.91,0.99)        | 0.61           |
| NOR-cancers excluding lung and prostate                                                                                                                                           | 26,178                  | 1.07 (0.86,1.34)                               | 0.71           | 1.07 (0.86,1.33)        | 0.71           | 1.05 (1.02,1.09)         | 0.00           | 1.04 (1.00,1.08)        | 0.00           |
| <b>Specific cancer sites</b>                                                                                                                                                      |                         |                                                |                |                         |                |                          |                |                         |                |
| Colorectal                                                                                                                                                                        | 6,037                   | 1.27 (1.20,1.34)                               | 0.00           | 1.27 (1.21,1.33)        | 0.00           | 1.17 (1.12,1.23)         | 0.18           | 1.17 (1.12,1.23)        | 0.08           |
| Pancreas                                                                                                                                                                          | 1,957                   | 1.13 (0.96,1.34)                               | 0.00           | 1.13 (0.96,1.33)        | 0.00           | 1.09 (1.02,1.16)         | 0.00           | 1.09 (1.02,1.16)        | 0.00           |
| Kidney                                                                                                                                                                            | 1,967                   | 1.31 (1.14,1.52)                               | 0.00           | 1.30 (1.14,1.48)        | 0.00           | 1.31 (1.23,1.4)          | 0.00           | 1.30 (1.22,1.39)        | 0.00           |
| Bladder                                                                                                                                                                           | 4,018                   | 1.17 (0.90,1.50)                               | 0.52           | 1.16 (0.90,1.51)        | 0.51           | 1.09 (1.03,1.16)         | 0.00           | 1.07 (1.00,1.15)        | 0.00           |
| Lung                                                                                                                                                                              | 8,559                   | 0.94 (0.70,1.26)                               | 0.64           | 0.94 (0.69,1.27)        | 0.68           | 0.84 (0.72,0.98)         | 0.84           | 0.81 (0.71,0.93)        | 0.83           |
| Prostate                                                                                                                                                                          | 30,006                  | 0.85 (0.79,0.92)                               | 0.14           | 0.84 (0.78,0.91)        | 0.07           | 0.97 (0.89,1.05)         | 0.82           | 0.97 (0.9,1.03)         | 0.74           |
| <b>Women</b>                                                                                                                                                                      |                         |                                                |                |                         |                |                          |                |                         |                |
| †Total Cancers                                                                                                                                                                    | 63,732                  | 1.04 (1.00,1.09)                               | 0.61           | 1.05 (1.02,1.09)        | 0.48           | 1.04 (1.00,1.08)         | 0.85           | 1.05 (1.02,1.09)        | 0.83           |
| OBR-cancers                                                                                                                                                                       | 36,509                  | 1.09 (1.03,1.14)                               | 0.55           | 1.09 (1.05,1.14)        | 0.41           | 1.10 (1.07,1.12)         | 0.74           | 1.10 (1.07,1.14)        | 0.82           |
| NOR-cancers                                                                                                                                                                       | 24,499                  | 0.94 (0.89,1.00)                               | 0.35           | 0.97 (0.92,1.03)        | 0.31           | 0.92 (0.83,1.02)         | 0.91           | 0.94 (0.84,1.05)        | 0.90           |
| NOR-cancers excluding lung                                                                                                                                                        | 16,352                  | 1.00 (0.97,1.03)                               | 0.00           | 1.04 (1.00,1.07)        | 0.00           | 0.99 (0.94,1.05)         | 0.67           | 1.00 (0.94,1.07)        | 0.62           |
| <b>Specific cancer sites</b>                                                                                                                                                      |                         |                                                |                |                         |                |                          |                |                         |                |
| Colorectal                                                                                                                                                                        | 6,251                   | 1.10 (0.99,1.23)                               | 0.61           | 1.10 (1.00,1.21)        | 0.50           | 1.08 (1.04,1.12)         | 0.33           | 1.07 (1.04,1.11)        | 0.10           |
| Pancreas                                                                                                                                                                          | 2,019                   | 1.05 (0.85,1.31)                               | 0.62           | 1.05 (0.85,1.30)        | 0.59           | 1.02 (0.96,1.08)         | 0.16           | 1.02 (0.98,1.06)        | 0.00           |
| Kidney                                                                                                                                                                            | 1,270                   | 1.23 (1.11,1.35)                               | 0.02           | 1.20 (1.10,1.31)        | 0.00           | 1.29 (1.15,1.44)         | 0.85           | 1.28 (1.14,1.43)        | 0.84           |
| Lung                                                                                                                                                                              | 8,114                   | 0.85 (0.75,0.96)                               | 0.44           | 0.89 (0.82,0.98)        | 0.08           | 0.86 (0.79,0.94)         | 0.75           | 0.88 (0.81,0.96)        | 0.73           |
| Endometrial                                                                                                                                                                       | 3,931                   | 1.32 (1.09,1.61)                               | 0.93           | 1.33 (1.11,1.58)        | 0.90           | 1.33 (1.16,1.52)         | 0.94           | 1.36 (1.16,1.59)        | 0.95           |
| Ovarian                                                                                                                                                                           | 2,717                   | 1.05 (0.88,1.26)                               | 0.54           | 1.06 (0.90,1.25)        | 0.46           | 0.99 (0.89,1.10)         | 0.70           | 1.01 (0.91,1.12)        | 0.69           |
| Post-menopausal breast cancer                                                                                                                                                     | 17,582                  | 0.96 (0.89,1.03)                               | 0.30           | 0.97 (0.90,1.05)        | 0.33           | 1.05 (1.00,1.10)         | 0.61           | 1.07 (1.01,1.13)        | 0.72           |
| *Multivariable adjusted models: baseline age, ethnicity, alcohol, smoking, HRT.                                                                                                   |                         |                                                |                |                         |                |                          |                |                         |                |
| † The sum of OBR and NOR cancer does not equal total cancers as non-melanoma skin cancers were excluded in the EPIC cohort analyses.                                              |                         |                                                |                |                         |                |                          |                |                         |                |
| <b>Abbreviations:</b> OBR, obesity-related; NOR, non-obesity-related; CI, confidence interval; HR, hazard ratio; BMI, body mass index; MV, multivariable; SD, standard deviation. |                         |                                                |                |                         |                |                          |                |                         |                |

**Table S23: Comparison of the obesity degree and duration per unit standard deviation, ABACus 2 Consortium.**

| Outcomes                                                                                                                                                                                                                                                                                                                                                                                                                                                                                                                                                                                                                                                          | Number of cancer events | Degree of Obese (per SD) |                |                         |                | Duration of Obese (per SD) |                |                         |                |
|-------------------------------------------------------------------------------------------------------------------------------------------------------------------------------------------------------------------------------------------------------------------------------------------------------------------------------------------------------------------------------------------------------------------------------------------------------------------------------------------------------------------------------------------------------------------------------------------------------------------------------------------------------------------|-------------------------|--------------------------|----------------|-------------------------|----------------|----------------------------|----------------|-------------------------|----------------|
|                                                                                                                                                                                                                                                                                                                                                                                                                                                                                                                                                                                                                                                                   |                         | Age-adjusted HR (95% CI) | I <sup>2</sup> | MV-adjusted HR (95% CI) | I <sup>2</sup> | Age-adjusted HR (95% CI)   | I <sup>2</sup> | MV-adjusted HR (95% CI) | I <sup>2</sup> |
| <b>Men</b>                                                                                                                                                                                                                                                                                                                                                                                                                                                                                                                                                                                                                                                        |                         |                          |                |                         |                |                            |                |                         |                |
| †Total Cancers                                                                                                                                                                                                                                                                                                                                                                                                                                                                                                                                                                                                                                                    | 85,341                  | 1.01 (0.92,1.12)         | 0.93           | 1.01 (0.93,1.11)        | 0.91           | 1.02 (1.00,1.04)           | 0.39           | 1.02 (1.01,1.03)        | 0.00           |
| OBR-cancers                                                                                                                                                                                                                                                                                                                                                                                                                                                                                                                                                                                                                                                       | 12,959                  | 1.05 (0.90,1.21)         | 0.77           | 1.04 (0.91,1.20)        | 0.76           | 1.07 (0.98,1.17)           | 0.79           | 1.08 (0.99,1.17)        | 0.77           |
| NOR-cancers                                                                                                                                                                                                                                                                                                                                                                                                                                                                                                                                                                                                                                                       | 64,743                  | 0.99 (0.92,1.07)         | 0.85           | 0.99 (0.93,1.05)        | 0.84           | 1.00 (0.98,1.02)           | 0.06           | 1.01 (0.99,1.02)        | 0.00           |
| NOR-cancers excluding lung and prostate                                                                                                                                                                                                                                                                                                                                                                                                                                                                                                                                                                                                                           | 26,178                  | 0.99 (0.91,1.07)         | 0.71           | 0.99 (0.92,1.07)        | 0.69           | 1.03 (1.00,1.07)           | 0.13           | 1.04 (0.99,1.08)        | 0.43           |
| <b>Specific cancer sites</b>                                                                                                                                                                                                                                                                                                                                                                                                                                                                                                                                                                                                                                      |                         |                          |                |                         |                |                            |                |                         |                |
| Colorectal                                                                                                                                                                                                                                                                                                                                                                                                                                                                                                                                                                                                                                                        | 6,037                   | 1.02 (0.93,1.13)         | 0.60           | 1.02 (0.94,1.11)        | 0.56           | 1.04 (0.97,1.12)           | 0.38           | 1.04 (0.97,1.12)        | 0.38           |
| Pancreas                                                                                                                                                                                                                                                                                                                                                                                                                                                                                                                                                                                                                                                          | 1,957                   | 0.99 (0.84,1.17)         | 0.36           | 1.00 (0.84,1.19)        | 0.41           | 1.15 (0.94,1.4)            | 0.67           | 1.14 (0.95,1.39)        | 0.67           |
| Kidney                                                                                                                                                                                                                                                                                                                                                                                                                                                                                                                                                                                                                                                            | 1,967                   | 0.99 (0.84,1.17)         | 0.50           | 1.00 (0.84,1.19)        | 0.52           | 1.03 (0.91,1.16)           | 0.31           | 1.04 (0.93,1.15)        | 0.20           |
| Bladder                                                                                                                                                                                                                                                                                                                                                                                                                                                                                                                                                                                                                                                           | 4,018                   | 0.99 (0.88,1.12)         | 0.29           | 1.00 (0.88,1.14)        | 0.30           | 1.02 (0.96,1.09)           | 0.00           | 1.03 (0.97,1.09)        | 0.00           |
| Lung                                                                                                                                                                                                                                                                                                                                                                                                                                                                                                                                                                                                                                                              | 8,559                   | 1.08 (0.87,1.34)         | 0.84           | 1.09 (0.9,1.33)         | 0.82           | 1.09 (0.99,1.21)           | 0.68           | 1.10 (1.03,1.18)        | 0.42           |
| Prostate                                                                                                                                                                                                                                                                                                                                                                                                                                                                                                                                                                                                                                                          | 30,006                  | 0.96 (0.93,0.99)         | 0.06           | 0.96 (0.93,0.99)        | 0.00           | 0.96 (0.92,1.01)           | 0.49           | 0.96 (0.93,0.98)        | 0.17           |
| <b>Women</b>                                                                                                                                                                                                                                                                                                                                                                                                                                                                                                                                                                                                                                                      |                         |                          |                |                         |                |                            |                |                         |                |
| †Total Cancers                                                                                                                                                                                                                                                                                                                                                                                                                                                                                                                                                                                                                                                    | 63,732                  | 1.01 (0.97,1.04)         | 0.80           | 1.01 (0.97,1.05)        | 0.80           | 1.02 (1,1.03)              | 0.00           | 1.03 (1.01,1.04)        | 0.04           |
| OBR-cancers                                                                                                                                                                                                                                                                                                                                                                                                                                                                                                                                                                                                                                                       | 36,509                  | 1.01 (0.97,1.04)         | 0.69           | 1.01 (0.97,1.05)        | 0.72           | 1.02 (1.01,1.04)           | 0.00           | 1.03 (1.00,1.05)        | 0.23           |
| NOR-cancers                                                                                                                                                                                                                                                                                                                                                                                                                                                                                                                                                                                                                                                       | 24,499                  | 1.02 (0.94,1.11)         | 0.84           | 1.03 (0.95,1.1)         | 0.78           | 1.03 (0.99,1.06)           | 0.34           | 1.04 (1.00,1.07)        | 0.22           |
| NOR-cancers excluding lung                                                                                                                                                                                                                                                                                                                                                                                                                                                                                                                                                                                                                                        | 16,352                  | 1.01 (0.96,1.07)         | 0.66           | 1.02 (0.97,1.08)        | 0.61           | 1.03 (1,1.06)              | 0.00           | 1.04 (1.02,1.06)        | 0.00           |
| <b>Specific cancer sites</b>                                                                                                                                                                                                                                                                                                                                                                                                                                                                                                                                                                                                                                      |                         |                          |                |                         |                |                            |                |                         |                |
| Colorectal                                                                                                                                                                                                                                                                                                                                                                                                                                                                                                                                                                                                                                                        | 6,251                   | 1.03 (0.97,1.09)         | 0.27           | 1.03 (0.98,1.09)        | 0.24           | 1.05 (1.01,1.08)           | 0.00           | 1.04 (1.01,1.08)        | 0.00           |
| Pancreas                                                                                                                                                                                                                                                                                                                                                                                                                                                                                                                                                                                                                                                          | 2,019                   | 0.94 (0.78,1.12)         | 0.52           | 0.94 (0.79,1.13)        | 0.53           | 1.02 (0.89,1.18)           | 0.6            | 1.03 (0.89,1.18)        | 0.58           |
| Kidney                                                                                                                                                                                                                                                                                                                                                                                                                                                                                                                                                                                                                                                            | 1,270                   | 0.98 (0.86,1.12)         | 0.58           | 0.98 (0.86,1.11)        | 0.50           | 1.1 (1.03,1.17)            | 0.00           | 1.08 (1.02,1.15)        | 0.00           |
| Lung                                                                                                                                                                                                                                                                                                                                                                                                                                                                                                                                                                                                                                                              | 8,114                   | 0.99 (0.85,1.16)         | 0.82           | 1.00 (0.86,1.15)        | 0.79           | 1.01 (0.92,1.1)            | 0.71           | 1.03 (0.94,1.13)        | 0.73           |
| Endometrial                                                                                                                                                                                                                                                                                                                                                                                                                                                                                                                                                                                                                                                       | 3,931                   | 1.09 (1.00,1.18)         | 0.85           | 1.09 (1.01,1.16)        | 0.79           | 1.08 (0.95,1.23)           | 0.88           | 1.08 (0.96,1.22)        | 0.84           |
| Ovarian                                                                                                                                                                                                                                                                                                                                                                                                                                                                                                                                                                                                                                                           | 2,717                   | 1.05 (1.00,1.1)          | 0.00           | 1.06 (1.01,1.11)        | 0.00           | 1.08 (1.00,1.17)           | 0.15           | 1.09 (0.99,1.19)        | 0.33           |
| Post-menopausal breast cancer                                                                                                                                                                                                                                                                                                                                                                                                                                                                                                                                                                                                                                     | 17,582                  | 0.95 (0.91,0.98)         | 0.23           | 0.95 (0.91,0.99)        | 0.31           | 0.98 (0.96,1.00)           | 0.00           | 0.98 (0.96,1.00)        | 0.00           |
| <p>*Multivariable adjusted models: baseline age, ethnicity, alcohol, smoking, HRT.<br/>         † The sum of OBR and NOR cancer does not equal total cancers as non-melanoma skin cancers were excluded in the EPIC cohort analyses.<br/>         Degree of overweight is the cumulative sum of the number of BMI units <math>\geq 30</math> kg/m<sup>2</sup><br/>         Duration of overweight is the cumulative sum of the duration overweight (BMI <math>\geq 30</math> kg/m<sup>2</sup>).<br/> <b>Abbreviations:</b> OBR, obesity-related; NOR, non-obesity-related; CI, confidence interval; HR, hazard ratio; BMI, body mass index; MV, multivariable</p> |                         |                          |                |                         |                |                            |                |                         |                |



**Table S24: Comparison of the obesity degree and duration per 10 units and per 10 years respectively, ABACus 2 Consortium.**

| Outcomes                                                                                                                                                                                                                                                                                                                                                                                                                                                                                                                                                                                                                                                           | Number of cancer events | Degree of Obese (per 10 units) |                |                         |                | Duration of Obese (per 10 years) |                |                         |                |
|--------------------------------------------------------------------------------------------------------------------------------------------------------------------------------------------------------------------------------------------------------------------------------------------------------------------------------------------------------------------------------------------------------------------------------------------------------------------------------------------------------------------------------------------------------------------------------------------------------------------------------------------------------------------|-------------------------|--------------------------------|----------------|-------------------------|----------------|----------------------------------|----------------|-------------------------|----------------|
|                                                                                                                                                                                                                                                                                                                                                                                                                                                                                                                                                                                                                                                                    |                         | Age-adjusted HR (95% CI)       | I <sup>2</sup> | MV-adjusted HR (95% CI) | I <sup>2</sup> | Age-adjusted HR (95% CI)         | I <sup>2</sup> | MV-adjusted HR (95% CI) | I <sup>2</sup> |
| <b>Men</b>                                                                                                                                                                                                                                                                                                                                                                                                                                                                                                                                                                                                                                                         |                         |                                |                |                         |                |                                  |                |                         |                |
| †Total Cancers                                                                                                                                                                                                                                                                                                                                                                                                                                                                                                                                                                                                                                                     | 85,341                  | 1.06 (0.85,1.32)               | 0.92           | 1.05 (0.87,1.28)        | 0.90           | 1.02 (1.00,1.03)                 | 0.18           | 1.02 (1.00,1.04)        | 0.39           |
| OBR-cancers                                                                                                                                                                                                                                                                                                                                                                                                                                                                                                                                                                                                                                                        | 12,959                  | 1.13 (0.8,1.6)                 | 0.79           | 1.13 (0.81,1.58)        | 0.79           | 1.06 (0.99,1.14)                 | 0.77           | 1.06 (0.99,1.14)        | 0.77           |
| NOR-cancers                                                                                                                                                                                                                                                                                                                                                                                                                                                                                                                                                                                                                                                        | 64,743                  | 0.99 (0.84,1.16)               | 0.85           | 0.98 (0.86,1.12)        | 0.81           | 1.00 (0.99,1.02)                 | 0.00           | 1.00 (0.99,1.01)        | 0.00           |
| NOR-cancers excluding lung and prostate                                                                                                                                                                                                                                                                                                                                                                                                                                                                                                                                                                                                                            | 26,178                  | 0.97 (0.82,1.15)               | 0.70           | 0.98 (0.83,1.16)        | 0.67           | 1.03 (1.00,1.06)                 | 0.00           | 1.03 (0.99,1.07)        | 0.37           |
| <b>Specific cancer sites</b>                                                                                                                                                                                                                                                                                                                                                                                                                                                                                                                                                                                                                                       |                         |                                |                |                         |                |                                  |                |                         |                |
| Colorectal                                                                                                                                                                                                                                                                                                                                                                                                                                                                                                                                                                                                                                                         | 6,037                   | 1.07 (0.79,1.45)               | 0.61           | 1.07 (0.80,1.43)        | 0.60           | 1.04 (0.97,1.11)                 | 0.48           | 1.04 (0.98,1.10)        | 0.35           |
| Pancreas                                                                                                                                                                                                                                                                                                                                                                                                                                                                                                                                                                                                                                                           | 1,957                   | 0.97 (0.66,1.42)               | 0.35           | 0.97 (0.64,1.45)        | 0.38           | 1.12 (0.96,1.32)                 | 0.68           | 1.12 (0.96,1.31)        | 0.67           |
| Kidney                                                                                                                                                                                                                                                                                                                                                                                                                                                                                                                                                                                                                                                             | 1,967                   | 1.00 (0.68,1.45)               | 0.54           | 0.99 (0.69,1.42)        | 0.49           | 1.03 (0.93,1.13)                 | 0.26           | 1.03 (0.93,1.13)        | 0.26           |
| Bladder                                                                                                                                                                                                                                                                                                                                                                                                                                                                                                                                                                                                                                                            | 4,018                   | 0.95 (0.74,1.22)               | 0.23           | 0.97 (0.75,1.26)        | 0.26           | 1.01 (0.96,1.07)                 | 0.00           | 1.02 (0.97,1.07)        | 0.00           |
| Lung                                                                                                                                                                                                                                                                                                                                                                                                                                                                                                                                                                                                                                                               | 8,559                   | 1.28 (0.71,2.30)               | 0.87           | 1.32 (0.75,2.33)        | 0.87           | 1.07 (1.00,1.15)                 | 0.54           | 1.09 (1.03,1.15)        | 0.32           |
| Prostate                                                                                                                                                                                                                                                                                                                                                                                                                                                                                                                                                                                                                                                           | 30,006                  | 0.91 (0.84,0.99)               | 0.21           | 0.91 (0.87,0.95)        | 0.00           | 0.97 (0.94,0.99)                 | 0.37           | 0.97 (0.94,0.99)        | 0.24           |
| <b>Women</b>                                                                                                                                                                                                                                                                                                                                                                                                                                                                                                                                                                                                                                                       |                         |                                |                |                         |                |                                  |                |                         |                |
| †Total Cancers                                                                                                                                                                                                                                                                                                                                                                                                                                                                                                                                                                                                                                                     | 63,732                  | 1.01 (0.96,1.07)               | 0.81           | 1.02 (0.96,1.08)        | 0.84           | 1.02 (1.00,1.03)                 | 0.15           | 1.02 (1.00,1.04)        | 0.41           |
| OBR-cancers                                                                                                                                                                                                                                                                                                                                                                                                                                                                                                                                                                                                                                                        | 36,509                  | 1.01 (0.96,1.07)               | 0.69           | 1.02 (0.96,1.08)        | 0.74           | 1.02 (1.00,1.03)                 | 0.00           | 1.02 (1.01,1.04)        | 0.02           |
| NOR-cancers                                                                                                                                                                                                                                                                                                                                                                                                                                                                                                                                                                                                                                                        | 24,499                  | 1.05 (0.88,1.25)               | 0.85           | 1.04 (0.89,1.21)        | 0.82           | 1.02 (0.99,1.06)                 | 0.56           | 1.03 (1.00,1.06)        | 0.24           |
| NOR-cancers excluding lung                                                                                                                                                                                                                                                                                                                                                                                                                                                                                                                                                                                                                                         | 16,352                  | 1.02 (0.94,1.12)               | 0.7            | 1.03 (0.95,1.12)        | 0.66           | 1.03 (0.99,1.06)                 | 0.33           | 1.03 (1.01,1.05)        | 0.00           |
| <b>Specific cancer sites</b>                                                                                                                                                                                                                                                                                                                                                                                                                                                                                                                                                                                                                                       |                         |                                |                |                         |                |                                  |                |                         |                |
| Colorectal                                                                                                                                                                                                                                                                                                                                                                                                                                                                                                                                                                                                                                                         | 6,251                   | 1.04 (0.92,1.17)               | 0.50           | 1.04 (0.94,1.15)        | 0.37           | 1.04 (1.02,1.06)                 | 0.00           | 1.04 (1.02,1.06)        | 0.00           |
| Pancreas                                                                                                                                                                                                                                                                                                                                                                                                                                                                                                                                                                                                                                                           | 2,019                   | 0.90 (0.69,1.17)               | 0.46           | 0.90 (0.69,1.19)        | 0.48           | 1.02 (0.9,1.16)                  | 0.63           | 1.02 (0.91,1.15)        | 0.6            |
| Kidney                                                                                                                                                                                                                                                                                                                                                                                                                                                                                                                                                                                                                                                             | 1,270                   | 0.99 (0.8,1.23)                | 0.57           | 0.99 (0.81,1.21)        | 0.47           | 1.08 (1.01,1.15)                 | 0.00           | 1.07 (1.01,1.13)        | 0.00           |
| Lung                                                                                                                                                                                                                                                                                                                                                                                                                                                                                                                                                                                                                                                               | 8,114                   | 1.03 (0.74,1.45)               | 0.8            | 1.03 (0.76,1.39)        | 0.77           | 1.01 (0.93,1.09)                 | 0.72           | 1.03 (0.95,1.12)        | 0.73           |
| Endometrial                                                                                                                                                                                                                                                                                                                                                                                                                                                                                                                                                                                                                                                        | 3,931                   | 1.15 (1.00,1.32)               | 0.89           | 1.14 (1.01,1.29)        | 0.85           | 1.07 (0.94,1.21)                 | 0.91           | 1.07 (0.96,1.2)         | 0.88           |
| Ovarian                                                                                                                                                                                                                                                                                                                                                                                                                                                                                                                                                                                                                                                            | 2,717                   | 1.07 (0.98,1.16)               | 0.00           | 1.07 (0.99,1.16)        | 0.00           | 1.07 (0.99,1.15)                 | 0.28           | 1.07 (1,1.16)           | 0.31           |
| Post-menopausal breast cancer                                                                                                                                                                                                                                                                                                                                                                                                                                                                                                                                                                                                                                      | 17,582                  | 0.91 (0.88,0.94)               | 0.00           | 0.91 (0.87,0.95)        | 0.00           | 0.98 (0.96,1.00)                 | 0.00           | 0.98 (0.96,1.01)        | 0.00           |
| <p>*Multivariable adjusted models: baseline age, ethnicity, alcohol, smoking, HRT.<br/>         † The sum of OBR and NOR cancer does not equal total cancers as non-melanoma skin cancers were excluded in the EPIC cohort analyses.<br/>         Degree of overweight is the cumulative sum of the number of BMI units <math>\geq 30</math> kg/m<sup>2</sup><br/>         Duration of overweight is the cumulative sum of the duration overweight (BMI <math>\geq 30</math> kg/m<sup>2</sup>).<br/> <b>Abbreviations:</b> OBR, obesity-related; NOR, non-obesity-related; CI, confidence interval; HR, hazard ratio; BMI, body mass index; MV, multivariable.</p> |                         |                                |                |                         |                |                                  |                |                         |                |

**Table S25: Comparison of Harrell's C-statistic of the metrics, ABACus 2 Consortium.**

| Harrell's C-statistic(95% CI)           |                         |                         |                                                                |                                 |                                                                                           |                                                                         |                         |                      |                                                                  |
|-----------------------------------------|-------------------------|-------------------------|----------------------------------------------------------------|---------------------------------|-------------------------------------------------------------------------------------------|-------------------------------------------------------------------------|-------------------------|----------------------|------------------------------------------------------------------|
| Characteristic                          | Obese-years             | Baseline BMI            | Difference in c-statistic between baseline BMI and obese-years | Obese - years with baseline BMI | Difference in c-statistic between obese-years with BMI combined compared with obese-years | Difference in c-statistic between obese-years with BMI combined and BMI | Degree of obesity       | Duration of obesity  | Difference in c-statistic between duration and degree of obesity |
| <b>Men</b>                              |                         |                         |                                                                |                                 |                                                                                           |                                                                         |                         |                      |                                                                  |
| Total Cancers                           | 0.599<br>(0.567, 0.630) | 0.600<br>(0.569, 0.630) | -0.000<br>(-0.001, 0.000)                                      | 0.600<br>(0.568, 0.630)         | -0.000<br>(-0.000, 0.000)                                                                 | 0.000<br>(-0.000, 0.001)                                                | 0.599<br>(0.567, 0.631) | 0.600 (0.569, 0.631) | -0.000<br>(-0.001, 0.000)                                        |
| OR-cancers                              | 0.606<br>(0.574, 0.638) | 0.612<br>(0.579, 0.644) | 0.006<br>(0.002, 0.009)                                        | 0.606<br>(0.563, 0.647)         | 0.006<br>(0.003, 0.010)                                                                   | 0.001<br>(-0.000, 0.002)                                                | 0.609<br>(0.576, 0.642) | 0.613 (0.582, 0.642) | 0.003<br>(-0.005, 0.011)                                         |
| NOR-cancers                             | 0.601<br>(0.567, 0.634) | 0.601<br>(0.567, 0.634) | 0.000<br>(-0.001, 0.001)                                       | 0.602<br>(0.559, 0.644)         | 0.001<br>(-0.000, 0.002)                                                                  | 0.000<br>(-0.000, 0.001)                                                | 0.601<br>(0.569, 0.633) | 0.599 (0.562, 0.634) | 0.000<br>(-0.000, 0.001)                                         |
| NOR-cancers excluding lung and prostate | 0.611<br>(0.538, 0.679) | 0.610<br>(0.539, 0.677) | -0.001<br>(-0.003, 0.002)                                      | 0.609<br>(0.534, 0.679)         | -0.001<br>(-0.003, 0.002)                                                                 | 0.000<br>(-0.001, 0.001)                                                | 0.610<br>(0.539, 0.677) | 0.611 (0.538, 0.679) | 0.001<br>(-0.001, 0.003)                                         |
| <b>Specific cancer sites</b>            |                         |                         |                                                                |                                 |                                                                                           |                                                                         |                         |                      |                                                                  |
| Colorectal                              | 0.623<br>(0.581, 0.662) | 0.624<br>(0.586, 0.661) | 0.003<br>(-0.001, 0.007)                                       | 0.626<br>(0.584, 0.666)         | 0.004<br>(0.000, 0.007)                                                                   | 0.001<br>(-0.001, 0.002)                                                | 0.628<br>(0.575, 0.678) | 0.625 (0.584, 0.665) | -0.001<br>(-0.003, 0.002)                                        |
| Pancreas                                | 0.616<br>(0.555, 0.674) | 0.620<br>(0.549, 0.687) | 0.002<br>(-0.003, 0.007)                                       | 0.623<br>(0.556, 0.685)         | 0.004<br>(-0.003, 0.011)                                                                  | 0.006<br>(-0.006, 0.018)                                                | 0.619<br>(0.537, 0.695) | 0.628 (0.569, 0.684) | 0.005<br>(-0.004, 0.015)                                         |
| Kidney                                  | 0.577<br>(0.549, 0.605) | 0.598<br>(0.588, 0.608) | 0.013<br>(-0.004, 0.030)                                       | 0.598<br>(0.588, 0.608)         | 0.014<br>(-0.003, 0.030)                                                                  | 0.001<br>(-0.003, 0.006)                                                | 0.581<br>(0.553, 0.609) | 0.591 (0.566, 0.615) | 0.009<br>(0.001, 0.017)                                          |
| Bladder                                 | 0.700<br>(0.635, 0.758) | 0.700<br>(0.634, 0.759) | -0.000<br>(-0.025, 0.024)                                      | 0.706<br>(0.639, 0.765)         | 0.005<br>(-0.012, 0.023)                                                                  | 0.006<br>(-0.011, 0.022)                                                | 0.698<br>(0.633, 0.755) | 0.697 (0.633, 0.754) | -0.001<br>(-0.013, 0.012)                                        |
| Lung                                    | 0.721<br>(0.695, 0.745) | 0.726<br>(0.698, 0.753) | 0.004<br>(0.000, 0.007)                                        | 0.726<br>(0.699, 0.752)         | 0.004<br>(0.002, 0.006)                                                                   | 0.000<br>(-0.000, 0.001)                                                | 0.723<br>(0.695, 0.749) | 0.721 (0.696, 0.744) | -0.000<br>(-0.002, 0.002)                                        |
| Prostate                                | 0.598<br>(0.570, 0.626) | 0.599<br>(0.571, 0.627) | 0.000<br>(-0.001, 0.002)                                       | 0.598<br>(0.568, 0.628)         | 0.000<br>(-0.001, 0.001)                                                                  | -0.000<br>(-0.001, 0.000)                                               | 0.598<br>(0.567, 0.629) | 0.600 (0.572, 0.627) | -0.000<br>(-0.001, 0.001)                                        |
| <b>Women</b>                            |                         |                         |                                                                |                                 |                                                                                           |                                                                         |                         |                      |                                                                  |
| Total Cancers                           | 0.579<br>(0.557, 0.600) | 0.581<br>(0.561, 0.601) | 0.001<br>(-0.000, 0.001)                                       | 0.579<br>(0.554, 0.603)         | 0.001<br>(-0.000, 0.001)                                                                  | 0.000<br>(-0.000, 0.000)                                                | 0.582<br>(0.561, 0.603) | 0.581 (0.561, 0.602) | -0.000<br>(-0.001, 0.001)                                        |
| OR-cancers                              | 0.559<br>(0.528, 0.590) | 0.569<br>(0.542, 0.597) | 0.007<br>(-0.000, 0.014)                                       | 0.567<br>(0.539, 0.594)         | 0.007<br>(0.001, 0.013)                                                                   | 0.000<br>(-0.000, 0.000)                                                | 0.564<br>(0.534, 0.593) | 0.566 (0.538, 0.594) | -0.000<br>(-0.002, 0.001)                                        |
| NOR-cancers                             | 0.640<br>(0.581, 0.696) | 0.642<br>(0.579, 0.699) | 0.001<br>(-0.002, 0.004)                                       | 0.641<br>(0.578, 0.699)         | 0.002<br>(0.000, 0.004)                                                                   | 0.000<br>(-0.000, 0.001)                                                | 0.641<br>(0.582, 0.696) | 0.641 (0.581, 0.696) | 0.001<br>(0.000, 0.002)                                          |
| NOR-cancers excluding lung              | 0.588<br>(0.542, 0.633) | 0.590<br>(0.543, 0.636) | 0.000<br>(-0.002, 0.003)                                       | 0.590<br>(0.542, 0.636)         | 0.002<br>(-0.001, 0.004)                                                                  | 0.000<br>(-0.000, 0.000)                                                | 0.589<br>(0.541, 0.635) | 0.589 (0.543, 0.634) | 0.002<br>(-0.003, 0.006)                                         |
| <b>Specific cancer sites</b>            |                         |                         |                                                                |                                 |                                                                                           |                                                                         |                         |                      |                                                                  |
| Colorectal                              | 0.622<br>(0.546, 0.693) | 0.632<br>(0.577, 0.684) | -0.000<br>(-0.002, 0.002)                                      | 0.633<br>(0.575, 0.687)         | -0.000<br>(-0.001, 0.001)                                                                 | -0.000<br>(-0.000, 0.000)                                               | 0.627<br>(0.561, 0.688) | 0.629 (0.566, 0.688) | -0.000<br>(-0.001, 0.001)                                        |
| Pancreas                                | 0.633<br>(0.584, 0.679) | 0.634<br>(0.583, 0.683) | 0.001<br>(-0.001, 0.003)                                       | 0.636<br>(0.585, 0.685)         | 0.000<br>(-0.001, 0.002)                                                                  | -0.000<br>(-0.002, 0.002)                                               | 0.635<br>(0.584, 0.683) | 0.632 (0.584, 0.678) | -0.001<br>(-0.005, 0.004)                                        |
| Kidney                                  | 0.591<br>(0.561, 0.620) | 0.626<br>(0.606, 0.646) | 0.019<br>(0.005, 0.032)                                        | 0.645<br>(0.607, 0.681)         | 0.018<br>(0.004, 0.032)                                                                   | -0.001<br>(-0.003, 0.001)                                               | 0.600<br>(0.572, 0.628) | 0.614 (0.594, 0.633) | 0.011<br>(-0.001, 0.024)                                         |
| Lung                                    | 0.633<br>(0.584, 0.679) | 0.634<br>(0.583, 0.683) | 0.002<br>(-0.001, 0.006)                                       | 0.636<br>(0.585, 0.685)         | 0.002<br>(-0.001, 0.005)                                                                  | 0.000<br>(-0.000, 0.001)                                                | 0.635<br>(0.584, 0.683) | 0.632 (0.584, 0.678) | -0.000<br>(-0.003, 0.003)                                        |
| Endometrial                             | 0.591<br>(0.561, 0.620) | 0.626<br>(0.606, 0.646) | 0.022<br>(0.011, 0.034)                                        | 0.645<br>(0.607, 0.681)         | 0.020<br>(0.011, 0.028)                                                                   | 0.000<br>(-0.000, 0.001)                                                | 0.600<br>(0.572, 0.628) | 0.614 (0.594, 0.633) | -0.007<br>(-0.011, -0.002)                                       |
| Ovarian                                 | 0.743<br>(0.713, 0.772) | 0.746<br>(0.715, 0.775) | -0.001<br>(-0.005, 0.003)                                      | 0.748<br>(0.715, 0.778)         | 0.001<br>(-0.003, 0.004)                                                                  | 0.001<br>(-0.002, 0.004)                                                | 0.745<br>(0.713, 0.775) | 0.744 (0.713, 0.772) | 0.001<br>(-0.003, 0.006)                                         |
| Post-menopausal breast cancer           | 0.595<br>(0.560, 0.629) | 0.626<br>(0.581, 0.669) | 0.004<br>(0.002, 0.007)                                        | 0.627<br>(0.580, 0.671)         | 0.005<br>(0.002, 0.007)                                                                   | 0.000<br>(-0.001, 0.001)                                                | 0.616<br>(0.571, 0.659) | 0.613 (0.579, 0.645) | -0.000<br>(-0.001, 0.001)                                        |

Key: Green – significant difference in C-statistic.  
 \*All models were multivariable adjusted, including baseline age, ethnicity, alcohol, smoking, HRT.  
**Abbreviations:** SE, standard error; OR, obesity-related; NOR, non-obesity-related; BMI, body mass index.

**b) Findings from analysis using predicted BMI from participants with at least 1 measured BMI readings**

**Analysis of overweight-years exposure**

**Table S26: Hazard ratio of cancers per standard deviation of overweight-years and BMI, ABACus 2 Consortium.**

| Outcomes                                | Number of cancer events | Overweight-years (per SD) |                |                         |                | BMI (per SD)             |                |                         |                |
|-----------------------------------------|-------------------------|---------------------------|----------------|-------------------------|----------------|--------------------------|----------------|-------------------------|----------------|
|                                         |                         | Age-adjusted HR (95% CI)  | I <sup>2</sup> | MV-adjusted HR (95% CI) | I <sup>2</sup> | Age-adjusted HR (95% CI) | I <sup>2</sup> | MV-adjusted HR (95% CI) | I <sup>2</sup> |
| <b>Men</b>                              |                         |                           |                |                         |                |                          |                |                         |                |
| †Total Cancers                          | 130,704                 | 1.02 (0.99,1.05)          | 0.75           | 1.02 (0.99,1.05)        | 0.75           | 1.02 (0.99,1.04)         | 0.73           | 1.01 (0.98,1.04)        | 0.72           |
| OBR-cancers                             | 23,060                  | 1.15 (1.15,1.16)          | 0.00           | 1.15 (1.14,1.16)        | 0.00           | 1.17 (1.16,1.18)         | 0.00           | 1.17 (1.16,1.18)        | 0.00           |
| NOR-cancers                             | 72,342                  | 0.97 (0.94,1.00)          | 0.74           | 0.97 (0.94,1.00)        | 0.67           | 0.96 (0.94,0.99)         | 0.60           | 0.96 (0.93,0.99)        | 0.73           |
| NOR-cancers excluding lung and prostate | 9,663                   | 1.05 (1.01,1.09)          | 0.31           | 1.04 (1.00,1.08)        | 0.2            | 1.05 (1.02,1.08)         | 0.00           | 1.04 (1.01,1.07)        | 0.00           |
| <b>Specific cancer sites</b>            |                         |                           |                |                         |                |                          |                |                         |                |
| Colorectal                              | 11,063                  | 1.13 (1.08,1.18)          | 0.63           | 1.13 (1.08,1.18)        | 0.6            | 1.15 (1.11,1.19)         | 0.18           | 1.15 (1.11,1.19)        | 0.32           |
| Pancreas                                | 3,351                   | 1.1 (1.05,1.15)           | 0.00           | 1.10 (1.05,1.15)        | 0.00           | 1.09 (1.03,1.15)         | 0.10           | 1.1 (1.04,1.16)         | 0.03           |
| Kidney                                  | 3,398                   | 1.2 (1.14,1.26)           | 0.13           | 1.19 (1.13,1.25)        | 0.18           | 1.24 (1.13,1.35)         | 0.44           | 1.23 (1.13,1.34)        | 0.42           |
| Bladder                                 | 2,787                   | 1.08 (0.99,1.18)          | 0.12           | 1.07 (0.97,1.18)        | 0.21           | 1.08 (1.01,1.16)         | 0.00           | 1.07 (0.99,1.15)        | 0.00           |
| Lung                                    | 14,545                  | 0.94 (0.89,0.99)          | 0.59           | 0.92 (0.87,0.98)        | 0.68           | 0.86 (0.75,0.99)         | 0.90           | 0.84 (0.75,0.94)        | 0.90           |
| Prostate                                | 48,116                  | 0.96 (0.91,1.02)          | 0.77           | 0.96 (0.91,1.01)        | 0.75           | 0.97 (0.91,1.04)         | 0.89           | 0.97 (0.92,1.02)        | 0.80           |
| <b>Women</b>                            |                         |                           |                |                         |                |                          |                |                         |                |
| †Total Cancers                          | 98,690                  | 1.04 (1.03,1.05)          | 0.00           | 1.05 (1.04,1.07)        | 0.53           | 1.05 (1.01,1.08)         | 0.77           | 1.06 (1.02,1.10)        | 0.80           |
| OBR-cancers                             | 55,712                  | 1.09 (1.05,1.13)          | 0.86           | 1.10 (1.06,1.14)        | 0.87           | 1.11 (1.08,1.14)         | 0.76           | 1.12 (1.08,1.16)        | 0.86           |
| NOR-cancers                             | 26,718                  | 0.94 (0.89,0.99)          | 0.87           | 0.96 (0.92,1.01)        | 0.82           | 0.91 (0.83,1.01)         | 0.94           | 0.94 (0.84,1.05)        | 0.93           |
| NOR-cancers excluding lung              | 13,736                  | 1.01 (0.96,1.05)          | 0.44           | 1.02 (0.99,1.05)        | 0.29           | 0.99 (0.9,1.09)          | 0.80           | 1.01 (0.91,1.13)        | 0.79           |
| <b>Specific cancer sites</b>            |                         |                           |                |                         |                |                          |                |                         |                |
| Colorectal                              | 10,026                  | 1.08 (1.05,1.11)          | 0.07           | 1.08 (1.05,1.10)        | 0.00           | 1.09 (1.05,1.14)         | 0.38           | 1.08 (1.05,1.12)        | 0.15           |
| Pancreas                                | 3,172                   | 1.02 (0.95,1.10)          | 0.59           | 1.02 (0.96,1.08)        | 0.35           | 1.01 (0.96,1.07)         | 0.08           | 1.01 (0.98,1.05)        | 0.00           |
| Kidney                                  | 2,069                   | 1.23 (1.17,1.29)          | 0.11           | 1.22 (1.15,1.29)        | 0.36           | 1.31 (1.18,1.45)         | 0.84           | 1.30 (1.18,1.44)        | 0.84           |
| Lung                                    | 12,894                  | 0.87 (0.84,0.90)          | 0.27           | 0.90 (0.87,0.93)        | 0.16           | 0.84 (0.80,0.89)         | 0.66           | 0.87 (0.83,0.90)        | 0.41           |
| Endometrial                             | 6,138                   | 1.30 (1.22,1.38)          | 0.82           | 1.31 (1.25,1.37)        | 0.62           | 1.36 (1.21,1.53)         | 0.93           | 1.4 (1.21,1.62)         | 0.94           |
| Ovarian                                 | 4,092                   | 1.02 (0.95,1.10)          | 0.68           | 1.03 (0.96,1.11)        | 0.60           | 1.00 (0.91,1.10)         | 0.77           | 1.02 (0.93,1.12)        | 0.72           |
| Post-menopausal breast cancer           | 25,512                  | 1.01 (1.00,1.03)          | 0.10           | 1.03 (1.1,1.06)         | 0.40           | 1.05 (1.01,1.09)         | 0.62           | 1.07 (1.02,1.12)        | 0.72           |

\*Multivariable adjusted models: baseline age, ethnicity, alcohol, smoking, HRT.  
† The sum of OBR and NOR cancer does not equal total cancers as non-melanoma skin cancers were excluded in the EPIC cohort analyses.  
**Abbreviations:** OBR, obesity-related; NOR, non-obesity-related; CI, confidence interval; HR, hazard ratio; BMI, body mass index; MV, multivariable; SD, standard deviation.

**Table S27: Hazard ratio of specific cancers per 100 overweight-years and per 5-unit baseline BMI, ABACus 2 Consortium.**

| Outcomes                                                                                                                                                                          | Number of cancer events | Overweight-years (per 100 kg-years/m <sup>2</sup> ) |                |                         |                | BMI (per 5 units)        |                |                         |                |
|-----------------------------------------------------------------------------------------------------------------------------------------------------------------------------------|-------------------------|-----------------------------------------------------|----------------|-------------------------|----------------|--------------------------|----------------|-------------------------|----------------|
|                                                                                                                                                                                   |                         | Age-adjusted HR (95% CI)                            | I <sup>2</sup> | MV-adjusted HR (95% CI) | I <sup>2</sup> | Age-adjusted HR (95% CI) | I <sup>2</sup> | MV-adjusted HR (95% CI) | I <sup>2</sup> |
| <b>Men</b>                                                                                                                                                                        |                         |                                                     |                |                         |                |                          |                |                         |                |
| †Total Cancers                                                                                                                                                                    | 130,704                 | 1.03<br>(0.99,1.08)                                 | 0.83           | 1.03<br>(0.98,1.08)     | 0.86           | 1.02<br>(0.99,1.05)      | 0.67           | 1.01<br>(0.98,1.05)     | 0.68           |
| OBR-cancers                                                                                                                                                                       | 23,060                  | 1.21<br>(1.19,1.22)                                 | 0.00           | 1.22<br>(1.19,1.24)     | 0.00           | 1.2<br>(1.19,1.21)       | 0.00           | 1.2<br>(1.19,1.21)      | 0.00           |
| NOR-cancers                                                                                                                                                                       | 72,342                  | 0.95<br>(0.90,1.00)                                 | 0.58           | 0.94<br>(0.92,0.97)     | 0.33           | 0.95<br>(0.89,1.02)      | 0.86           | 0.95<br>(0.89,1.01)     | 0.71           |
| NOR-cancers excluding lung and prostate                                                                                                                                           | 9,663                   | 1.06<br>(0.98,1.15)                                 | 0.40           | 1.05<br>(0.97,1.15)     | 0.51           | 1.05<br>(1.01,1.1)       | 0.00           | 1.04<br>(0.98,1.11)     | 0.13           |
| <b>Specific cancer sites</b>                                                                                                                                                      |                         |                                                     |                |                         |                |                          |                |                         |                |
| Colorectal                                                                                                                                                                        | 11,063                  | 1.26<br>(0.85,1.86)                                 | 0.81           | 1.26<br>(0.86,1.83)     | 0.80           | 1.18<br>(1.10,1.26)      | 0.47           | 1.18<br>(1.10,1.26)     | 0.42           |
| Pancreas                                                                                                                                                                          | 3,351                   | 1.12<br>(1.01,1.25)                                 | 0.00           | 1.13<br>(1.03,1.23)     | 0.00           | 1.09<br>(0.97,1.23)      | 0.00           | 1.09<br>(0.95,1.25)     | 0.09           |
| Kidney                                                                                                                                                                            | 3,398                   | 1.27<br>(1.16,1.39)                                 | 0.08           | 1.26<br>(1.15,1.38)     | 0.09           | 1.26<br>(1.15,1.39)      | 0.35           | 1.26<br>(1.16,1.38)     | 0.21           |
| Bladder                                                                                                                                                                           | 2,787                   | 1.12<br>(0.91,1.39)                                 | 0.00           | 1.12<br>(0.88,1.43)     | 0.00           | 1.11<br>(1.00,1.23)      | 0.00           | 1.10<br>(0.96,1.27)     | 0.00           |
| Lung                                                                                                                                                                              | 14,545                  | 0.93<br>(0.81,1.07)                                 | 0.67           | 0.91<br>(0.81,1.04)     | 0.63           | 0.85<br>(0.64,1.13)      | 0.89           | 0.83<br>(0.66,1.05)     | 0.90           |
| Prostate                                                                                                                                                                          | 48,116                  | 0.95<br>(0.81,1.11)                                 | 0.79           | 0.93<br>(0.83,1.04)     | 0.68           | 0.96<br>(0.83,1.11)      | 0.86           | 0.95<br>(0.85,1.07)     | 0.72           |
| <b>Women</b>                                                                                                                                                                      |                         |                                                     |                |                         |                |                          |                |                         |                |
| †Total Cancers                                                                                                                                                                    | 98,690                  | 1.05<br>(1.03,1.06)                                 | 0.62           | 1.06<br>(1.04,1.08)     | 0.64           | 1.04<br>(1.01,1.07)      | 0.83           | 1.05<br>(1.02,1.09)     | 0.85           |
| OBR-cancers                                                                                                                                                                       | 55,712                  | 1.10<br>(1.09,1.11)                                 | 0.00           | 1.11<br>(1.09,1.12)     | 0.00           | 1.10<br>(1.07,1.13)      | 0.84           | 1.11<br>(1.08,1.14)     | 0.84           |
| NOR-cancers                                                                                                                                                                       | 26,718                  | 0.93<br>(0.87,1.00)                                 | 0.9            | 0.95<br>(0.90,1.02)     | 0.87           | 0.91<br>(0.82,1.01)      | 0.94           | 0.94<br>(0.84,1.05)     | 0.94           |
| NOR-cancers excluding lung                                                                                                                                                        | 13,736                  | 1.01<br>(0.96,1.06)                                 | 0.51           | 1.02<br>(1.00,1.05)     | 0.23           | 0.99<br>(0.90,1.10)      | 0.83           | 1.01<br>(0.91,1.12)     | 0.77           |
| <b>Specific cancer sites</b>                                                                                                                                                      |                         |                                                     |                |                         |                |                          |                |                         |                |
| Colorectal                                                                                                                                                                        | 10,026                  | 1.09<br>(1.07,1.11)                                 | 0.00           | 1.09<br>(1.07,1.10)     | 0.00           | 1.08<br>(1.05,1.11)      | 0.13           | 1.08<br>(1.05,1.10)     | 0.07           |
| Pancreas                                                                                                                                                                          | 3,172                   | 1.02<br>(0.94,1.10)                                 | 0.59           | 1.02<br>(0.95,1.09)     | 0.37           | 1.01<br>(0.96,1.06)      | 0.02           | 1.01<br>(0.98,1.04)     | 0.00           |
| Kidney                                                                                                                                                                            | 2,069                   | 1.24<br>(1.20,1.30)                                 | 0.00           | 1.24<br>(1.20,1.27)     | 0.00           | 1.28<br>(1.17,1.40)      | 0.84           | 1.27<br>(1.16,1.39)     | 0.85           |
| Lung                                                                                                                                                                              | 12,894                  | 0.86<br>(0.80,0.92)                                 | 0.84           | 0.89<br>(0.85,0.94)     | 0.66           | 0.85<br>(0.79,0.92)      | 0.79           | 0.88<br>(0.83,0.93)     | 0.69           |
| Endometrial                                                                                                                                                                       | 6,138                   | 1.37<br>(1.23,1.52)                                 | 0.96           | 1.37<br>(1.25,1.52)     | 0.94           | 1.34<br>(1.19,1.50)      | 0.95           | 1.36<br>(1.19,1.56)     | 0.96           |
| Ovarian                                                                                                                                                                           | 4,092                   | 1.03<br>(0.93,1.14)                                 | 0.69           | 1.05<br>(0.95,1.16)     | 0.68           | 1.00<br>(0.91,1.10)      | 0.75           | 1.02<br>(0.93,1.12)     | 0.70           |
| Post-menopausal breast cancer                                                                                                                                                     | 25,512                  | 1.02<br>(0.99,1.05)                                 | 0.24           | 1.04<br>(0.99,1.09)     | 0.54           | 1.05<br>(1.01,1.10)      | 0.67           | 1.07<br>(1.02,1.12)     | 0.74           |
| *Multivariable adjusted models: baseline age, ethnicity, alcohol, smoking, HRT.                                                                                                   |                         |                                                     |                |                         |                |                          |                |                         |                |
| † The sum of OBR and NOR cancer does not equal total cancers as non-melanoma skin cancers were excluded in the EPIC cohort analyses.                                              |                         |                                                     |                |                         |                |                          |                |                         |                |
| <b>Abbreviations:</b> OBR, obesity-related; NOR, non-obesity-related; CI, confidence interval; HR, hazard ratio; BMI, body mass index; MV, multivariable; SD, standard deviation. |                         |                                                     |                |                         |                |                          |                |                         |                |

**Table S28: Hazard ratios of cancers per standard deviation overweight degree and duration, ABACus 2 Consortium.**

| Outcomes                                                                                                                                                                                                                                                                                                                                                                                                                                                                                                                                                                                                                                   | Number of cancer events | Degree of Overweight (per SD) |                |                         |                | Duration of Overweight (per SD) |                |                         |                |
|--------------------------------------------------------------------------------------------------------------------------------------------------------------------------------------------------------------------------------------------------------------------------------------------------------------------------------------------------------------------------------------------------------------------------------------------------------------------------------------------------------------------------------------------------------------------------------------------------------------------------------------------|-------------------------|-------------------------------|----------------|-------------------------|----------------|---------------------------------|----------------|-------------------------|----------------|
|                                                                                                                                                                                                                                                                                                                                                                                                                                                                                                                                                                                                                                            |                         | Age-adjusted HR (95% CI)      | I <sup>2</sup> | MV-adjusted HR (95% CI) | I <sup>2</sup> | Age-adjusted HR (95% CI)        | I <sup>2</sup> | MV-adjusted HR (95% CI) | I <sup>2</sup> |
| <b>Men</b>                                                                                                                                                                                                                                                                                                                                                                                                                                                                                                                                                                                                                                 |                         |                               |                |                         |                |                                 |                |                         |                |
| †Total Cancers                                                                                                                                                                                                                                                                                                                                                                                                                                                                                                                                                                                                                             | 130,704                 | 1.03 (0.99,1.06)              | 0.51           | 1.03 (1.1,0.7)          | 0.49           | 1 (0.97,1.04)                   | 0.59           | 1 (0.96,1.03)           | 0.00           |
| OBR-cancers                                                                                                                                                                                                                                                                                                                                                                                                                                                                                                                                                                                                                                | 23,060                  | 1.07 (1.04,1.11)              | 0.00           | 1.08 (1.05,1.12)        | 0.00           | 1.04 (1.1,0.8)                  | 0.17           | 1.02 (0.94,1.11)        | 0.00           |
| NOR-cancers                                                                                                                                                                                                                                                                                                                                                                                                                                                                                                                                                                                                                                | 72,342                  | 1.00 (0.97,1.03)              | 0.19           | 1.00 (0.97,1.03)        | 0.15           | 0.99 (0.96,1.02)                | 0.44           | 0.99 (0.95,1.02)        | 0.00           |
| NOR-cancers excluding lung and prostate                                                                                                                                                                                                                                                                                                                                                                                                                                                                                                                                                                                                    | 9,663                   | 1.03 (0.96,1.11)              | 0.24           | 1.05 (0.97,1.13)        | 0.30           | 1.01 (0.91,1.14)                | 0.69           | 0.99 (0.88,1.11)        | 0.00           |
| <b>Specific cancer sites</b>                                                                                                                                                                                                                                                                                                                                                                                                                                                                                                                                                                                                               |                         |                               |                |                         |                |                                 |                |                         |                |
| Colorectal                                                                                                                                                                                                                                                                                                                                                                                                                                                                                                                                                                                                                                 | 11,063                  | 1.09 (0.96,1.24)              | 0.62           | 1.09 (0.97,1.23)        | 0.57           | 1.01 (0.98,1.05)                | 0.00           | 1.04 (0.96,1.12)        | 0.00           |
| Pancreas                                                                                                                                                                                                                                                                                                                                                                                                                                                                                                                                                                                                                                   | 3,351                   | 1.09 (0.98,1.21)              | 0.07           | 1.08 (0.97,1.21)        | 0.15           | 1.06 (0.98,1.14)                | 0.00           | 1.01 (0.87,1.16)        | 0.00           |
| Kidney                                                                                                                                                                                                                                                                                                                                                                                                                                                                                                                                                                                                                                     | 3,398                   | 1.02 (0.92,1.13)              | 0.00           | 1.02 (0.92,1.14)        | 0.00           | 1.10 (1.1,1.21)                 | 0.24           | 0.96 (0.74,1.27)        | 0.00           |
| Bladder                                                                                                                                                                                                                                                                                                                                                                                                                                                                                                                                                                                                                                    | 2,787                   | 1.04 (0.98,1.1)               | 0.00           | 1.06 (1.1,1.12)         | 0.00           | 0.99 (0.87,1.13)                | 0.58           | 0.99 (0.86,1.13)        | 0.00           |
| Lung                                                                                                                                                                                                                                                                                                                                                                                                                                                                                                                                                                                                                                       | 14,545                  | 1.10 (0.99,1.22)              | 0.49           | 1.13 (1.08,1.19)        | 0.00           | 0.98 (0.93,1.04)                | 0.25           | 0.98 (0.89,1.08)        | 0.00           |
| Prostate                                                                                                                                                                                                                                                                                                                                                                                                                                                                                                                                                                                                                                   | 48,116                  | 0.96 (0.92,1.02)              | 0.51           | 0.96 (0.92,1)           | 0.29           | 0.98 (0.96,1.00)                | 0.00           | 0.99 (0.94,1.04)        | 0.00           |
| <b>Women</b>                                                                                                                                                                                                                                                                                                                                                                                                                                                                                                                                                                                                                               |                         |                               |                |                         |                |                                 |                |                         |                |
| †Total Cancers                                                                                                                                                                                                                                                                                                                                                                                                                                                                                                                                                                                                                             | 98,690                  | 1.03 (0.99,1.07)              | 0.71           | 1.04 (1.00,1.07)        | 0.68           | 1.02 (1.00,1.04)                | 0.43           | 1.03 (1.01,1.04)        | 0.17           |
| OBR-cancers                                                                                                                                                                                                                                                                                                                                                                                                                                                                                                                                                                                                                                | 55,712                  | 1.03 (0.99,1.08)              | 0.76           | 1.04 (0.99,1.08)        | 0.82           | 1.03 (1.00,1.06)                | 0.69           | 1.03 (1.00,1.07)        | 0.76           |
| NOR-cancers                                                                                                                                                                                                                                                                                                                                                                                                                                                                                                                                                                                                                                | 26,718                  | 1.00 (0.92,1.07)              | 0.79           | 1.01 (0.94,1.09)        | 0.78           | 0.99 (0.91,1.09)                | 0.86           | 1.01 (0.92,1.11)        | 0.87           |
| NOR-cancers excluding lung                                                                                                                                                                                                                                                                                                                                                                                                                                                                                                                                                                                                                 | 13,736                  | 1.01 (0.93,1.10)              | 0.64           | 1.02 (0.93,1.11)        | 0.72           | 1.02 (0.93,1.11)                | 0.73           | 1.02 (0.94,1.11)        | 0.68           |
| <b>Specific cancer sites</b>                                                                                                                                                                                                                                                                                                                                                                                                                                                                                                                                                                                                               |                         |                               |                |                         |                |                                 |                |                         |                |
| Colorectal                                                                                                                                                                                                                                                                                                                                                                                                                                                                                                                                                                                                                                 | 10,026                  | 1.04 (1.02,1.07)              | 0.00           | 1.04 (1.02,1.07)        | 0.00           | 1.06 (1.03,1.10)                | 0.00           | 1.06 (1.02,1.10)        | 0.01           |
| Pancreas                                                                                                                                                                                                                                                                                                                                                                                                                                                                                                                                                                                                                                   | 3,172                   | 1.03 (0.93,1.13)              | 0.40           | 1.03 (0.93,1.14)        | 0.46           | 1.10 (1.01,1.21)                | 0.31           | 1.11 (1.02,1.20)        | 0.21           |
| Kidney                                                                                                                                                                                                                                                                                                                                                                                                                                                                                                                                                                                                                                     | 2,069                   | 1.06 (0.96,1.17)              | 0.40           | 1.07 (0.98,1.17)        | 0.30           | 1.16 (1.03,1.3)                 | 0.5            | 1.15 (1.03,1.28)        | 0.4            |
| Lung                                                                                                                                                                                                                                                                                                                                                                                                                                                                                                                                                                                                                                       | 12,894                  | 0.96 (0.90,1.03)              | 0.56           | 0.99 (0.93,1.05)        | 0.50           | 0.96 (0.88,1.06)                | 0.78           | 0.99 (0.89,1.11)        | 0.83           |
| Endometrial                                                                                                                                                                                                                                                                                                                                                                                                                                                                                                                                                                                                                                | 6,138                   | 1.15 (1.01,1.3)               | 0.86           | 1.14 (1.01,1.29)        | 0.85           | 1.11 (0.90,1.37)                | 0.95           | 1.10 (0.90,1.36)        | 0.95           |
| Ovarian                                                                                                                                                                                                                                                                                                                                                                                                                                                                                                                                                                                                                                    | 4,092                   | 1.09 (1.03,1.15)              | 0.00           | 1.09 (1.03,1.15)        | 0.00           | 1.02 (0.93,1.12)                | 0.42           | 1.02 (0.92,1.12)        | 0.47           |
| Post-menopausal breast cancer                                                                                                                                                                                                                                                                                                                                                                                                                                                                                                                                                                                                              | 25,512                  | 0.97 (0.91,1.04)              | 0.84           | 0.98 (0.92,1.05)        | 0.87           | 0.99 (0.94,1.03)                | 0.73           | 1.00 (0.95,1.05)        | 0.83           |
| <p>*Multivariable adjusted models: baseline age, ethnicity, alcohol, smoking, HRT.<br/> † The sum of OBR and NOR cancer does not equal total cancers as non-melanoma skin cancers were excluded in the EPIC cohort analyses.<br/> Degree of overweight is the cumulative sum of the number of BMI units <math>\geq 25</math> kg/m<sup>2</sup><br/> Duration of overweight is the cumulative sum of the duration overweight (BMI <math>\geq 25</math> kg/m<sup>2</sup>).<br/> <b>Abbreviations:</b> OBR, obesity-related; NOR, non-obesity-related; CI, confidence interval; HR, hazard ratio; BMI, body mass index; MV, multivariable.</p> |                         |                               |                |                         |                |                                 |                |                         |                |

**Table S29: Comparison of the overweight degree and duration per 10 units and per 10 years respectively, ABACus 2 Consortium.**

| Outcomes                                                                                                                                                                                                                                                                                                                                                                                                                                                                                                                                                                                                                                                           | Number of cancer events | Degree of Overweight (per 10 units) |                |                         |                | Duration of Overweight (per 10 years) |                |                         |                |
|--------------------------------------------------------------------------------------------------------------------------------------------------------------------------------------------------------------------------------------------------------------------------------------------------------------------------------------------------------------------------------------------------------------------------------------------------------------------------------------------------------------------------------------------------------------------------------------------------------------------------------------------------------------------|-------------------------|-------------------------------------|----------------|-------------------------|----------------|---------------------------------------|----------------|-------------------------|----------------|
|                                                                                                                                                                                                                                                                                                                                                                                                                                                                                                                                                                                                                                                                    |                         | Age-adjusted HR (95% CI)            | I <sup>2</sup> | MV-adjusted HR (95% CI) | I <sup>2</sup> | Age-adjusted HR (95% CI)              | I <sup>2</sup> | MV-adjusted HR (95% CI) | I <sup>2</sup> |
| <b>Men</b>                                                                                                                                                                                                                                                                                                                                                                                                                                                                                                                                                                                                                                                         |                         |                                     |                |                         |                |                                       |                |                         |                |
| †Total Cancers                                                                                                                                                                                                                                                                                                                                                                                                                                                                                                                                                                                                                                                     | 130,704                 | 1.00 (1.00,1.01)                    | 0.94           | 1.00 (1.00,1.01)        | 0.94           | 1.00 (0.99,1.02)                      | 0.29           | 1.00 (0.99,1.02)        | 0.28           |
| OBR-cancers                                                                                                                                                                                                                                                                                                                                                                                                                                                                                                                                                                                                                                                        | 23,060                  | 1.01 (1.00,1.03)                    | 0.82           | 1.01 (1.00,1.03)        | 0.82           | 1.04 (0.89,1.22)                      | 0.91           | 1.04 (0.92,1.18)        | 0.87           |
| NOR-cancers                                                                                                                                                                                                                                                                                                                                                                                                                                                                                                                                                                                                                                                        | 72,342                  | 1.00 (1.00,1.00)                    | 0.00           | 1.00 (1.00,1.00)        | 0.00           | 0.99 (0.97,1.00)                      | 0.00           | 0.98 (0.95,1.01)        | 0.58           |
| NOR-cancers excluding lung and prostate                                                                                                                                                                                                                                                                                                                                                                                                                                                                                                                                                                                                                            | 9,663                   | 1.01 (0.98,1.03)                    | 0.51           | 1.01 (0.98,1.03)        | 0.51           | 1.01 (0.92,1.12)                      | 0.49           | 1.01 (0.93,1.11)        | 0.48           |
| <b>Specific cancer sites</b>                                                                                                                                                                                                                                                                                                                                                                                                                                                                                                                                                                                                                                       |                         |                                     |                |                         |                |                                       |                |                         |                |
| Colorectal                                                                                                                                                                                                                                                                                                                                                                                                                                                                                                                                                                                                                                                         | 11,063                  | 1.02 (0.99,1.05)                    | 0.80           | 1.02 (0.99,1.05)        | 0.80           | 1.04 (0.95,1.14)                      | 0.77           | 1.04 (0.95,1.14)        | 0.76           |
| Pancreas                                                                                                                                                                                                                                                                                                                                                                                                                                                                                                                                                                                                                                                           | 3,351                   | 1.01 (0.99,1.04)                    | 0.47           | 1.01 (0.99,1.04)        | 0.46           | 1.04 (0.98,1.11)                      | 0.00           | 1.04 (0.99,1.11)        | 0.00           |
| Kidney                                                                                                                                                                                                                                                                                                                                                                                                                                                                                                                                                                                                                                                             | 3,398                   | 1.02 (0.98,1.06)                    | 0.72           | 1.02 (0.98,1.06)        | 0.72           | 1.08 (0.78,1.50)                      | 0.71           | 1.08 (0.78,1.49)        | 0.69           |
| Bladder                                                                                                                                                                                                                                                                                                                                                                                                                                                                                                                                                                                                                                                            | 2,787                   | 1.01 (1.01,1.02)                    | 0.00           | 1.01 (0.99,1.02)        | 0.05           | 1.01 (0.93,1.11)                      | 0.42           | 1.01 (0.91,1.12)        | 0.57           |
| Lung                                                                                                                                                                                                                                                                                                                                                                                                                                                                                                                                                                                                                                                               | 14,545                  | 1.00 (0.97,1.03)                    | 0.84           | 1.01 (0.95,1.07)        | 0.96           | 0.94 (0.84,1.06)                      | 0.86           | 0.95 (0.81,1.12)        | 0.93           |
| Prostate                                                                                                                                                                                                                                                                                                                                                                                                                                                                                                                                                                                                                                                           | 48,116                  | 1.00 (1.00,1.00)                    | 0.00           | 1.00 (1.00,1.00)        | 0.00           | 0.99 (0.98,1.00)                      | 0.00           | 0.99 (0.98,1.01)        | 0.00           |
| <b>Women</b>                                                                                                                                                                                                                                                                                                                                                                                                                                                                                                                                                                                                                                                       |                         |                                     |                |                         |                |                                       |                |                         |                |
| †Total Cancers                                                                                                                                                                                                                                                                                                                                                                                                                                                                                                                                                                                                                                                     | 98,690                  | 1.00 (1.00,1.01)                    | 0.95           | 1.00 (1.00,1.01)        | 0.95           | 1.01 (1.00,1.03)                      | 0.16           | 1.02 (1.00,1.03)        | 0.55           |
| OBR-cancers                                                                                                                                                                                                                                                                                                                                                                                                                                                                                                                                                                                                                                                        | 55,712                  | 1.00 (0.99,1.01)                    | 0.92           | 1.00 (0.99,1.01)        | 0.92           | 1.02 (1.00,1.05)                      | 0.66           | 1.03 (1.00,1.06)        | 0.81           |
| NOR-cancers                                                                                                                                                                                                                                                                                                                                                                                                                                                                                                                                                                                                                                                        | 26,718                  | 1.00 (0.98,1.01)                    | 0.86           | 1.00 (0.98,1.01)        | 0.86           | 0.99 (0.90,1.08)                      | 0.90           | 0.99 (0.90,1.09)        | 0.90           |
| NOR-cancers excluding lung                                                                                                                                                                                                                                                                                                                                                                                                                                                                                                                                                                                                                                         | 13,736                  | 1.00 (0.98,1.02)                    | 0.81           | 1.00 (0.98,1.02)        | 0.81           | 1.00 (0.92,1.08)                      | 0.76           | 1.00 (0.93,1.08)        | 0.69           |
| Colorectal                                                                                                                                                                                                                                                                                                                                                                                                                                                                                                                                                                                                                                                         | 10,026                  | 1.00 (0.99,1.01)                    | 0.64           | 1.00 (0.99,1.01)        | 0.64           | 1.04 (1.02,1.07)                      | 0.00           | 1.04 (1.02,1.06)        | 0.00           |
| Pancreas                                                                                                                                                                                                                                                                                                                                                                                                                                                                                                                                                                                                                                                           | 3,172                   | 1.01 (0.99,1.03)                    | 0.60           | 1.01 (0.99,1.03)        | 0.6            | 1.07 (0.97,1.18)                      | 0.55           | 1.07 (0.98,1.17)        | 0.47           |
| Kidney                                                                                                                                                                                                                                                                                                                                                                                                                                                                                                                                                                                                                                                             | 2,069                   | 1.01 (0.99,1.02)                    | 0.51           | 1.01 (1.00,1.02)        | 0.49           | 1.11 (0.98,1.25)                      | 0.71           | 1.11 (0.99,1.24)        | 0.68           |
| Lung                                                                                                                                                                                                                                                                                                                                                                                                                                                                                                                                                                                                                                                               | 12,894                  | 1.00 (0.99,1.00)                    | 0.00           | 1.00 (0.99,1.01)        | 0.76           | 0.97 (0.88,1.06)                      | 0.83           | 0.98 (0.90,1.07)        | 0.83           |
| Endometrial                                                                                                                                                                                                                                                                                                                                                                                                                                                                                                                                                                                                                                                        | 6,138                   | 1.02 (0.99,1.05)                    | 0.95           | 1.02 (0.99,1.05)        | 0.94           | 1.11 (0.92,1.34)                      | 0.97           | 1.11 (0.92,1.34)        | 0.97           |
| Ovarian                                                                                                                                                                                                                                                                                                                                                                                                                                                                                                                                                                                                                                                            | 4,092                   | 1.01 (1.00,1.02)                    | 0.00           | 1.01 (1.00,1.02)        | 0.58           | 1.03 (0.97,1.09)                      | 0.27           | 1.03 (0.97,1.09)        | 0.27           |
| Post-menopausal breast cancer                                                                                                                                                                                                                                                                                                                                                                                                                                                                                                                                                                                                                                      | 25,512                  | 1.00 (0.99,1.01)                    | 0.82           | 1.00 (0.98,1.02)        | 0.95           | 0.99 (0.94,1.05)                      | 0.85           | 1.00 (0.95,1.06)        | 0.84           |
| <p>*Multivariable adjusted models: baseline age, ethnicity, alcohol, smoking, HRT.<br/>         † The sum of OBR and NOR cancer does not equal total cancers as non-melanoma skin cancers were excluded in the EPIC cohort analyses.<br/>         Degree of overweight is the cumulative sum of the number of BMI units <math>\geq 25</math> kg/m<sup>2</sup><br/>         Duration of overweight is the cumulative sum of the duration overweight (BMI <math>\geq 25</math> kg/m<sup>2</sup>).<br/> <b>Abbreviations:</b> OBR, obesity-related; NOR, non-obesity-related; CI, confidence interval; HR, hazard ratio; BMI, body mass index; MV, multivariable.</p> |                         |                                     |                |                         |                |                                       |                |                         |                |

**Table S30: Comparison of Harrell’s C-statistic of the metrics, ABACus 2 Consortium**

| Characteristic                          | Harrell’s C-statistic (95% CI) |                         |                                                            |                           |                                                                                              |                                                                              |                         |                         |                                                                     |
|-----------------------------------------|--------------------------------|-------------------------|------------------------------------------------------------|---------------------------|----------------------------------------------------------------------------------------------|------------------------------------------------------------------------------|-------------------------|-------------------------|---------------------------------------------------------------------|
|                                         | Overweight-years               | BMI                     | Difference in c-statistic between BMI and overweight-years | Overweight-years with BMI | Difference in c-statistic: overweight-years with BMI combined compared with overweight-years | Difference in c-statistic between overweight-years with BMI combined and BMI | Degree of overweight    | Duration of overweight  | Difference in c-statistic between duration and degree of overweight |
| <b>Men</b>                              |                                |                         |                                                            |                           |                                                                                              |                                                                              |                         |                         |                                                                     |
| Total Cancers                           | 0.596<br>(0.559, 0.632)        | 0.596<br>(0.559, 0.631) | -0.001<br>(-0.004, 0.002)                                  | 0.592<br>(0.546, 0.637)   | 0.000<br>(-0.002, 0.003)                                                                     | 0.001<br>(-0.002, 0.004)                                                     | 0.596<br>(0.560, 0.631) | 0.596<br>(0.559, 0.631) | -0.001<br>(-0.004, 0.002)                                           |
| OBR-cancers                             | 0.619<br>(0.554, 0.680)        | 0.619<br>(0.555, 0.679) | 0.000<br>(-0.004, 0.004)                                   | 0.619<br>(0.555, 0.680)   | 0.002<br>(-0.001, 0.005)                                                                     | 0.000<br>(-0.000, 0.001)                                                     | 0.603<br>(0.583, 0.622) | 0.617<br>(0.551, 0.678) | -0.001<br>(-0.004, 0.003)                                           |
| NOR-cancers                             | 0.609<br>(0.553, 0.663)        | 0.609<br>(0.551, 0.664) | 0.001<br>(-0.003, 0.004)                                   | 0.617<br>(0.560, 0.672)   | 0.001<br>(-0.001, 0.002)                                                                     | -0.000<br>(-0.003, 0.003)                                                    | 0.609<br>(0.552, 0.663) | 0.608<br>(0.550, 0.664) | 0.000<br>(-0.003, 0.003)                                            |
| NOR-cancers excluding lung and prostate | 0.621<br>(0.545, 0.692)        | 0.621<br>(0.544, 0.692) | 0.000<br>(-0.002, 0.002)                                   | 0.622<br>(0.545, 0.693)   | -0.000<br>(-0.001, 0.001)                                                                    | 0.000<br>(-0.002, 0.002)                                                     | 0.621<br>(0.544, 0.692) | 0.621<br>(0.547, 0.690) | 0.000<br>(-0.001, 0.001)                                            |
| <b>Specific cancer sites</b>            |                                |                         |                                                            |                           |                                                                                              |                                                                              |                         |                         |                                                                     |
| Colorectal                              | 0.633<br>(0.583, 0.679)        | 0.627<br>(0.579, 0.673) | 0.001<br>(-0.002, 0.003)                                   | 0.633<br>(0.593, 0.672)   | 0.001<br>(-0.002, 0.004)                                                                     | 0.001<br>(-0.001, 0.003)                                                     | 0.630<br>(0.587, 0.670) | 0.629<br>(0.585, 0.671) | -0.000<br>(-0.003, 0.003)                                           |
| Pancreas                                | 0.608<br>(0.549, 0.664)        | 0.608<br>(0.551, 0.662) | -0.001<br>(-0.003, 0.002)                                  | 0.613<br>(0.568, 0.656)   | -0.001<br>(-0.001, 0.004)                                                                    | 0.002<br>(-0.002, 0.006)                                                     | 0.608<br>(0.548, 0.665) | 0.607<br>(0.548, 0.663) | 0.001<br>(-0.002, 0.003)                                            |
| Kidney                                  | 0.588<br>(0.564, 0.612)        | 0.592<br>(0.564, 0.618) | 0.003<br>(-0.003, 0.009)                                   | 0.594<br>(0.569, 0.617)   | 0.004<br>(-0.002, 0.009)                                                                     | 0.001<br>(-0.002, 0.004)                                                     | 0.587<br>(0.565, 0.610) | 0.590<br>(0.569, 0.611) | 0.004<br>(-0.002, 0.010)                                            |
| Bladder                                 | 0.675<br>(0.625, 0.722)        | 0.675<br>(0.624, 0.722) | 0.000<br>(-0.002, 0.002)                                   | 0.679<br>(0.630, 0.725)   | -0.000<br>(-0.002, 0.001)                                                                    | -0.000<br>(-0.001, 0.001)                                                    | 0.674<br>(0.622, 0.722) | 0.674<br>(0.624, 0.720) | 0.000<br>(-0.001, 0.001)                                            |
| Lung                                    | 0.721<br>(0.692, 0.748)        | 0.725<br>(0.694, 0.755) | 0.005<br>(0.000, 0.010)                                    | 0.726<br>(0.692, 0.758)   | 0.005<br>(0.001, 0.009)                                                                      | 0.001<br>(-0.001, 0.004)                                                     | 0.721<br>(0.694, 0.747) | 0.724<br>(0.698, 0.750) | 0.001<br>(-0.002, 0.004)                                            |
| Prostate                                | 0.615<br>(0.561, 0.666)        | 0.607<br>(0.553, 0.658) | -0.001<br>(-0.005, 0.003)                                  | 0.608<br>(0.535, 0.676)   | -0.000<br>(-0.004, 0.003)                                                                    | 0.000<br>(-0.003, 0.004)                                                     | 0.606<br>(0.550, 0.661) | 0.604<br>(0.547, 0.658) | -0.002<br>(-0.006, 0.002)                                           |
| <b>Women</b>                            |                                |                         |                                                            |                           |                                                                                              |                                                                              |                         |                         |                                                                     |
| Total Cancers                           | 0.580<br>(0.559, 0.600)        | 0.578<br>(0.556, 0.599) | 0.000<br>(-0.004, 0.004)                                   | 0.575<br>(0.549, 0.601)   | -0.001<br>(-0.005, 0.004)                                                                    | -0.001<br>(-0.005, 0.004)                                                    | 0.575<br>(0.556, 0.595) | 0.575<br>(0.559, 0.591) | -0.001<br>(-0.005, 0.003)                                           |
| OBR-cancers                             | 0.561<br>(0.538, 0.584)        | 0.565<br>(0.543, 0.587) | 0.003<br>(-0.001, 0.006)                                   | 0.568<br>(0.546, 0.590)   | 0.002<br>(0.000, 0.004)                                                                      | 0.000<br>(-0.004, 0.005)                                                     | 0.562<br>(0.538, 0.585) | 0.567<br>(0.547, 0.587) | -0.000<br>(-0.001, 0.000)                                           |
| NOR-cancers                             | 0.644<br>(0.592, 0.693)        | 0.645<br>(0.591, 0.695) | 0.001<br>(-0.002, 0.005)                                   | 0.643<br>(0.590, 0.693)   | 0.001<br>(-0.002, 0.006)                                                                     | 0.001<br>(-0.001, 0.003)                                                     | 0.644<br>(0.590, 0.694) | 0.645<br>(0.591, 0.695) | 0.001<br>(0.000, 0.002)                                             |
| NOR-cancers excluding lung              | 0.597<br>(0.551, 0.642)        | 0.599<br>(0.552, 0.644) | 0.000<br>(-0.003, 0.003)                                   | 0.602<br>(0.559, 0.643)   | 0.000<br>(-0.003, 0.003)                                                                     | -0.000<br>(-0.003, 0.002)                                                    | 0.598<br>(0.551, 0.642) | 0.597<br>(0.550, 0.642) | -0.001<br>(-0.003, 0.001)                                           |
| <b>Specific cancer sites</b>            |                                |                         |                                                            |                           |                                                                                              |                                                                              |                         |                         |                                                                     |
| Colorectal                              | 0.625<br>(0.586, 0.662)        | 0.628<br>(0.594, 0.660) | 0.002<br>(-0.002, 0.007)                                   | 0.611<br>(0.556, 0.663)   | 0.002<br>(-0.002, 0.005)                                                                     | -0.000<br>(-0.005, 0.004)                                                    | 0.625<br>(0.587, 0.662) | 0.626<br>(0.591, 0.660) | 0.001<br>(-0.004, 0.007)                                            |
| Pancreas                                | 0.636<br>(0.588, 0.681)        | 0.635<br>(0.588, 0.681) | 0.001<br>(-0.001, 0.004)                                   | 0.639<br>(0.590, 0.685)   | 0.002<br>(-0.001, 0.004)                                                                     | 0.000<br>(-0.001, 0.001)                                                     | 0.637<br>(0.589, 0.681) | 0.634<br>(0.588, 0.677) | -0.001<br>(-0.004, 0.002)                                           |
| Kidney                                  | 0.609<br>(0.594, 0.625)        | 0.623<br>(0.604, 0.642) | 0.012<br>(0.003, 0.021)                                    | 0.624<br>(0.599, 0.648)   | 0.010<br>(0.003, 0.018)                                                                      | -0.001<br>(-0.003, 0.001)                                                    | 0.610<br>(0.595, 0.625) | 0.622<br>(0.604, 0.640) | 0.011<br>(-0.000, 0.023)                                            |
| Lung                                    | 0.740<br>(0.708, 0.770)        | 0.743<br>(0.709, 0.773) | 0.003<br>(-0.000, 0.006)                                   | 0.742<br>(0.711, 0.771)   | 0.002<br>(-0.002, 0.007)                                                                     | 0.001<br>(-0.001, 0.002)                                                     | 0.740<br>(0.710, 0.769) | 0.742<br>(0.711, 0.771) | 0.001<br>(-0.001, 0.002)                                            |
| Endometrial                             | 0.608<br>(0.561, 0.652)        | 0.614<br>(0.557, 0.668) | 0.008<br>(-0.004, 0.020)                                   | 0.621<br>(0.565, 0.675)   | 0.011<br>(0.000, 0.022)                                                                      | 0.000<br>(-0.007, 0.007)                                                     | 0.592<br>(0.562, 0.623) | 0.588<br>(0.552, 0.622) | -0.006<br>(-0.019, 0.007)                                           |
| Ovarian                                 | 0.558<br>(0.529, 0.587)        | 0.559<br>(0.532, 0.585) | 0.001<br>(-0.003, 0.005)                                   | 0.561<br>(0.533, 0.589)   | 0.001<br>(-0.002, 0.005)                                                                     | 0.001<br>(-0.003, 0.004)                                                     | 0.557<br>(0.527, 0.587) | 0.559<br>(0.529, 0.588) | -0.000<br>(-0.005, 0.005)                                           |
| Post-menopausal breast cancer           | 0.596<br>(0.512, 0.674)        | 0.599<br>(0.518, 0.675) | 0.003<br>(0.000, 0.006)                                    | 0.593<br>(0.500, 0.679)   | 0.002<br>(-0.001, 0.006)                                                                     | -0.001<br>(-0.002, 0.001)                                                    | 0.596<br>(0.513, 0.674) | 0.592<br>(0.513, 0.666) | -0.001<br>(-0.003, 0.001)                                           |

\*All models were multivariable adjusted, including baseline age, ethnicity, alcohol, smoking, HRT.  
Key: Green – significant difference in C-statistic.  
**Abbreviations:** SE, standard error; OBR, obesity-related; NOR, non-obesity-related; BMI, body mass index; CI, confidence interval; MV, multivariable-adjusted.

b) Analysis of obese-years exposure

Table S31: Hazard ratios of cancers per standard deviation obese-years and BMI, ABACus 2 Consortium.

| Outcomes                                                                                                                                                                                                                                                                                                                                                                                                                        | Number of cancer events | Obese-years (per SD)     |                |                         |                | BMI (per SD)             |                |                         |                |
|---------------------------------------------------------------------------------------------------------------------------------------------------------------------------------------------------------------------------------------------------------------------------------------------------------------------------------------------------------------------------------------------------------------------------------|-------------------------|--------------------------|----------------|-------------------------|----------------|--------------------------|----------------|-------------------------|----------------|
|                                                                                                                                                                                                                                                                                                                                                                                                                                 |                         | Age-adjusted HR (95% CI) | I <sup>2</sup> | MV-adjusted HR (95% CI) | I <sup>2</sup> | Age-adjusted HR (95% CI) | I <sup>2</sup> | MV-adjusted HR (95% CI) | I <sup>2</sup> |
| <b>Men</b>                                                                                                                                                                                                                                                                                                                                                                                                                      |                         |                          |                |                         |                |                          |                |                         |                |
| †Total Cancers                                                                                                                                                                                                                                                                                                                                                                                                                  | 130,704                 | 1.02 (0.99,1.05)         | 0.78           | 1.02 (0.98,1.06)        | 0.86           | 1.02 (0.99,1.04)         | 0.73           | 1.01 (0.98,1.04)        | 0.72           |
| OBR-cancers                                                                                                                                                                                                                                                                                                                                                                                                                     | 23,060                  | 1.09 (1.08,1.10)         | 0.00           | 1.09 (1.08,1.10)        | 0.00           | 1.17 (1.16,1.18)         | 0.00           | 1.17 (1.16,1.18)        | 0.00           |
| NOR-cancers                                                                                                                                                                                                                                                                                                                                                                                                                     | 72,342                  | 0.98 (0.94,1.03)         | 0.83           | 0.98 (0.94,1.02)        | 0.76           | 0.96 (0.94,0.99)         | 0.60           | 0.96 (0.93,0.99)        | 0.73           |
| NOR-cancers excluding lung and prostate                                                                                                                                                                                                                                                                                                                                                                                         | 9,663                   | 1.03 (0.97,1.10)         | 0.71           | 1.03 (0.97,1.10)        | 0.70           | 1.05 (1.02,1.08)         | 0.00           | 1.04 (1.01,1.07)        | 0.00           |
| <b>Specific cancer sites</b>                                                                                                                                                                                                                                                                                                                                                                                                    |                         |                          |                |                         |                |                          |                |                         |                |
| Colorectal                                                                                                                                                                                                                                                                                                                                                                                                                      | 11,063                  | 1.10 (1.00,1.20)         | 0.69           | 1.10 (1.00,1.20)        | 0.68           | 1.15 (1.11,1.19)         | 0.18           | 1.15 (1.11,1.19)        | 0.32           |
| Pancreas                                                                                                                                                                                                                                                                                                                                                                                                                        | 3,351                   | 1.06 (1.01,1.11)         | 0.05           | 1.06 (1.01,1.11)        | 0.04           | 1.09 (1.03,1.15)         | 0.10           | 1.10 (1.04,1.16)        | 0.03           |
| Kidney                                                                                                                                                                                                                                                                                                                                                                                                                          | 3,398                   | 1.11 (1.08,1.14)         | 0.00           | 1.11 (1.08,1.15)        | 0.00           | 1.24 (1.13,1.35)         | 0.44           | 1.23 (1.13,1.34)        | 0.42           |
| Bladder                                                                                                                                                                                                                                                                                                                                                                                                                         | 2,787                   | 1.06 (0.97,1.15)         | 0.42           | 1.06 (0.97,1.16)        | 0.43           | 1.08 (1.01,1.16)         | 0.00           | 1.07 (0.99,1.15)        | 0.00           |
| Lung                                                                                                                                                                                                                                                                                                                                                                                                                            | 14,545                  | 0.98 (0.95,1.01)         | 0.11           | 0.97 (0.94,1.01)        | 0.14           | 0.86 (0.75,0.99)         | 0.9            | 0.84 (0.75,0.94)        | 0.90           |
| Prostate                                                                                                                                                                                                                                                                                                                                                                                                                        | 48,116                  | 0.97 (0.93,1.01)         | 0.64           | 0.96 (0.92,1.00)        | 0.58           | 0.97 (0.91,1.04)         | 0.89           | 0.97 (0.92,1.02)        | 0.80           |
| <b>Women</b>                                                                                                                                                                                                                                                                                                                                                                                                                    |                         |                          |                |                         |                |                          |                |                         |                |
| †Total Cancers                                                                                                                                                                                                                                                                                                                                                                                                                  | 98,690                  | 1.04 (1.03,1.05)         | 0.20           | 1.04 (1.02,1.06)        | 0.51           | 1.05 (1.01,1.08)         | 0.77           | 1.06 (1.02,1.10)        | 0.80           |
| OBR-cancers                                                                                                                                                                                                                                                                                                                                                                                                                     | 55,712                  | 1.07 (1.03,1.10)         | 0.85           | 1.07 (1.04,1.10)        | 0.80           | 1.11 (1.08,1.14)         | 0.76           | 1.12 (1.08,1.16)        | 0.86           |
| NOR-cancers                                                                                                                                                                                                                                                                                                                                                                                                                     | 26,718                  | 0.96 (0.92,1.00)         | 0.74           | 0.97 (0.93,1.02)        | 0.73           | 0.91 (0.83,1.01)         | 0.94           | 0.94 (0.84,1.05)        | 0.93           |
| NOR-cancers excluding lung                                                                                                                                                                                                                                                                                                                                                                                                      | 13,736                  | 1.01 (0.97,1.04)         | 0.25           | 1.02 (1.00,1.04)        | 0.00           | 0.99 (0.90,1.09)         | 0.80           | 1.01 (0.91,1.13)        | 0.79           |
| <b>Specific cancer sites</b>                                                                                                                                                                                                                                                                                                                                                                                                    |                         |                          |                |                         |                |                          |                |                         |                |
| Colorectal                                                                                                                                                                                                                                                                                                                                                                                                                      | 10,026                  | 1.06 (1.05,1.08)         | 0.00           | 1.06 (1.04,1.07)        | 0.00           | 1.09 (1.05,1.14)         | 0.38           | 1.08 (1.05,1.12)        | 0.15           |
| Pancreas                                                                                                                                                                                                                                                                                                                                                                                                                        | 3,172                   | 1.01 (0.89,1.15)         | 0.63           | 1.00 (0.93,1.07)        | 0.42           | 1.01 (0.96,1.07)         | 0.08           | 1.01 (0.98,1.05)        | 0.00           |
| Kidney                                                                                                                                                                                                                                                                                                                                                                                                                          | 2,069                   | 1.15 (1.09,1.21)         | 0.27           | 1.14 (1.08,1.20)        | 0.30           | 1.31 (1.18,1.45)         | 0.84           | 1.30 (1.18,1.44)        | 0.84           |
| Lung                                                                                                                                                                                                                                                                                                                                                                                                                            | 12,894                  | 0.89 (0.85,0.93)         | 0.28           | 0.91 (0.88,0.94)        | 0.12           | 0.84 (0.80,0.89)         | 0.66           | 0.87 (0.83,0.90)        | 0.41           |
| Endometrial                                                                                                                                                                                                                                                                                                                                                                                                                     | 6,138                   | 1.20 (1.14,1.27)         | 0.86           | 1.20 (1.14,1.27)        | 0.81           | 1.36 (1.21,1.53)         | 0.93           | 1.40 (1.21,1.62)        | 0.94           |
| Ovarian                                                                                                                                                                                                                                                                                                                                                                                                                         | 4,092                   | 1.01 (0.97,1.05)         | 0.00           | 1.02 (0.97,1.07)        | 0.18           | 1.00 (0.91,1.1)          | 0.77           | 1.02 (0.93,1.12)        | 0.72           |
| Post-menopausal breast cancer                                                                                                                                                                                                                                                                                                                                                                                                   | 25,512                  | 1.01 (0.98,1.03)         | 0.30           | 1.01 (0.99,1.04)        | 0.36           | 1.05 (1.01,1.09)         | 0.62           | 1.07 (1.02,1.12)        | 0.72           |
| <p>*Multivariable adjusted models: baseline age, ethnicity, alcohol, smoking, HRT.<br/>         † The sum of OBR and NOR cancer does not equal total cancers as non-melanoma skin cancers were excluded in the EPIC cohort analyses.<br/> <b>Abbreviations:</b> OBR, obesity-related; NOR, non-obesity-related; CI, confidence interval; HR, hazard ratio; BMI, body mass index; MV, multivariable; SD, standard deviation.</p> |                         |                          |                |                         |                |                          |                |                         |                |



**Table S32: Hazard ratios of cancers per 100 obese-years and per 5-unit BMI, ABACus 2 Consortium.**

| Outcomes                                | Number of cancer events | Obese-years (per 100 kg-years/m <sup>2</sup> ) |                |                         |                | BMI (per 5 units)        |                |                         |                |
|-----------------------------------------|-------------------------|------------------------------------------------|----------------|-------------------------|----------------|--------------------------|----------------|-------------------------|----------------|
|                                         |                         | Age-adjusted HR (95% CI)                       | I <sup>2</sup> | MV-adjusted HR (95% CI) | I <sup>2</sup> | Age-adjusted HR (95% CI) | I <sup>2</sup> | MV-adjusted HR (95% CI) | I <sup>2</sup> |
| <b>Men</b>                              |                         |                                                |                |                         |                |                          |                |                         |                |
| †Total Cancers                          | 130,704                 | 1.09<br>(0.95,1.26)                            | 0.84           | 1.09 (0.94,1.26)        | 0.85           | 1.02<br>(0.99,1.05)      | 0.67           | 1.01<br>(0.98,1.05)     | 0.68           |
| OBR-cancers                             | 23,060                  | 1.37<br>(1.25,1.50)                            | 0.29           | 1.37 (1.25,1.50)        | 0.25           | 1.20<br>(1.19,1.21)      | 0.00           | 1.20<br>(1.19,1.21)     | 0.00           |
| NOR-cancers                             | 72,342                  | 0.90<br>(0.80,1.01)                            | 0.47           | 0.89 (0.79,1.00)        | 0.47           | 0.95<br>(0.89,1.02)      | 0.86           | 0.95<br>(0.89,1.01)     | 0.71           |
| NOR-cancers excluding lung and prostate | 9,663                   | 1.04<br>(0.93,1.17)                            | 0.00           | 1.04 (0.91,1.19)        | 0.00           | 1.05 (1.01,1.1)          | 0.00           | 1.04<br>(0.98,1.11)     | 0.13           |
| <b>Specific cancer sites</b>            |                         |                                                |                |                         |                |                          |                |                         |                |
| Colorectal                              | 11,063                  | 1.49<br>(0.72,3.10)                            | 0.81           | 1.49 (0.73,3.03)        | 0.80           | 1.18<br>(1.10,1.26)      | 0.47           | 1.18<br>(1.10,1.26)     | 0.42           |
| Pancreas                                | 3,351                   | 1.19<br>(0.88,1.61)                            | 0.00           | 1.19 (0.85,1.67)        | 0.06           | 1.09<br>(0.97,1.23)      | 0.00           | 1.09<br>(0.95,1.25)     | 0.09           |
| Kidney                                  | 3,398                   | 1.42<br>(1.25,1.61)                            | 0.00           | 1.41 (1.24,1.60)        | 0.00           | 1.26<br>(1.15,1.39)      | 0.35           | 1.26<br>(1.16,1.38)     | 0.21           |
| Bladder                                 | 2,787                   | 1.14<br>(0.77,1.67)                            | 0.00           | 1.14 (0.67,1.92)        | 0.00           | 1.11<br>(1.00,1.23)      | 0.00           | 1.10<br>(0.96,1.27)     | 0.00           |
| Lung                                    | 14,545                  | 0.90<br>(0.71,1.13)                            | 0.19           | 0.89 (0.70,1.12)        | 0.21           | 0.85<br>(0.64,1.13)      | 0.89           | 0.83<br>(0.66,1.05)     | 0.90           |
| Prostate                                | 48,116                  | 0.90<br>(0.63,1.28)                            | 0.69           | 0.85 (0.73,0.98)        | 0.54           | 0.96<br>(0.83,1.11)      | 0.86           | 0.95<br>(0.85,1.07)     | 0.72           |
| <b>Women</b>                            |                         |                                                |                |                         |                |                          |                |                         |                |
| †Total Cancers                          | 98,690                  | 1.08<br>(1.04,1.13)                            | 0.78           | 1.10 (1.06,1.14)        | 0.62           | 1.04<br>(1.01,1.07)      | 0.83           | 1.05<br>(1.02,1.09)     | 0.85           |
| OBR-cancers                             | 55,712                  | 1.16<br>(1.13,1.20)                            | 0.35           | 1.17 (1.14,1.20)        | 0.17           | 1.10<br>(1.07,1.13)      | 0.84           | 1.11<br>(1.08,1.14)     | 0.84           |
| NOR-cancers                             | 26,718                  | 0.90<br>(0.79,1.02)                            | 0.83           | 0.94 (0.84,1.05)        | 0.78           | 0.91<br>(0.82,1.01)      | 0.94           | 0.94<br>(0.84,1.05)     | 0.94           |
| NOR-cancers excluding lung              | 13,736                  | 1.01<br>(0.95,1.07)                            | 0.04           | 1.04 (1.00,1.08)        | 0.00           | 0.99<br>(0.90,1.10)      | 0.83           | 1.01<br>(0.91,1.12)     | 0.77           |
| <b>Specific cancer sites</b>            |                         |                                                |                |                         |                |                          |                |                         |                |
| Colorectal                              | 10,026                  | 1.14<br>(1.09,1.19)                            | 0.00           | 1.12 (1.07,1.18)        | 0.00           | 1.08<br>(1.05,1.11)      | 0.13           | 1.08<br>(1.05,1.10)     | 0.07           |
| Pancreas                                | 3,172                   | 1.04<br>(0.79,1.37)                            | 0.63           | 1.00 (0.83,1.20)        | 0.42           | 1.01<br>(0.96,1.06)      | 0.02           | 1.01<br>(0.98,1.04)     | 0.00           |
| Kidney                                  | 2,069                   | 1.33<br>(1.25,1.42)                            | 0.00           | 1.32 (1.26,1.37)        | 0.00           | 1.28<br>(1.17,1.40)      | 0.84           | 1.27<br>(1.16,1.39)     | 0.85           |
| Lung                                    | 12,894                  | 0.76<br>(0.67,0.87)                            | 0.70           | 0.81 (0.72,0.91)        | 0.50           | 0.85<br>(0.79,0.92)      | 0.79           | 0.88<br>(0.83,0.93)     | 0.69           |
| Endometrial                             | 6,138                   | 1.57<br>(1.35,1.82)                            | 0.95           | 1.58 (1.38,1.82)        | 0.92           | 1.34<br>(1.19,1.5)       | 0.95           | 1.36<br>(1.19,1.56)     | 0.96           |
| Ovarian                                 | 4,092                   | 1.01<br>(0.90,1.13)                            | 0.20           | 1.03 (0.92,1.14)        | 0.21           | 1.00<br>(0.91,1.10)      | 0.75           | 1.02<br>(0.93,1.12)     | 0.70           |
| Post-menopausal breast cancer           | 25,512                  | 1.03<br>(0.95,1.11)                            | 0.36           | 1.05 (0.96,1.15)        | 0.44           | 1.05<br>(1.01,1.1)       | 0.67           | 1.07<br>(1.02,1.12)     | 0.74           |

\*Multivariable adjusted models: baseline age, ethnicity, alcohol, smoking, HRT.  
† The sum of OBR and NOR cancer does not equal total cancers as non-melanoma skin cancers were excluded in the EPIC cohort analyses.  
**Abbreviations:** OBR, obesity-related; NOR, non-obesity-related; CI, confidence interval; HR, hazard ratio; BMI, body mass index; MV, multivariable; SD, standard deviation.

**Table S33: Comparison of the obesity degree and duration per unit standard deviation, ABACus 2 Consortium.**

| Outcomes                                                                                                                                                                                                                                                                                                                                                                                                                                                                                                                                                                                                                                                            | Number of cancer events | Degree of Obese (per SD) |                |                         |                | Duration of Obese (per SD) |                |                         |                |
|---------------------------------------------------------------------------------------------------------------------------------------------------------------------------------------------------------------------------------------------------------------------------------------------------------------------------------------------------------------------------------------------------------------------------------------------------------------------------------------------------------------------------------------------------------------------------------------------------------------------------------------------------------------------|-------------------------|--------------------------|----------------|-------------------------|----------------|----------------------------|----------------|-------------------------|----------------|
|                                                                                                                                                                                                                                                                                                                                                                                                                                                                                                                                                                                                                                                                     |                         | Age-adjusted HR (95% CI) | I <sup>2</sup> | MV-adjusted HR (95% CI) | I <sup>2</sup> | Age-adjusted HR (95% CI)   | I <sup>2</sup> | MV-adjusted HR (95% CI) | I <sup>2</sup> |
| <b>Men</b>                                                                                                                                                                                                                                                                                                                                                                                                                                                                                                                                                                                                                                                          |                         |                          |                |                         |                |                            |                |                         |                |
| †Total Cancers                                                                                                                                                                                                                                                                                                                                                                                                                                                                                                                                                                                                                                                      | 130,704                 | 1.02 (0.98,1.06)         | 0.75           | 1.02 (0.99,1.04)        | 0.58           | 1.02 (1.00,1.04)           | 0.45           | 1.02 (0.99,1.05)        | 0.53           |
| OBR-cancers                                                                                                                                                                                                                                                                                                                                                                                                                                                                                                                                                                                                                                                         | 23,060                  | 1.01 (0.98,1.04)         | 0.42           | 1.02 (0.99,1.05)        | 0.38           | 1.04 (1.01,1.07)           | 0.18           | 1.04 (1.01,1.07)        | 0.01           |
| NOR-cancers                                                                                                                                                                                                                                                                                                                                                                                                                                                                                                                                                                                                                                                         | 72,342                  | 1.00 (0.97,1.04)         | 0.62           | 1.01 (0.98,1.04)        | 0.45           | 1.01 (0.97,1.04)           | 0.59           | 1.01 (0.98,1.03)        | 0.30           |
| NOR-cancers excluding lung and prostate                                                                                                                                                                                                                                                                                                                                                                                                                                                                                                                                                                                                                             | 9,663                   | 1.01 (0.93,1.10)         | 0.71           | 1.02 (0.93,1.11)        | 0.71           | 1.01 (0.98,1.04)           | 0.00           | 1.02 (0.99,1.05)        | 0.00           |
| <b>Specific cancer sites</b>                                                                                                                                                                                                                                                                                                                                                                                                                                                                                                                                                                                                                                        |                         |                          |                |                         |                |                            |                |                         |                |
| Colorectal                                                                                                                                                                                                                                                                                                                                                                                                                                                                                                                                                                                                                                                          | 11,063                  | 1.01 (0.97,1.06)         | 0.54           | 1.02 (0.97,1.06)        | 0.51           | 1.04 (0.94,1.15)           | 0.58           | 1.03 (0.97,1.10)        | 0.56           |
| Pancreas                                                                                                                                                                                                                                                                                                                                                                                                                                                                                                                                                                                                                                                            | 3,351                   | 1.01 (0.96,1.07)         | 0.00           | 1.01 (0.96,1.07)        | 0.00           | 1.06 (0.99,1.13)           | 0.00           | 1.06 (0.99,1.13)        | 0.00           |
| Kidney                                                                                                                                                                                                                                                                                                                                                                                                                                                                                                                                                                                                                                                              | 3,398                   | 1.00 (0.94,1.06)         | 0.24           | 1.00 (0.94,1.06)        | 0.20           | 0.99 (0.89,1.11)           | 0.31           | 1.00 (0.91,1.10)        | 0.19           |
| Bladder                                                                                                                                                                                                                                                                                                                                                                                                                                                                                                                                                                                                                                                             | 2,787                   | 1.02 (0.90,1.15)         | 0.77           | 1.03 (0.91,1.17)        | 0.77           | 1.00 (0.97,1.04)           | 0.00           | 1.01 (0.98,1.06)        | 0.00           |
| Lung                                                                                                                                                                                                                                                                                                                                                                                                                                                                                                                                                                                                                                                                | 14,545                  | 1.07 (0.98,1.17)         | 0.74           | 1.09 (1.01,1.17)        | 0.62           | 1.08 (1.00,1.17)           | 0.50           | 1.10 (1.04,1.15)        | 0.19           |
| Prostate                                                                                                                                                                                                                                                                                                                                                                                                                                                                                                                                                                                                                                                            | 48,116                  | 0.99 (0.97,1.01)         | 0.00           | 0.99 (0.97,1.00)        | 0.00           | 0.98 (0.95,1.01)           | 0.24           | 0.98 (0.96,1.01)        | 0.14           |
| <b>Women</b>                                                                                                                                                                                                                                                                                                                                                                                                                                                                                                                                                                                                                                                        |                         |                          |                |                         |                |                            |                |                         |                |
| †Total Cancers                                                                                                                                                                                                                                                                                                                                                                                                                                                                                                                                                                                                                                                      | 98,690                  | 1.02 (1.00,1.04)         | 0.63           | 1.03 (1.01,1.04)        | 0.39           | 1.02 (1.00,1.05)           | 0.64           | 1.03 (1.00,1.05)        | 0.68           |
| OBR-cancers                                                                                                                                                                                                                                                                                                                                                                                                                                                                                                                                                                                                                                                         | 55,712                  | 1.02 (0.99,1.05)         | 0.81           | 1.02 (0.99,1.05)        | 0.76           | 1.03 (0.99,1.07)           | 0.79           | 1.03 (0.99,1.07)        | 0.84           |
| NOR-cancers                                                                                                                                                                                                                                                                                                                                                                                                                                                                                                                                                                                                                                                         | 26,718                  | 1.01 (0.97,1.04)         | 0.27           | 1.01 (0.99,1.04)        | 0.16           | 1.00 (0.95,1.04)           | 0.52           | 1.01 (0.97,1.05)        | 0.47           |
| NOR-cancers excluding lung                                                                                                                                                                                                                                                                                                                                                                                                                                                                                                                                                                                                                                          | 13,736                  | 1.02 (0.99,1.05)         | 0.00           | 1.02 (0.98,1.06)        | 0.10           | 1.01 (0.98,1.04)           | 0.00           | 1.02 (0.98,1.06)        | 0.19           |
| <b>Specific cancer sites</b>                                                                                                                                                                                                                                                                                                                                                                                                                                                                                                                                                                                                                                        |                         |                          |                |                         |                |                            |                |                         |                |
| Colorectal                                                                                                                                                                                                                                                                                                                                                                                                                                                                                                                                                                                                                                                          | 10,026                  | 1.02 (0.99,1.06)         | 0.18           | 1.02 (0.98,1.06)        | 0.30           | 1.03 (0.99,1.07)           | 0.05           | 1.03 (0.99,1.07)        | 0.16           |
| Pancreas                                                                                                                                                                                                                                                                                                                                                                                                                                                                                                                                                                                                                                                            | 3,172                   | 0.98 (0.88,1.10)         | 0.52           | 0.98 (0.87,1.11)        | 0.54           | 1.00 (0.91,1.10)           | 0.46           | 1.00 (0.91,1.11)        | 0.51           |
| Kidney                                                                                                                                                                                                                                                                                                                                                                                                                                                                                                                                                                                                                                                              | 2,069                   | 1.01 (0.93,1.10)         | 0.46           | 1.01 (0.94,1.10)        | 0.42           | 1.05 (0.96,1.15)           | 0.33           | 1.05 (0.96,1.14)        | 0.26           |
| Lung                                                                                                                                                                                                                                                                                                                                                                                                                                                                                                                                                                                                                                                                | 12,894                  | 0.98 (0.93,1.03)         | 0.28           | 0.99 (0.96,1.03)        | 0.00           | 0.98 (0.94,1.03)           | 0.21           | 1.00 (0.97,1.04)        | 0.00           |
| Endometrial                                                                                                                                                                                                                                                                                                                                                                                                                                                                                                                                                                                                                                                         | 6,138                   | 1.09 (1.01,1.17)         | 0.80           | 1.09 (1.02,1.17)        | 0.78           | 1.15 (1.03,1.28)           | 0.82           | 1.14 (1.02,1.28)        | 0.80           |
| Ovarian                                                                                                                                                                                                                                                                                                                                                                                                                                                                                                                                                                                                                                                             | 4,092                   | 1.05 (0.99,1.10)         | 0.00           | 1.05 (1.00,1.10)        | 0.00           | 1.08 (1.04,1.13)           | 0.00           | 1.09 (1.04,1.13)        | 0.00           |
| Post-menopausal breast cancer                                                                                                                                                                                                                                                                                                                                                                                                                                                                                                                                                                                                                                       | 25,512                  | 0.98 (0.94,1.03)         | 0.67           | 0.98 (0.94,1.03)        | 0.76           | 0.99 (0.94,1.04)           | 0.70           | 1.00 (0.95,1.05)        | 0.76           |
| <p>*Multivariable adjusted models: baseline age, ethnicity, alcohol, smoking, HRT.<br/>         † The sum of OBR and NOR cancer does not equal total cancers as non-melanoma skin cancers were excluded in the EPIC cohort analyses.<br/>         Degree of overweight is the cumulative sum of the number of BMI units <math>\geq 30</math> kg/m<sup>2</sup><br/>         Duration of overweight is the cumulative sum of the duration overweight (BMI <math>\geq 30</math>. kg/m<sup>2</sup>).<br/> <b>Abbreviations:</b> OBR, obesity-related; NOR, non-obesity-related; CI, confidence interval; HR, hazard ratio; BMI, body mass index; MV, multivariable.</p> |                         |                          |                |                         |                |                            |                |                         |                |

**Table S34: Comparison of the obesity degree and duration per 10 units and per 10 years respectively, ABACus 2 Consortium.**

| Outcomes                                                                                                                                                                                                                                                                                                                                                                                                                                                                                                                                                                                                                                   | Number of cancer events | Degree of Obese (per 10 units) |                |                         |                | Duration of Obese (per 10 years) |                |                         |                |
|--------------------------------------------------------------------------------------------------------------------------------------------------------------------------------------------------------------------------------------------------------------------------------------------------------------------------------------------------------------------------------------------------------------------------------------------------------------------------------------------------------------------------------------------------------------------------------------------------------------------------------------------|-------------------------|--------------------------------|----------------|-------------------------|----------------|----------------------------------|----------------|-------------------------|----------------|
|                                                                                                                                                                                                                                                                                                                                                                                                                                                                                                                                                                                                                                            |                         | Age-adjusted HR (95% CI)       | I <sup>2</sup> | MV-adjusted HR (95% CI) | I <sup>2</sup> | Age-adjusted HR (95% CI)         | I <sup>2</sup> | MV-adjusted HR (95% CI) | I <sup>2</sup> |
| <b>Men</b>                                                                                                                                                                                                                                                                                                                                                                                                                                                                                                                                                                                                                                 |                         |                                |                |                         |                |                                  |                |                         |                |
| †Total Cancers                                                                                                                                                                                                                                                                                                                                                                                                                                                                                                                                                                                                                             | 130,704                 | 1.01 (0.99,1.03)               | 0.90           | 1.01 (0.99,1.03)        | 0.90           | 1.03 (0.98,1.09)                 | 0.73           | 1.03 (0.99,1.08)        | 0.68           |
| OBR-cancers                                                                                                                                                                                                                                                                                                                                                                                                                                                                                                                                                                                                                                | 23,060                  | 1.02 (0.97,1.09)               | 0.95           | 1.02 (0.97,1.09)        | 0.95           | 1.12 (0.94,1.34)                 | 0.91           | 1.12 (0.95,1.32)        | 0.89           |
| NOR-cancers                                                                                                                                                                                                                                                                                                                                                                                                                                                                                                                                                                                                                                | 72,342                  | 1.00 (0.99,1.01)               | 0.00           | 1.00 (0.99,1.01)        | 0.00           | 1.01 (0.96,1.06)                 | 0.43           | 1.01 (0.93,1.08)        | 0.52           |
| NOR-cancers excluding lung and prostate                                                                                                                                                                                                                                                                                                                                                                                                                                                                                                                                                                                                    | 9,663                   | 1.01 (0.94,1.08)               | 0.86           | 1.01 (0.96,1.07)        | 0.79           | 1.04 (0.96,1.13)                 | 0.00           | 1.05 (0.99,1.11)        | 0.00           |
| <b>Specific cancer sites</b>                                                                                                                                                                                                                                                                                                                                                                                                                                                                                                                                                                                                               |                         |                                |                |                         |                |                                  |                |                         |                |
| Colorectal                                                                                                                                                                                                                                                                                                                                                                                                                                                                                                                                                                                                                                 | 11,063                  | 1.02 (0.96,1.10)               | 0.87           | 1.02 (0.96,1.1)         | 0.87           | 1.13 (0.85,1.5)                  | 0.83           | 1.12 (0.87,1.44)        | 0.78           |
| Pancreas                                                                                                                                                                                                                                                                                                                                                                                                                                                                                                                                                                                                                                   | 3,351                   | 1.01 (0.89,1.15)               | 0.80           | 1.01 (0.91,1.12)        | 0.71           | 1.10 (0.94,1.27)                 | 0.15           | 1.09 (0.94,1.27)        | 0.09           |
| Kidney                                                                                                                                                                                                                                                                                                                                                                                                                                                                                                                                                                                                                                     | 3,398                   | 1.03 (0.95,1.12)               | 0.89           | 1.03 (0.95,1.12)        | 0.89           | 1.15 (0.81,1.63)                 | 0.84           | 1.14 (0.81,1.61)        | 0.83           |
| Bladder                                                                                                                                                                                                                                                                                                                                                                                                                                                                                                                                                                                                                                    |                         | 1.01 (0.94,1.09)               | 0.83           | 1.01 (0.94,1.09)        | 0.82           | 1.02 (0.92,1.12)                 | 0.00           | 1.02 (0.93,1.12)        | 0.00           |
| Lung                                                                                                                                                                                                                                                                                                                                                                                                                                                                                                                                                                                                                                       | 14,545                  | 1.01 (1.00,1.02)               | 0.00           | 1.02 (0.99,1.04)        | 0.18           | 1.06 (0.78,1.44)                 | 0.76           | 1.07 (0.76,1.52)        | 0.85           |
| Prostate                                                                                                                                                                                                                                                                                                                                                                                                                                                                                                                                                                                                                                   | 48,116                  | 1.00 (0.99,1.01)               | 0.04           | 1.00 (0.99,1.01)        | 0.04           | 0.99 (0.96,1.02)                 | 0.00           | 0.98 (0.96,1.00)        | 0.00           |
| <b>Women</b>                                                                                                                                                                                                                                                                                                                                                                                                                                                                                                                                                                                                                               |                         |                                |                |                         |                |                                  |                |                         |                |
| †Total Cancers                                                                                                                                                                                                                                                                                                                                                                                                                                                                                                                                                                                                                             | 98,690                  | 1.00 (1.00,1.01)               | 0.88           | 1.00 (1.00,1.01)        | 0.88           | 1.03 (0.99,1.06)                 | 0.74           | 1.03 (0.99,1.07)        | 0.76           |
| OBR-cancers                                                                                                                                                                                                                                                                                                                                                                                                                                                                                                                                                                                                                                | 55,712                  | 1.01 (0.99,1.02)               | 0.92           | 1.01 (0.99,1.02)        | 0.92           | 1.05 (0.99,1.11)                 | 0.82           | 1.05 (0.98,1.12)        | 0.86           |
| NOR-cancers                                                                                                                                                                                                                                                                                                                                                                                                                                                                                                                                                                                                                                | 26,718                  | 1.00 (0.99,1.02)               | 0.61           | 1.00 (0.98,1.02)        | 0.62           | 1.00 (0.92,1.08)                 | 0.55           | 1.01 (0.94,1.09)        | 0.48           |
| NOR-cancers excluding lung                                                                                                                                                                                                                                                                                                                                                                                                                                                                                                                                                                                                                 | 13,736                  | 1.00 (1.00,1.00)               | 0.00           | 1.00 (0.98,1.02)        | 0.52           | 1.02 (0.98,1.06)                 | 0.00           | 1.03 (0.99,1.07)        | 0.00           |
| <b>Specific cancer sites</b>                                                                                                                                                                                                                                                                                                                                                                                                                                                                                                                                                                                                               |                         |                                |                |                         |                |                                  |                |                         |                |
| Colorectal                                                                                                                                                                                                                                                                                                                                                                                                                                                                                                                                                                                                                                 | 10,026                  | 1.00 (0.99,1.02)               | 0.47           | 1.00 (0.99,1.02)        | 0.46           | 1.03 (0.96,1.11)                 | 0.48           | 1.03 (0.95,1.12)        | 0.52           |
| Pancreas                                                                                                                                                                                                                                                                                                                                                                                                                                                                                                                                                                                                                                   | 3,172                   | 1.00 (0.96,1.04)               | 0.63           | 1.00 (0.96,1.04)        | 0.63           | 1.01 (0.85,1.21)                 | 0.56           | 1.03 (0.84,1.26)        | 0.61           |
| Kidney                                                                                                                                                                                                                                                                                                                                                                                                                                                                                                                                                                                                                                     | 2,069                   | 1.01 (0.99,1.04)               | 0.59           | 1.00 (0.99,1.02)        | 0.17           | 1.08 (0.92,1.27)                 | 0.63           | 1.07 (0.92,1.25)        | 0.53           |
| Lung                                                                                                                                                                                                                                                                                                                                                                                                                                                                                                                                                                                                                                       | 12,894                  | 0.99 (0.98,1.01)               | 0.10           | 1.00 (1.00,1.00)        | 0.00           | 0.99 (0.92,1.06)                 | 0.41           | 1.00 (0.95,1.05)        | 0.00           |
| Endometrial                                                                                                                                                                                                                                                                                                                                                                                                                                                                                                                                                                                                                                | 6,138                   | 1.03 (0.99,1.06)               | 0.92           | 1.02 (0.99,1.06)        | 0.93           | 1.22 (0.93,1.59)                 | 0.95           | 1.21 (0.93,1.58)        | 0.94           |
| Ovarian                                                                                                                                                                                                                                                                                                                                                                                                                                                                                                                                                                                                                                    | 4,092                   | 1.01 (1.00,1.02)               | 0.00           | 1.01 (1.00,1.02)        | 0.00           | 1.10 (0.98,1.23)                 | 0.37           | 1.10 (0.97,1.24)        | 0.42           |
| Post-menopausal breast cancer                                                                                                                                                                                                                                                                                                                                                                                                                                                                                                                                                                                                              | 25,512                  | 1.00 (0.98,1.02)               | 0.77           | 1.00 (0.98,1.02)        | 0.78           | 1.01 (0.93,1.08)                 | 0.68           | 1.02 (0.94,1.11)        | 0.77           |
| <p>*Multivariable adjusted models: baseline age, ethnicity, alcohol, smoking, HRT.<br/> † The sum of OBR and NOR cancer does not equal total cancers as non-melanoma skin cancers were excluded in the EPIC cohort analyses.<br/> Degree of overweight is the cumulative sum of the number of BMI units <math>\geq 30</math> kg/m<sup>2</sup><br/> Duration of overweight is the cumulative sum of the duration overweight (BMI <math>\geq 30</math> kg/m<sup>2</sup>).<br/> <b>Abbreviations:</b> OBR, obesity-related; NOR, non-obesity-related; CI, confidence interval; HR, hazard ratio; BMI, body mass index; MV, multivariable.</p> |                         |                                |                |                         |                |                                  |                |                         |                |

**Table S35: Comparison of Harrell's C-statistic of metrics, ABACus 2 Consortium.**

| Harrell's C-statistic(95% CI)           |                         |                         |                                                                |                               |                                                                                            |                                                                         |                         |                      |                                                                  |
|-----------------------------------------|-------------------------|-------------------------|----------------------------------------------------------------|-------------------------------|--------------------------------------------------------------------------------------------|-------------------------------------------------------------------------|-------------------------|----------------------|------------------------------------------------------------------|
| Characteristic                          | Obese-years             | Baseline BMI            | Difference in c-statistic between baseline BMI and obese-years | Obese-years with baseline BMI | Difference in c-statistic between obese-years with BMI combined compared with obese-years. | Difference in c-statistic between obese-years with BMI combined and BMI | Degree of obesity       | Duration of obesity  | Difference in c-statistic between duration and degree of obesity |
| <b>Men</b>                              |                         |                         |                                                                |                               |                                                                                            |                                                                         |                         |                      |                                                                  |
| Total Cancers                           | 0.599<br>(0.553, 0.643) | 0.601<br>(0.549, 0.651) | -0.001<br>(-0.004, 0.002)                                      | 0.600<br>(0.536, 0.661)       | 0.000<br>(-0.002, 0.003)                                                                   | 0.002<br>(-0.001, 0.005)                                                | 0.600<br>(0.548, 0.649) | 0.602 (0.551, 0.650) | -0.000<br>(-0.004, 0.004)                                        |
| OR-cancers                              | 0.607<br>(0.572, 0.641) | 0.609<br>(0.573, 0.644) | 0.003<br>(-0.001, 0.007)                                       | 0.607<br>(0.563, 0.649)       | 0.003<br>(-0.000, 0.006)                                                                   | 0.000<br>(-0.001, 0.001)                                                | 0.607<br>(0.572, 0.641) | 0.610 (0.578, 0.642) | 0.002<br>(0.000, 0.004)                                          |
| NOR-cancers                             | 0.606<br>(0.547, 0.663) | 0.610<br>(0.554, 0.663) | 0.000<br>(-0.003, 0.004)                                       | 0.611<br>(0.549, 0.669)       | 0.001<br>(-0.001, 0.003)                                                                   | 0.000<br>(-0.003, 0.004)                                                | 0.607<br>(0.546, 0.664) | 0.641 (0.549, 0.723) | 0.001<br>(-0.003, 0.004)                                         |
| NOR-cancers excluding lung and prostate | 0.621<br>(0.546, 0.691) | 0.621<br>(0.545, 0.692) | 0.000<br>(-0.002, 0.002)                                       | 0.625<br>(0.538, 0.704)       | -0.000<br>(-0.001, 0.001)                                                                  | -0.000<br>(-0.001, 0.001)                                               | 0.621<br>(0.545, 0.691) | 0.621 (0.545, 0.691) | 0.000<br>(-0.001, 0.001)                                         |
| <b>Specific cancer sites</b>            |                         |                         |                                                                |                               |                                                                                            |                                                                         |                         |                      |                                                                  |
| Colorectal                              | 0.626<br>(0.578, 0.671) | 0.626<br>(0.586, 0.665) | 0.002<br>(-0.002, 0.006)                                       | 0.627<br>(0.581, 0.670)       | 0.002<br>(-0.000, 0.005)                                                                   | 0.000<br>(-0.002, 0.002)                                                | 0.628<br>(0.582, 0.672) | 0.629 (0.580, 0.676) | 0.000<br>(-0.002, 0.002)                                         |
| Pancreas                                | 0.607<br>(0.492, 0.712) | 0.609<br>(0.487, 0.718) | 0.000<br>(-0.001, 0.002)                                       | 0.617<br>(0.530, 0.697)       | 0.001<br>(-0.002, 0.005)                                                                   | 0.008<br>(-0.009, 0.025)                                                | 0.607<br>(0.490, 0.713) | 0.606 (0.477, 0.721) | -0.000<br>(-0.005, 0.004)                                        |
| Kidney                                  | 0.588<br>(0.553, 0.621) | 0.592<br>(0.566, 0.617) | 0.014<br>(0.001, 0.027)                                        | 0.596<br>(0.568, 0.624)       | 0.018<br>(0.010, 0.027)                                                                    | 0.000<br>(-0.002, 0.002)                                                | 0.575<br>(0.544, 0.606) | 0.578 (0.549, 0.606) | 0.002<br>(-0.005, 0.009)                                         |
| Bladder                                 | 0.709<br>(0.603, 0.796) | 0.709<br>(0.600, 0.797) | 0.000<br>(-0.003, 0.003)                                       | 0.708<br>(0.613, 0.788)       | -0.000<br>(-0.003, 0.002)                                                                  | 0.000<br>(-0.003, 0.003)                                                | 0.709<br>(0.602, 0.796) | 0.709 (0.606, 0.794) | 0.000<br>(-0.002, 0.003)                                         |
| Lung                                    | 0.720<br>(0.694, 0.744) | 0.725<br>(0.695, 0.754) | 0.005<br>(0.000, 0.009)                                        | 0.723<br>(0.671, 0.770)       | 0.006<br>(0.002, 0.011)                                                                    | 0.001<br>(-0.001, 0.003)                                                | 0.720<br>(0.693, 0.746) | 0.720 (0.693, 0.746) | -0.000<br>(-0.001, 0.001)                                        |
| Prostate                                | 0.616<br>(0.563, 0.666) | 0.616<br>(0.559, 0.670) | -0.001<br>(-0.006, 0.005)                                      | 0.604<br>(0.544, 0.661)       | -0.001<br>(-0.005, 0.004)                                                                  | -0.000<br>(-0.004, 0.003)                                               | 0.615<br>(0.561, 0.667) | 0.611 (0.556, 0.664) | -0.001<br>(-0.006, 0.004)                                        |
| <b>Women</b>                            |                         |                         |                                                                |                               |                                                                                            |                                                                         |                         |                      |                                                                  |
| Total Cancers                           | 0.574<br>(0.551, 0.596) | 0.581<br>(0.560, 0.601) | 0.000<br>(-0.000, 0.001)                                       | 0.568<br>(0.530, 0.606)       | 0.000<br>(-0.001, 0.002)                                                                   | -0.000<br>(-0.000, 0.000)                                               | 0.577<br>(0.557, 0.598) | 0.579 (0.556, 0.600) | 0.000<br>(-0.000, 0.001)                                         |
| OR-cancers                              | 0.564<br>(0.534, 0.593) | 0.569<br>(0.541, 0.596) | 0.003<br>(0.001, 0.005)                                        | 0.574<br>(0.549, 0.599)       | 0.003<br>(0.001, 0.005)                                                                    | 0.000<br>(-0.004, 0.005)                                                | 0.560<br>(0.529, 0.591) | 0.565 (0.537, 0.593) | 0.001<br>(0.000, 0.002)                                          |
| NOR-cancers                             | 0.644<br>(0.590, 0.694) | 0.645<br>(0.589, 0.697) | 0.003<br>(-0.000, 0.006)                                       | 0.639<br>(0.581, 0.693)       | 0.002<br>(-0.002, 0.006)                                                                   | 0.001<br>(-0.000, 0.002)                                                | 0.643<br>(0.590, 0.693) | 0.643 (0.591, 0.693) | 0.000<br>(-0.000, 0.001)                                         |
| NOR-cancers excluding lung              | 0.596<br>(0.546, 0.643) | 0.597<br>(0.547, 0.645) | 0.001<br>(-0.002, 0.004)                                       | 0.600<br>(0.553, 0.646)       | 0.001<br>(-0.002, 0.003)                                                                   | 0.000<br>(-0.000, 0.001)                                                | 0.596<br>(0.547, 0.643) | 0.596 (0.547, 0.643) | -0.001<br>(-0.002, 0.001)                                        |
| <b>Specific cancer sites</b>            |                         |                         |                                                                |                               |                                                                                            |                                                                         |                         |                      |                                                                  |
| Colorectal                              | 0.621<br>(0.555, 0.684) | 0.626<br>(0.570, 0.679) | -0.000<br>(-0.002, 0.001)                                      | 0.623<br>(0.564, 0.679)       | -0.000<br>(-0.000, 0.000)                                                                  | 0.000<br>(-0.001, 0.001)                                                | 0.621<br>(0.555, 0.683) | 0.622 (0.555, 0.684) | 0.001<br>(-0.001, 0.002)                                         |
| Pancreas                                | 0.636<br>(0.588, 0.681) | 0.636<br>(0.589, 0.681) | 0.001<br>(-0.001, 0.002)                                       | 0.637<br>(0.590, 0.682)       | 0.001<br>(-0.000, 0.001)                                                                   | -0.000<br>(-0.001, 0.000)                                               | 0.637<br>(0.590, 0.681) | 0.637 (0.589, 0.682) | 0.000<br>(-0.001, 0.001)                                         |
| Kidney                                  | 0.586<br>(0.555, 0.617) | 0.612<br>(0.588, 0.635) | 0.015<br>(0.003, 0.027)                                        | 0.615<br>(0.594, 0.635)       | 0.013<br>(0.002, 0.023)                                                                    | -0.000<br>(-0.004, 0.003)                                               | 0.588<br>(0.559, 0.616) | 0.590 (0.569, 0.612) | 0.010<br>(0.001, 0.020)                                          |
| Lung                                    | 0.743<br>(0.715, 0.769) | 0.745<br>(0.717, 0.772) | 0.003<br>(-0.001, 0.007)                                       | 0.739<br>(0.713, 0.763)       | 0.003<br>(-0.002, 0.007)                                                                   | 0.001<br>(-0.001, 0.002)                                                | 0.743<br>(0.716, 0.767) | 0.744 (0.716, 0.770) | 0.001<br>(-0.000, 0.002)                                         |
| Endometrial                             | 0.605<br>(0.572, 0.638) | 0.625<br>(0.583, 0.665) | 0.013<br>(0.000, 0.026)                                        | 0.623<br>(0.584, 0.660)       | 0.016<br>(0.004, 0.027)                                                                    | 0.000<br>(-0.000, 0.000)                                                | 0.602<br>(0.564, 0.639) | 0.612 (0.578, 0.645) | -0.002<br>(-0.014, 0.010)                                        |
| Ovarian                                 | 0.577<br>(0.531, 0.622) | 0.575<br>(0.528, 0.621) | 0.000<br>(-0.003, 0.004)                                       | 0.580<br>(0.532, 0.627)       | 0.000<br>(-0.003, 0.003)                                                                   | 0.001<br>(0.000, 0.001)                                                 | 0.575<br>(0.526, 0.623) | 0.576 (0.527, 0.624) | 0.002<br>(-0.001, 0.005)                                         |
| Post-menopausal breast cancer           | 0.585<br>(0.513, 0.654) | 0.589<br>(0.520, 0.654) | 0.004<br>(0.001, 0.006)                                        | 0.589<br>(0.519, 0.657)       | 0.003<br>(0.001, 0.006)                                                                    | -0.000<br>(-0.000, 0.000)                                               | 0.586<br>(0.513, 0.655) | 0.586 (0.515, 0.653) | 0.000<br>(-0.001, 0.001)                                         |

\*All models were multivariable adjusted, including baseline age, ethnicity, alcohol, smoking, HRT.  
Key: Green – significant difference in C-statistic.  
**Abbreviations:** SE, standard error; OR, obesity-related; NOR, non-obesity-related; BMI, body mass index.
